# Supplementary material for: Unveiling the Molecular Landscape of FOXA1 Mutant Prostate Cancer: Insights and Prospects for Targeted Therapeutic Strategies
Source: MDPI journal article supplement (doi:10.3390/ijms242115823), 2023-10-31
Supplement: s1 [file s1]

# Unveiling the Molecular Landscape of *FOXA1* Mutant Prostate Cancer: Insights and Prospects for Targeted Therapeutic Strategies

## Supplementary Data

**Supplementary Figure S1.** (A) Kaplan-Meier analysis plots comparing Overall Survival and Disease Free Months between *FOXA1* mutant and control groups. (B) A lollipop plot presenting the location of mutations and mutation types of *FOXA1* in *FOXA1* mutant prostate cancer. The plot was obtained from cBioportal.

**A)**

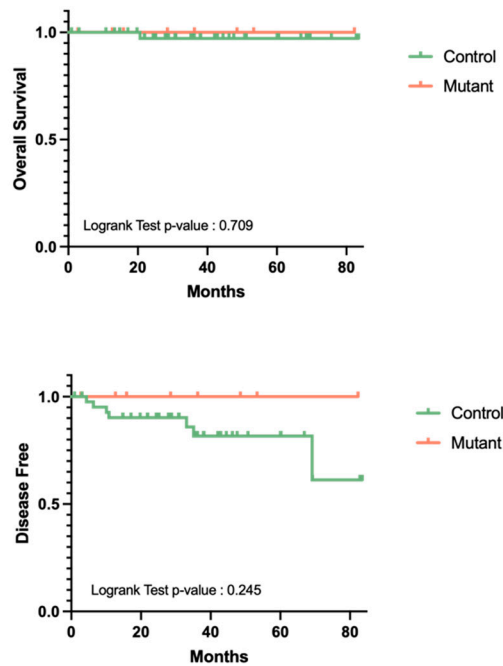

**B)**

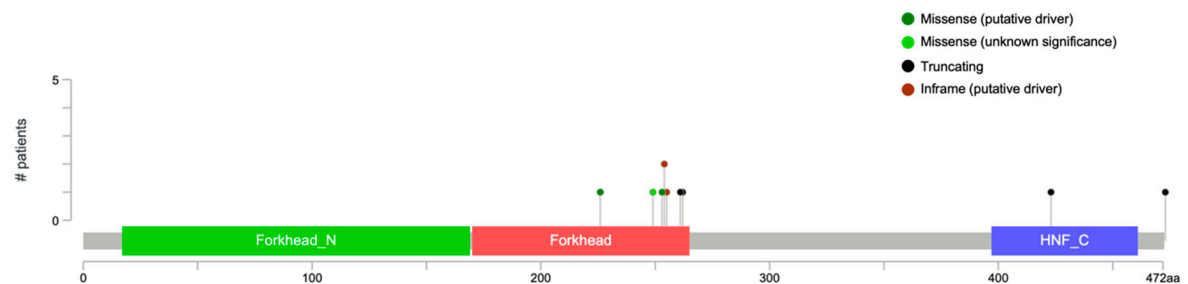

**Supplementary Table S1.** Detailed information of *FOXA1* mutations

| Sample ID       | Protein Change   | Mutation Type         | Variant Type                   |
|-----------------|------------------|-----------------------|--------------------------------|
| TCGA-YL-A9WI-01 | D226N            | Missense_Mutation     | Single Nucleotide Polymorphism |
| TCGA-KK-A8IB-01 | M253K            | Missense_Mutation     | Single Nucleotide Polymorphism |
| TCGA-CH-5737-01 | E255_N256del     | In_Frame_Deletion     | Deletion                       |
| TCGA-HC-7210-01 | F254_G257delinsC | In_Frame_Deletion     | Deletion                       |
| TCGA-KK-A8IG-01 | Q263Afs*60       | Frame_Shift_Insertion | Insertion                      |
| TCGA-EJ-5494-01 | *473Eext*34      | Nonstop_Mutation      | Single Nucleotide Polymorphism |
| TCGA-EJ-5494-01 | A423Dfs*17       | Frame_Shift_Deletion  | Deletion                       |

|                 |            |                      |                                |
|-----------------|------------|----------------------|--------------------------------|
| TCGA-J9-A8CP-01 | R262Sfs*57 | Frame_Shift_Deletion | Deletion                       |
| TCGA-HC-8265-01 | D249V      | Missense_Mutation    | Single Nucleotide Polymorphism |
| TCGA-EJ-7789-01 | F254V      | Missense_Mutation    | Single Nucleotide Polymorphism |

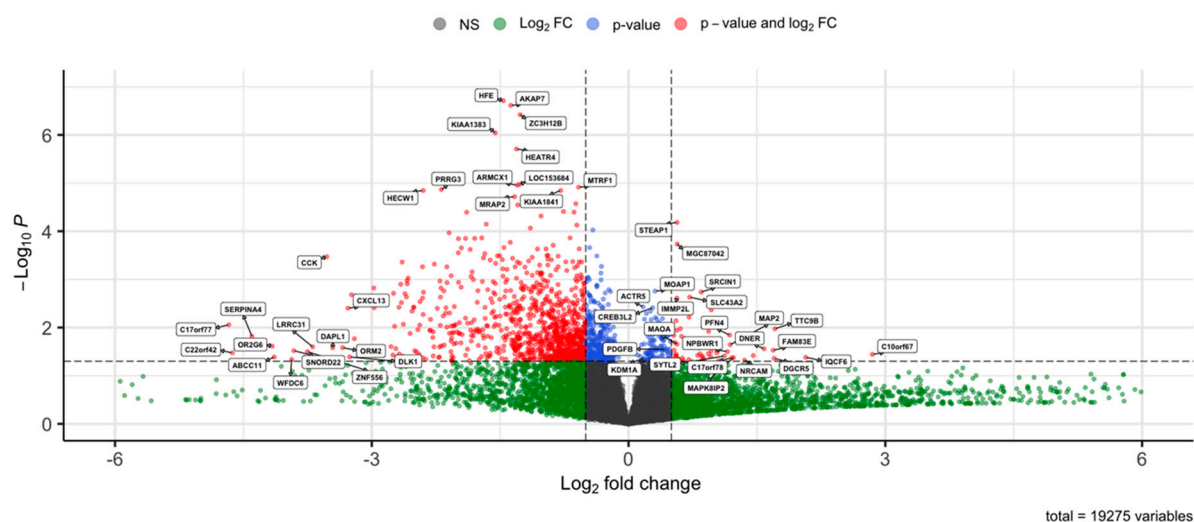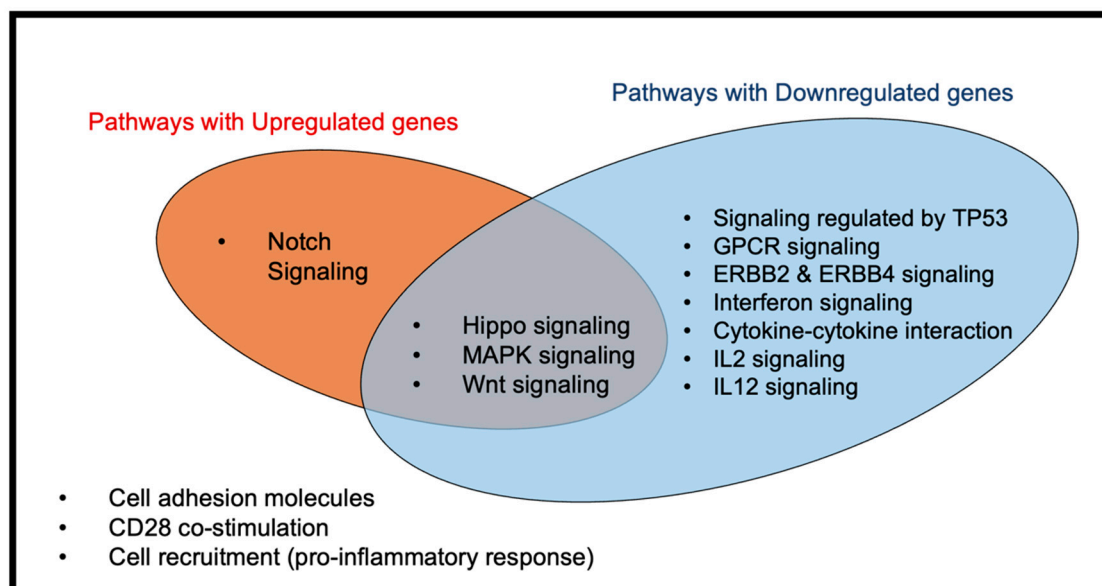

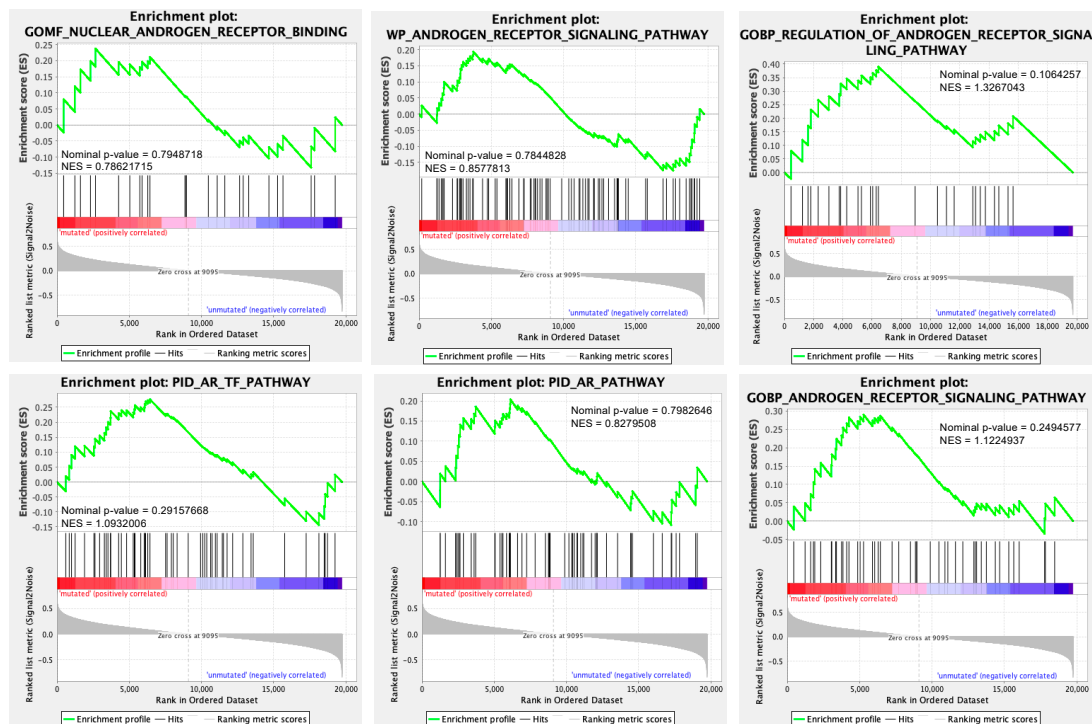

**Supplementary Figure S3.** GSEA analysis for AR signaling. GSEA analysis shows no significant difference in AR signaling in *FOXA1* mutant and control group.

\*NES=Normalized Enrichment Score.

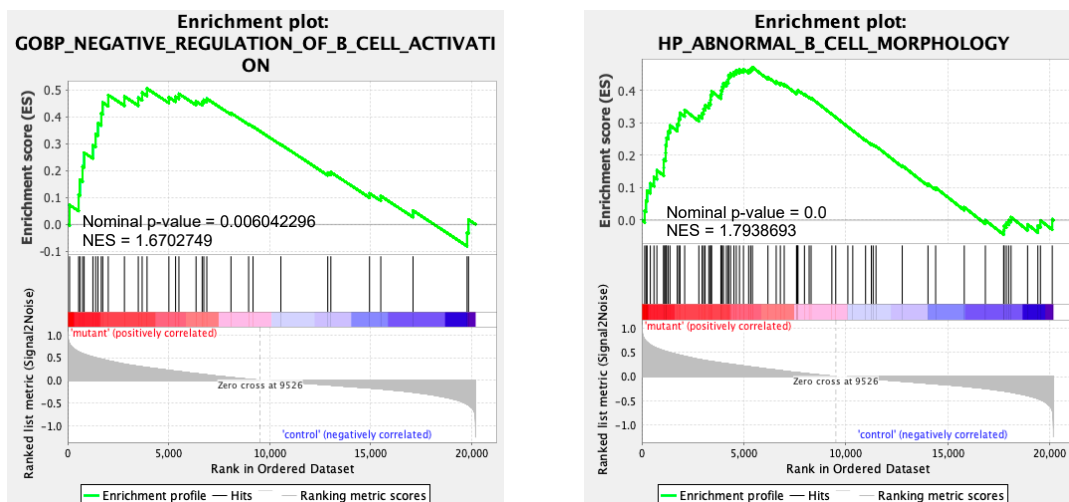

**Supplementary Figure S4.** GSEA analysis related to B cell. Negative regulation of B cell activation and abnormal B cell morphology were upregulated in *FOXA1* mutant group.

\*NES=Normalized Enrichment Score.

**Supplementary Table S2.** *FOXA1* mutation-associated signaling pathways in TCGA and GEO datasets.

| Pathways                    | <i>p</i> -value |             |
|-----------------------------|-----------------|-------------|
|                             | TCGA            | GSE123619   |
| Hippo signaling pathway     | 0.007           | 0.018835332 |
| ERBB signaling pathway      | 0.00229186      | 4.62334E-05 |
| Interferon signaling        | 0.014055387     | 0.028836313 |
| Notch signaling             | 0.01188312      | 0.046089423 |
| Cell adhesion               | 0.04769012      | 0.000230778 |
| Wnt signaling               | 0.00767968      | 0.045312137 |
| Signaling regulated by TP53 | 0.00113         | 2.89E-07    |
| MAPK signaling              | 0.03439121      | 7.65E-05    |
| IL2 signaling               | 0.012385331     | 0.000129847 |

**Supplementary Table S3.** Monoamine neurotransmitter related pathways.

| Pathways                               | <i>p</i> -value |             |
|----------------------------------------|-----------------|-------------|
|                                        | TCGA            | GSE123619   |
| Dopamine beta-hydroxylase deficiency   | 0.000605401     | 0.038811814 |
| Monoamine oxidase-a deficiency (MAO-A) | 0.000605401     | 0.038811814 |
| Serotonin                              | 0.019527612     | 0.048104587 |

PPI enrichment p-value = 0.000271  
 Number of nodes : 183  
 Average node degree : 1.96  
 Average local clustering coefficient : 0.385

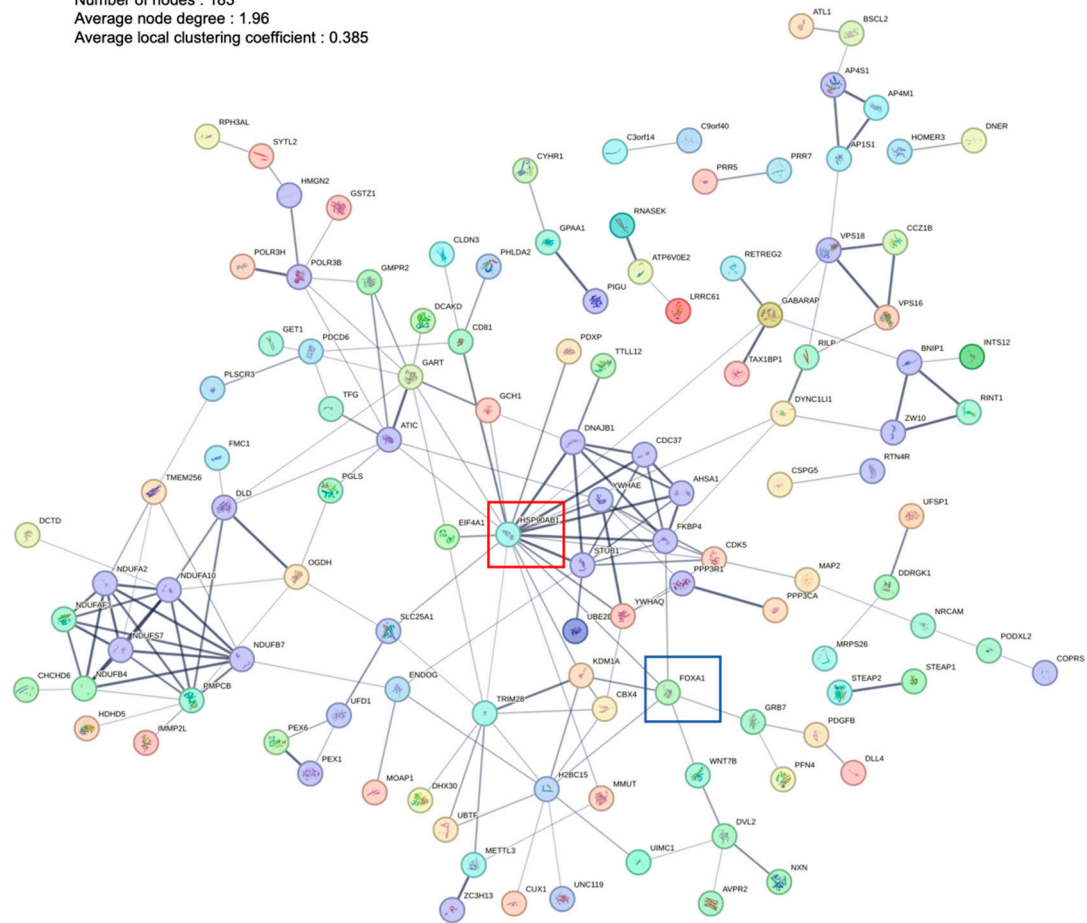

**Supplementary Figure S5.** Protein-protein interaction presented by STRING. The results displayed connected nodes representing proteins encoded by the 168 upregulated genes and other proteins mediating their interactions. The lines connecting proteins indicate both functional and physical protein associations, and the line thickness indicates the strength of data support. HSP90AB1 protein was marked by the red box and FOXA1 protein was marked by the blue box.
