# Supplementary material for: Unveiling the Molecular Landscape of FOXA1 Mutant Prostate Cancer: Insights and Prospects for Targeted Therapeutic Strategies
Source: Int J Mol Sci. 2023 Oct 31;24(21):15823. doi: 10.3390/ijms242115823 (PMC10650174; doi:10.3390/ijms242115823)
Supplement: Supplementary file 1 [file ijms-24-15823-s001.zip › Supplementary table 4-6.xlsx]

## Sheet: Table S4
#TCGA dataset_Pathway analysis genes			mutant	mutant	mutant	mutant	mutant	mutant	mutant	mutant	mutant	control	control	control	control	control	control	control	control	control	control	control	control	control	control	control	control	control	control	control	control	control	control	control	control	control	control	control	control	control	control	control	control	control	control	control	control	control	control
pathway	gene	pval	TCGA.J9.A8CP.01	TCGA.YL.A9WI.01	TCGA.KK.A8IG.01	TCGA.EJ.5494.01	TCGA.HC.8265.01	TCGA.EJ.7789.01	TCGA.CH.5737.01	TCGA.HC.7210.01	TCGA.KK.A8IB.01	TCGA.EJ.A46G.01	TCGA.YL.A8S9.01	TCGA.KK.A8ID.01	TCGA.FC.A4JI.01	TCGA.HC.7075.01	TCGA.EJ.A65J.01	TCGA.EJ.7781.01	TCGA.WW.A8ZI.01	TCGA.G9.6499.01	TCGA.CH.5761.01	TCGA.EJ.5514.01	TCGA.HC.7736.01	TCGA.EJ.5532.01	TCGA.EJ.8470.01	TCGA.KK.A8IJ.01	TCGA.YL.A8SQ.01	TCGA.VN.A88N.01	TCGA.XJ.A83H.01	TCGA.EJ.7786.01	TCGA.G9.6378.01	TCGA.J9.A8CL.01	TCGA.KK.A8IL.01	TCGA.EJ.7218.01	TCGA.EJ.A65G.01	TCGA.G9.7519.01	TCGA.EJ.5515.01	TCGA.EJ.7331.01	TCGA.HC.8256.01	TCGA.V1.A8MG.01	TCGA.HC.7742.01	TCGA.G9.7521.01	TCGA.KC.A7F3.01	TCGA.V1.A8MF.01	TCGA.HC.7750.01	TCGA.EJ.A8FN.01	TCGA.EJ.7794.01	TCGA.EJ.5518.01	TCGA.CH.5792.01
Signaling pathways regulated by TP53	ATM	0.0419302	702.269	1068.37	734.975	1154.45	644.809	886.338	836.588	768.018	494.987	478.804	1160.13	876.046	132.289	1060.12	624.832	1925.79	1984.48	525.917	810.694	2016.94	1326.41	1183.72	1818.96	1004.14	827.472	932.591	1016.35	1092.49	893.302	680.493	973.979	729.321	756.225	506	1133.5	1608.07	1133.18	1102.14	927.205	571.35	886.942	906.149	698.98	871.4	1302.24	910.443	761.421
Signaling pathways regulated by TP53	BCL2L14	0.00100497	24.6655	58.0423	74.3842	8.7912	41.232	28.8654	52.212	26.8064	36.9393	159.239	26.8212	60.5819	11.7918	38.4035	18.4226	56.5544	30.4038	108.362	55.6525	44.2842	89.9527	64.77	117.945	64.2354	14.8352	26.7112	142.138	36.6418	157.084	39.7982	238.672	84.9694	52.1135	129.839	58.7643	59.4441	48.7177	58.745	33.7711	24.9247	86.0189	229.126	69.9573	80.9335	154.157	9.0121	15.4499
Signaling pathways regulated by TP53	PPP1R13B	0.013145	1002.91	1148.06	1321.67	1795.4	1529.56	1417.8	1288.16	1355.17	1156.73	1135.87	1468.35	1464.73	1881.9	1816.73	1053.92	1638.77	2887.09	976.702	1610.53	1052.42	2260.39	1508.47	1723.21	1675.09	1952.2	1755.57	1964.15	1774.81	1436.87	2228.14	1388.07	1566.78	1707.59	2012.13	1786	1629.01	1526.09	1879.17	1249.53	1314.43	1346.26	1883.5	1287.1	1501.49	1755.32	1789.34	1684.55
Signaling pathways regulated by TP53	TP53AIP1	0.0179196	5.5846	9.3458	6.8966	2.3976	7.4516	8.4898	5.5799	2.2608	16.8865	4.8913	10.4557	7.5727	1.8425	3.4068	2.3028	3.9229	15.2019	5.7793	6.4475	8.3872	11.0468	7.8692	14.9017	7.0452	13.1868	17.5005	25.7862	4.6247	21.9324	7.287	22.8802	10.6212	5.7904	4.4516	13.0587	5.236	11.0902	20.0267	3.7523	3.0129	37.0416	18.123	29.6429	5.9583	18.1361	3.3795	5.15
Signaling pathways regulated by TP53	TP53BP2	0.0302573	813.031	798.819	816.256	1005	848.485	866.812	810.682	678.879	921.9	1032.61	984.657	1108.41	1717.92	1343.5	842.065	923.504	1009.03	863.283	1080.81	779.669	800.631	918.583	1248.26	1164.94	816.484	865.352	1002.52	1057.63	941.909	933.296	897.712	887.673	813.549	688.146	719.536	1146.69	1164.47	584.112	792.12	1111.48	941.269	675.728	783.759	1020.85	1020.16	556.044	1017.12
Signaling pathways regulated by TP53	TP63	0.00362197	74.9273	26.5617	132.512	281.718	643.318	2.9714	58.9876	257.729	248.021	43.4783	2.7276	32.6823	0.3685	21.6794	9.5951	462.243	152.652	501.354	86.1935	369.706	593.635	292.675	1238.74	213.013	110.989	280.468	1006.92	413.732	662.715	72.3094	819.201	120.373	89.172	26.7097	1154.39	526.064	380.236	923.899	268.668	41.9063	648.64	449.191	826.445	138.034	1100.47	105.441	933.429
Signaling pathways regulated by TP53	TP73	0.00982555	30.7155	87.0635	22.6601	22.7772	73.0253	43.7226	11.1598	26.8064	38.5224	335.326	20.9115	132.324	56.748	9.9106	42.6022	57.2082	22.8029	37.2043	99.7673	60.3875	82.3251	25.1211	125.555	48.4874	56.5934	68.6203	83.0189	43.0452	57.4985	71.1883	65.9489	32.5072	22.0035	7.4194	72.2583	50.2041	139.816	74.7664	27.7674	16.7078	76.5527	17.4757	97.8217	27.3088	138.612	48.6651	181.793
Hippo signaling pathway	ACTG2	0.025273	11729.6	2106.74	21598.5	5604	13013.4	1067.6	3064.57	16025.7	17367.3	5838.59	354.586	2257.07	114.233	4416.71	2387.64	15156.9	3464.13	24726	3401.59	2595.32	11942.9	12435.2	2497.15	11924.6	6497.8	5455.54	10494.3	14954.8	46045.6	7818.95	10541	8665.27	11632.3	64821.1	48507.5	18133.2	6654.92	15833.1	54916.3	9063.82	16632.9	6931.39	77590.4	13443.4	18279.6	11744.3	35915.8
Hippo signaling pathway	AMOT	0.0297841	321.117	446.631	354.187	519.081	218.579	629.945	360.303	769.633	372.032	250	79.5545	111.997	31.6905	529.906	137.018	728.016	691.053	740.473	261.974	1306.05	608.364	347.458	1114.77	455.45	346.154	256.06	687.421	651.014	458.21	844.731	498.43	323.463	350.897	574.63	1224.47	681.605	650.758	500.668	763.977	1213.09	889.411	190.939	740.481	627.607	5066.78	401.712	2560.04
Hippo signaling pathway	BMP8B	0.0201776	41.4194	22.1348	89.1626	75.9241	59.6125	92.1146	43.4436	29.0671	22.6913	21.7391	90.9194	101.634	107.6	23.2279	41.067	168.683	67.7751	22.3948	299.302	141.575	100.473	253.329	52.6316	20.3067	53.2967	76.91	68.5535	132.337	88.3699	165.359	74.4729	49.2436	48.0602	47.4839	74.87	60.9841	34.0628	128.171	108.067	193.372	48.9773	69.9029	31.4215	50.149	93.5954	94.4013	77.5068
Hippo signaling pathway	BMPR1A	0.00611963	896.335	591.736	765.517	700.1	587.183	675.366	597.449	917.876	471.24	891.848	1383.79	836.987	1111.75	799.66	489.733	1062.44	521.298	934.441	3133.85	1280.55	1368.49	918.886	780.913	1116.04	1006.04	1043.58	691.824	1024.9	664.493	1058.86	493.495	926.295	970.469	709.291	1759.88	1200.59	748.589	697.597	755.722	930.43	612.833	475.081	787.316	606.753	1005.58	983.44	676.189
Hippo signaling pathway	DCHS1	0.00332262	542.641	153.96	565.517	577.822	592.151	217.34	302.909	1050.29	356.728	611.413	222.298	226.385	91.3865	1907.79	278.257	2218.7	263.5	393.715	613.196	614.61	907.417	829.601	735.891	498.135	621.978	246.388	922.641	805.407	3317.13	620.516	813.818	431.606	471.338	1645.24	766.982	1069.07	305.773	603.471	1112.57	368.118	434.21	546.926	1246.19	551.639	1307.1	968.345	1250.41
Hippo signaling pathway	DVL2	0.00685845	1158.35	1108.71	984.236	860.34	742.673	989.49	952.172	1147.18	948.285	921.196	1063.76	720.606	854.906	840.851	653.234	558.025	578.306	744.447	220.574	557.242	901.105	793.583	887.128	904.683	822.528	1090.56	1026.42	827.463	1001.19	822.87	809.78	1051.5	767.226	857.307	781.782	759.529	751.361	1037.38	633.771	655.985	788.987	551.456	860.831	894.24	933.687	1048.78	1024.58
Hippo signaling pathway	FAT4	0.00829331	169.401	100.836	261.576	250.949	150.025	139.658	100.837	354.619	89.1821	226.63	33.1856	56.1977	10.3178	145.562	110.152	540.046	139.984	94.6361	151.687	694.121	381.115	565.981	167.406	140.489	268.681	55.2646	79.8742	562.789	483.106	235.426	119.336	217.895	165.605	203.291	408.303	786.017	140.212	217.624	238.274	239.934	129.646	208.414	457.687	272.592	647.071	391.348	374.659
Hippo signaling pathway	FRMD6	0.00864556	411.867	181.505	779.803	500.699	488.326	139.233	198.486	710.53	620.053	336.413	73.1901	124.751	12.5288	293.601	210.708	1023.21	473.793	545.422	341.381	794.431	683.588	960.654	568.485	358.475	584.615	252.836	564.151	930.63	1585.06	363.229	1076.27	296.427	610.307	529.371	1744.65	1200.59	501.04	901.202	865.291	337.99	690.621	425.89	1516.53	699.106	1472.91	463.896	872.402
Hippo signaling pathway	FZD7	0.0307248	551.018	264.634	891.133	497.502	513.661	265.307	310.482	870.399	481.794	634.239	130.015	170.187	40.9028	345.322	606.026	637.136	285.669	666.065	390.586	872.599	1133.09	646.792	433.735	523	690.11	373.036	440.88	748.488	1453.47	593.049	406.909	368.844	553.561	816.13	1126.97	941.249	288.345	917.89	1269.42	436.867	558.917	553.398	1212.4	606.256	1030.84	806.128	927.249
Hippo signaling pathway	FZD8	0.0224834	78.185	125.922	201.97	246.154	232.986	164.278	185.333	110.778	106.596	425	363.678	288.163	71.4878	220.51	183.842	136.646	610.61	125.339	290.14	355.951	295.634	151.937	216.868	174.886	336.264	212.769	254.717	184.276	196.799	584.081	163.751	257.483	214.244	232.226	138.423	110.572	198.435	195.594	222.889	184.881	232.539	84.7896	132.208	535.253	127.601	161.09	182.823
Hippo signaling pathway	GLI2	0.0172654	61.4311	33.4481	96.0591	52.7473	39.2449	18.2531	20.7254	101.735	36.4116	115.761	13.6379	11.5584	4.7904	35.3064	49.1268	118.012	54.4735	28.1741	62.1001	113.394	80.2209	96.5496	35.8275	58.4335	87.9121	40.5274	34.5912	170.758	145.228	116.592	32.7501	70.8079	63.1152	66.0323	86.6229	133.672	34.8549	100.133	58.1614	53.1361	35.3954	58.2524	109.086	91.857	139.907	90.3458	110.466
Hippo signaling pathway	ITGB8	0.000729716	122.862	67.3881	335.468	166.633	311.972	110.368	232.762	399.835	301.319	170.109	78.1907	53.0092	124.919	120.166	35.3099	530.892	100.079	265.125	132.344	446.867	735.139	523.002	912.175	135.516	405.495	184.215	494.969	413.732	368.109	1164.24	660.386	112.005	135.495	142.452	942.404	685.301	173.879	555.407	500.563	230.896	661.399	358.576	541.28	203.078	949.88	138.335	694.214
Hippo signaling pathway	MAPK8	0.0157424	187.551	229.71	214.778	220.579	200.199	178.711	298.127	221.556	151.979	168.478	434.595	231.168	312.851	245.597	371.138	414.514	195.725	131.479	548.72	426.403	386.376	324.455	331.008	278.906	207.692	262.046	240.252	220.562	181.387	219.731	165.994	284.519	112.334	192.161	290.339	353.276	253.887	185.581	227.392	271.433	235.832	141.748	215.801	210.526	232.207	297.623	242.82
Hippo signaling pathway	PAK1	0.044777	761.838	105.755	433.005	662.138	1166.42	807.807	626.146	947.266	460.686	1270.65	942.38	1490.24	1883.74	416.554	303.972	1015.69	653.682	637.529	2059.82	791.412	1749.61	701.876	1025.36	370.493	1293.41	631.859	934.591	784.063	1361.59	803.812	1181.25	524.944	408.801	612.097	963.298	568.569	1215.57	1118.16	651.032	1339.63	460.14	871.197	658.073	515.392	736.132	620.255	715.071
Hippo signaling pathway	PAK3	0.00114315	2.7923	1.9675	3.4483	4.7952	2.4839	2.1225	2.3914	14.8565	2.6385	9.7826	0.4546	1.1957	0	8.0523	0	20.595	5.7007	2.8897	9.5016	8.3872	7.6276	17.5545	8.5606	4.5586	4.3956	1.3816	7.5472	26.3252	22.5252	2.2422	5.3836	2.8967	2.3162	3.7097	28.7292	26.18	5.5451	4.6729	28.5178	3.5607	4.1157	5.8252	25.4929	12.9096	40.1586	12.6169	16.9948
Hippo signaling pathway	SNAI2	0.00544959	155.439	30.4968	141.872	167.832	160.457	39.9022	24.3125	297.777	223.219	97.8261	22.7299	38.2623	73.3303	118.927	123.585	165.087	131.75	188.911	128.612	219.072	356.654	206.417	457.831	80.8123	229.67	185.137	309.434	318.036	726.141	74.5516	476.896	86.9005	423.277	230	479.69	216.216	192.89	218.291	254.034	104.629	356.834	376.052	548.394	269.116	187.838	199.392	196.213
Hippo signaling pathway	TEAD1	0.0161711	954.043	842.597	1166.5	872.328	923	775.546	909.924	1330.31	706.069	1442.93	415.047	711.837	506.679	619.721	489.733	1483.49	661.283	983.204	1697.74	2819.09	1332.46	1158.6	789.157	825.114	964.835	393.3	572.327	1404.84	2142.86	881.166	1342.75	728.355	704.69	633.613	2263.51	1880.96	644.42	1120.16	1232.27	1151.74	971.726	869.903	1853.28	1213.51	1732.65	1135.29	1341.56
Hippo signaling pathway	TGFB3	0.0263427	658.988	937.039	1003.94	1297.1	825.137	286.107	592.268	747.348	961.478	407.609	232.299	427.66	467.619	668.654	249.089	837.856	733.492	2000	2470.77	2042.1	640.715	1313.86	649.017	2182.76	874.725	478.5	952.83	797.581	1663.9	489.35	1969.49	550.37	534.453	758.259	1292.38	1437.13	983.86	548.064	2677.3	777.869	1145	812.298	1007.86	607.746	3166.7	729.075	866.995
Hippo signaling pathway	TP53BP2	0.0302573	813.031	798.819	816.256	1005	848.485	866.812	810.682	678.879	921.9	1032.61	984.657	1108.41	1717.92	1343.5	842.065	923.504	1009.03	863.283	1080.81	779.669	800.631	918.583	1248.26	1164.94	816.484	865.352	1002.52	1057.63	941.909	933.296	897.712	887.673	813.549	688.146	719.536	1146.69	1164.47	584.112	792.12	1111.48	941.269	675.728	783.759	1020.85	1020.16	556.044	1017.12
Hippo signaling pathway	TP73	0.00982555	30.7155	87.0635	22.6601	22.7772	73.0253	43.7226	11.1598	26.8064	38.5224	335.326	20.9115	132.324	56.748	9.9106	42.6022	57.2082	22.8029	37.2043	99.7673	60.3875	82.3251	25.1211	125.555	48.4874	56.5934	68.6203	83.0189	43.0452	57.4985	71.1883	65.9489	32.5072	22.0035	7.4194	72.2583	50.2041	139.816	74.7664	27.7674	16.7078	76.5527	17.4757	97.8217	27.3088	138.612	48.6651	181.793
Hippo signaling pathway	WNT1	0.00894759	0	0.9838	0.9852	0	0	0.849	0.7971	0.323	0.5277	2.1739	0	0.7971	0	0.3097	1.1514	0	0.6334	1.806	1.018	0.671	1.0521	0.3027	1.5853	0	0.5495	2.3027	0	0.3557	0.5928	1.1211	3.1404	0.6437	0	0	0	0.616	0.7922	3.3378	0.3752	1.0956	0.4116	1.2945	0	4.4687	1.2954	0.2253	2.3175
Hippo signaling pathway	WNT2B	0.00950351	92.1466	44.2696	81.7734	63.1369	24.8385	26.3185	18.334	48.4452	21.6359	77.1739	10.0011	14.7469	1.1055	79.2846	19.1902	96.4367	16.4687	16.6155	52.2591	127.149	201.21	32.6877	42.1687	64.2354	75.8242	46.5144	16.3522	115.973	171.903	249.44	34.096	55.6807	80.4864	70.4839	38.3056	124.124	17.0314	96.1282	42.7767	56.9707	34.1606	122.33	212.243	93.8431	58.9424	159.288	84.9742
Hippo signaling pathway	WNT7B	0.0237024	950.785	1183.96	697.537	511.888	556.384	462.271	1500.2	1654.57	537.203	921.739	599.614	1412.91	1838.05	60.0829	1148.34	195.162	315.439	313.166	216.162	261.679	442.662	243.947	316.106	503.937	74.7253	115.135	591.824	166.489	168.939	57.7354	322.118	872.546	32.4262	272.291	221.563	447.832	318.051	390.521	964.353	269.515	854.427	78.3172	313.622	67.0308	636.707	396.756	846.652
Hippo signaling pathway	WWTR1	0.011574	299.174	223.891	422.414	319.037	245.693	155.177	248.812	569.894	232.406	414.859	294.62	107.844	638.356	231.115	279.09	680.834	253.656	273.766	301.243	572.447	556.163	511.949	344.062	379.917	385.978	206.073	374.679	459.776	367.119	392.96	606.312	323.074	224.951	196.476	485.271	650.337	203.589	377.25	506.604	498.266	517.443	441.566	614.451	271.38	648.14	808.375	524.139
Hippo signaling pathway	YAP1	0.0208825	1920.19	2283.33	3008.37	2352.45	2045.7	2788.91	2003.99	2683.87	2243.8	1941.3	2300.72	2370.67	1869.74	2462.78	2246.02	3673.1	2153.6	2325.09	735.699	3392.77	2037.35	2890.44	3528.22	2483.22	2695.6	2229.01	1989.94	3166.13	3529.93	2700.11	3133.69	1771.81	2036.48	2424.28	4624.96	3860.48	2297.26	2543.39	3201.5	3883.59	2512.66	2082.85	3550.04	2390.27	3463.35	2784.95	2756.26
Hippo signaling pathway	YWHAE	0.022786	13684.7	11681.8	10224.1	14260.9	12185.8	13272.1	12875.6	11823.5	13261.7	12031	12710.1	13138.7	10939.1	14828.1	11334.9	10327.6	14129.5	15359.6	7496.8	7884.26	10931.6	11150.4	12276.5	12305	9395.05	14180	11091.8	10735.3	13093.1	12185.5	12829.5	11719.7	11067.7	12802.1	12102	10775.4	13498.4	10006	7611.63	9023.28	12161.6	11756	11330.1	10554.6	9759.5	12901.2	10851
Hippo signaling pathway	YWHAQ	0.0334714	7980.92	9184.46	9734.48	8488.71	10478.9	11885.3	10828.6	10932.2	8136.68	7911.41	11261.7	9515.34	12835.4	8821.04	12639.8	9603.47	7771.34	9423.51	9295.67	10391	7249.34	7799.64	9609.7	8639.45	10384.6	6203.92	9247.17	9573.82	7337.29	7250.56	7274.11	8497.91	7913.72	9037.52	9456.26	10352.8	8345.78	7212.95	9149.72	11133.1	8754.59	5097.73	8515.82	7830.19	8040.78	8250.54	8106.54
Wnt signaling related pathway	CAMK2G	0.0124339	789.296	704.378	1254.19	823.576	838.549	743.284	652.053	927.242	693.931	667.391	528.242	783.579	591.064	869.344	607.561	1318.08	715.123	841.611	1715.05	1096.37	888.743	993.947	801.205	782.843	965.385	774.166	777.987	1123.8	1432.13	1057.74	585.464	922.433	1055.59	1160.76	1396.85	1260.34	1004.46	1042.72	1443.15	613.257	842.08	882.201	1777.39	1282.03	1350.82	847.584	1165.69
Wnt signaling related pathway	CTNNBIP1	0.00352176	1210.94	1141.17	1367	956.643	1606.06	1172.45	1424.07	930.471	1194.2	1261.96	1111.94	1907.13	871.119	1996.67	1372.87	1333.12	895.645	1415.21	1199.58	1195	2332.98	1348.37	1235.26	1358.06	1171.98	2625.53	1571.7	1692.99	1138.71	1052.69	953.342	2038.3	1687.32	1362.94	2216.94	1241.86	2543.62	1254.34	1981.24	1437.69	2195.75	1978.64	1603.09	1573.98	1643.26	1364.65	1630.48
Wnt signaling related pathway	DVL2	0.00685845	1158.35	1108.71	984.236	860.34	742.673	989.49	952.172	1147.18	948.285	921.196	1063.76	720.606	854.906	840.851	653.234	558.025	578.306	744.447	220.574	557.242	901.105	793.583	887.128	904.683	822.528	1090.56	1026.42	827.463	1001.19	822.87	809.78	1051.5	767.226	857.307	781.782	759.529	751.361	1037.38	633.771	655.985	788.987	551.456	860.831	894.24	933.687	1048.78	1024.58
Wnt signaling related pathway	FZD7	0.0307248	551.018	264.634	891.133	497.502	513.661	265.307	310.482	870.399	481.794	634.239	130.015	170.187	40.9028	345.322	606.026	637.136	285.669	666.065	390.586	872.599	1133.09	646.792	433.735	523	690.11	373.036	440.88	748.488	1453.47	593.049	406.909	368.844	553.561	816.13	1126.97	941.249	288.345	917.89	1269.42	436.867	558.917	553.398	1212.4	606.256	1030.84	806.128	927.249
Wnt signaling related pathway	FZD8	0.0224834	78.185	125.922	201.97	246.154	232.986	164.278	185.333	110.778	106.596	425	363.678	288.163	71.4878	220.51	183.842	136.646	610.61	125.339	290.14	355.951	295.634	151.937	216.868	174.886	336.264	212.769	254.717	184.276	196.799	584.081	163.751	257.483	214.244	232.226	138.423	110.572	198.435	195.594	222.889	184.881	232.539	84.7896	132.208	535.253	127.601	161.09	182.823
Wnt signaling related pathway	GNAO1	0.0466183	66.0849	40.8264	92.1182	135.065	134.128	8.4898	43.4436	249.977	103.43	141.848	8.1827	23.1168	3.3164	53.8888	32.2395	197.777	72.209	108.362	46.1509	52.3358	119.674	207.93	86.5568	70.4517	141.209	46.5144	83.6478	147.279	565.501	167.601	78.5105	63.4052	104.806	126.871	264.657	189.112	85.1569	115.487	280.3	88.4689	97.1314	117.152	398.994	131.579	234.15	121.888	215.011
Wnt signaling related pathway	GPC4	0.0334497	274.578	113.625	425.616	174.625	463.984	323.038	621.762	479.608	182.058	230.435	252.301	45.835	36.1124	57.6052	314.719	542.334	71.5756	286.798	1577.27	1464.73	1245.66	374.092	648.066	328.637	220.879	151.057	336.478	422.981	543.568	437.78	277.703	234.631	183.555	724.13	548.031	433.356	457.867	489.319	2276.92	812.38	546.57	205.178	508.08	497.517	790.865	358.229	432.339
Wnt signaling related pathway	ITPR1	0.0262443	1162.07	205.607	1292.61	995.405	534.029	349.356	494.221	1164.3	452.243	533.696	84.5551	159.825	39.0603	826.604	224.909	1456.03	307.205	772.982	669.866	1687.83	1130.72	1185.53	716.55	1095.73	717.033	187.9	613.207	2661.33	1810.31	618.834	710.184	413.26	1080.49	915.549	2858.12	2200.35	674.918	963.284	1601.5	1096.96	759.765	913.916	3253.02	1366.43	2262.16	1254.48	1308.35
Wnt signaling related pathway	MAPK8	0.0157424	187.551	229.71	214.778	220.579	200.199	178.711	298.127	221.556	151.979	168.478	434.595	231.168	312.851	245.597	371.138	414.514	195.725	131.479	548.72	426.403	386.376	324.455	331.008	278.906	207.692	262.046	240.252	220.562	181.387	219.731	165.994	284.519	112.334	192.161	290.339	353.276	253.887	185.581	227.392	271.433	235.832	141.748	215.801	210.526	232.207	297.623	242.82
Wnt signaling related pathway	PDE6B	0.00170141	13.4962	4.427	18.7192	10.3896	25.8321	5.5184	21.9211	15.8254	28.496	52.1739	1.8184	4.7828	0.737	30.9706	4.2218	54.593	3.8005	31.0638	4.7508	22.1421	17.0963	8.4746	48.8269	16.1625	214.286	8.7502	27.673	94.2725	260.818	19.0583	39.031	10.2993	16.2131	90.1452	43.5291	30.184	6.7333	25.3672	84.0525	18.3511	31.2796	28.479	35.5715	16.3853	39.5108	11.2651	40.6846
Wnt signaling related pathway	PPP3CA	0.0277657	14668.1	18071.8	7949.75	13072.9	12707.4	15472.7	10120.4	16484	8053.3	13890.2	10715.3	13173	12616.5	11906.3	32327.8	10440.3	8607.44	10229.7	13050.5	20197.3	4245.92	11382.3	7075.46	17442.2	12900.5	13058.1	5054.72	7523.66	8803.79	5734.3	5609.24	6825.23	6140.13	8030.35	10258.5	17135.3	9634.62	7522.7	7084.8	13295.3	8927.04	1988.35	6526.19	5949.85	9470.62	11199.3	4945.76
Wnt signaling related pathway	PRICKLE2	0.0165937	223.386	83.1284	384.729	244.555	267.263	75.5595	138.302	437.622	284.96	407.065	24.5482	51.8135	21.7411	162.905	117.06	515.528	186.223	236.59	200.892	306.299	497.896	429.479	206.722	179.859	259.341	97.6342	411.95	467.094	547.718	217.489	480.485	176.054	207.296	378.758	744.347	598.753	175.463	397.864	553.471	220.214	345.31	262.136	677.638	339.126	605.617	397.882	459.376
Wnt signaling related pathway	PRKCB	0.0049404	177.312	45.7452	272.906	182.218	117.238	54.7594	44.6393	232.86	144.063	71.7391	15.0017	46.6321	33.5329	194.495	38.7642	443.609	104.513	144.483	55.3132	230.814	156.76	263.923	358.592	149.606	314.835	41.4485	54.717	431.519	749.852	88.565	145.805	193.756	188.188	223.323	540.196	676.677	144.965	180.908	234.146	217.201	80.6685	223.948	784.945	392.254	393.165	210.657	330.885
Wnt signaling related pathway	PRKG1	0.0384479	20.9424	11.3133	69.9507	58.7413	17.387	43.7226	11.1598	63.9477	7.3879	30.4348	3.6368	11.957	5.1589	2.7874	9.9789	71.9189	8.8678	16.2543	65.1542	89.9103	141.242	86.8644	11.7311	25.6942	34.0659	8.2897	15.7233	90.0036	61.6479	57.7354	26.0206	23.1735	19.1083	9.6452	97.5051	194.656	11.0902	23.3645	54.7842	45.1931	25.106	43.3657	52.7644	79.9404	93.2715	137.884	70.8119
Wnt signaling related pathway	RSPO2	0.0187205	32.1117	14.7565	98.0296	59.1409	37.2578	3.3959	9.167	76.5435	25.3298	30.4348	5.9098	1.9928	0	96.3185	23.7958	142.53	19.0024	45.512	1.3574	41.6003	24.4608	56.9007	11.4141	36.0547	63.7363	16.5794	44.6541	177.517	244.22	30.2691	30.0583	88.8317	141.864	199.952	131.458	113.036	32.0824	73.4312	212.383	23.2813	86.0189	15.534	158.293	134.062	77.0785	68.2663	75.7043
Wnt signaling related pathway	RSPO3	0.027563	14.427	9.8377	57.1429	3.996	127.173	7.6408	3.5871	105.288	109.763	64.1304	2.273	5.5799	2.948	87.9564	41.8346	135.338	16.4687	143.038	33.5951	53.6778	36.2967	20.8838	69.1186	61.7489	20.3297	24.4086	52.8302	129.847	191.464	144.619	66.3975	19.3112	71.8008	292.694	241.586	120.12	51.8863	104.806	373.734	128.732	100.013	25.2427	319.551	125.124	134.726	30.8663	209.346
Wnt signaling related pathway	SERPINF1	0.00600698	1063.41	909.493	1845.32	1550.45	1464.98	245.356	292.547	1460.14	1865.96	1493.48	95.4654	168.992	22.8466	1399.56	594.128	1859.43	1145.84	1583.53	893.155	1526.8	1072.59	1997.28	1742.23	1042.69	1654.95	806.403	1004.4	2011.74	8493.18	3103.14	1765.81	922.433	1140.13	3344.65	1671.08	2732.58	1074.56	1104.81	1747.09	1397.43	1273.82	1404.53	5229.01	3450.35	1929.55	1186.21	2403.48
Wnt signaling related pathway	SMURF2	0.0170947	572.426	584.358	478.325	666.933	563.835	674.092	509.366	559.058	541.952	558.696	582.793	674.372	954.767	1215.9	525.811	1432.82	855.107	470.291	585.03	670.301	704.629	1023.31	1048.83	634.066	681.319	463.302	603.145	809.676	1187.91	825.673	486.765	518.828	524.609	743.791	699.947	833.757	558.075	542.724	539.962	690.222	581.966	429.774	653.923	543.198	1046.07	486.876	588.125
Wnt signaling related pathway	SOST	0.0303556	0	0	0	0	0.4968	0	0	0.323	0.5277	0	0.4546	0	0	0	0	0.3269	0	0	0.3393	0.3355	0.526	0.6053	0	0.4144	1.0989	0.4605	0.6289	1.423	13.0409	0.5605	1.7945	0	0	0	1.3059	1.232	1.1882	0	0	0	0.4116	0	0	2.4826	0.9716	0.9012	0.2575
Wnt signaling related pathway	VANGL2	0.0372978	837.696	397.934	161.084	1163.64	290.611	19.5266	156.238	231.568	179.947	548.37	7.7282	48.2264	839.797	1721.34	340.05	1895.39	1164.21	296.189	352.24	638.765	810.626	593.523	1147.11	993.369	1032.97	303.495	388.05	827.463	1166.57	110.987	755.496	289.347	164.447	885.13	1049.92	392.7	806.813	677.57	647.279	808.819	634.235	249.191	666.966	759.682	894.823	320.829	1131.19
Wnt signaling related pathway	WNT1	0.00894759	0	0.9838	0.9852	0	0	0.849	0.7971	0.323	0.5277	2.1739	0	0.7971	0	0.3097	1.1514	0	0.6334	1.806	1.018	0.671	1.0521	0.3027	1.5853	0	0.5495	2.3027	0	0.3557	0.5928	1.1211	3.1404	0.6437	0	0	0	0.616	0.7922	3.3378	0.3752	1.0956	0.4116	1.2945	0	4.4687	1.2954	0.2253	2.3175
Wnt signaling related pathway	WNT2B	0.00950351	92.1466	44.2696	81.7734	63.1369	24.8385	26.3185	18.334	48.4452	21.6359	77.1739	10.0011	14.7469	1.1055	79.2846	19.1902	96.4367	16.4687	16.6155	52.2591	127.149	201.21	32.6877	42.1687	64.2354	75.8242	46.5144	16.3522	115.973	171.903	249.44	34.096	55.6807	80.4864	70.4839	38.3056	124.124	17.0314	96.1282	42.7767	56.9707	34.1606	122.33	212.243	93.8431	58.9424	159.288	84.9742
Wnt signaling related pathway	WNT7B	0.0237024	950.785	1183.96	697.537	511.888	556.384	462.271	1500.2	1654.57	537.203	921.739	599.614	1412.91	1838.05	60.0829	1148.34	195.162	315.439	313.166	216.162	261.679	442.662	243.947	316.106	503.937	74.7253	115.135	591.824	166.489	168.939	57.7354	322.118	872.546	32.4262	272.291	221.563	447.832	318.051	390.521	964.353	269.515	854.427	78.3172	313.622	67.0308	636.707	396.756	846.652
GPCR signaling related pathways	ADRA1A	0.0040633	15.8232	11.8052	69.4581	23.5764	16.3934	2.5469	5.9785	37.1413	7.9156	19.0217	1.8184	6.377	0	21.9891	3.0704	73.5534	6.3341	32.8698	17.9853	29.5228	37.3488	78.3898	9.5117	27.7663	30.7692	5.5265	5.6604	130.559	113.219	21.861	14.8048	20.2768	33.0052	54.5323	95.3287	173.404	19.0118	26.0347	103.94	21.0901	30.868	29.1262	170.743	56.1072	76.7547	41.6807	40.6846
GPCR signaling related pathways	ADRA1B	0.0113853	1.3962	1.9675	4.9261	5.1948	0.4968	1.698	6.377	2.2608	1.5831	3.8043	1.3638	1.1957	3.3164	1.2388	0.3838	2.6152	6.3341	0	22.0574	2.0129	14.2031	6.0533	0.9512	1.2433	8.2418	3.6843	0.6289	12.0953	24.3035	3.9238	1.7945	6.7589	4.0533	4.0806	2.6117	8.624	0	2.6702	10.8818	3.0129	0.4116	6.4725	11.2643	6.4548	3.2386	10.8145	4.635
GPCR signaling related pathways	ADRB3	0.0015077	0.9308	0.9838	0.4926	0.7992	0	0	0	0	0	0	0	1.1957	0.3685	0.3097	0.3838	3.9229	2.5337	0	0.6787	1.0065	0.7891	3.632	0.3171	0.8288	1.0989	0	0	4.6247	29.6384	0.5605	0	0.9656	1.1581	2.5968	2.6117	4.928	0.7922	0.6676	3.0019	0	0	0.6472	6.5214	4.4687	1.9432	0.4506	1.03
GPCR signaling related pathways	AGTR2	0.0167342	0	0	0	0	0	0	0	0	0	0	0	0	0	0	0	0	0.6334	0	1.3574	0	0	0	0	0	0	0	0	0	0	0	0.4486	0	0	0.371	0	0	0	0	0.3752	0	0	0	0	0	0	0.6759	0
GPCR signaling related pathways	AKAP11	0.0232679	637.58	390.556	881.281	1551.65	835.569	920.722	804.703	1122.64	404.222	1041.85	852.824	1888.8	975.034	1316.87	1135.67	2049.04	1438.48	631.75	1813.12	1429.51	1782.48	1762.11	1639.51	1111.07	812.088	903.577	913.837	1273.21	896.266	1263.45	869	678.468	923.567	407.323	2084.17	2164.32	1215.96	979.973	1168.11	1243.49	636.293	698.382	962.21	974.181	1326.2	933.649	885.277
GPCR signaling related pathways	AKAP4	0.0450257	0	0	0	0	0	0	0	0	0	0	0	0	0	0	0	0	0	0	0	0	0	0.3027	0.3171	0	0	0	0	0.3557	0	0	0	0	0	0	0	0	0	0	0.3752	0	0	0	0	0	0	0	0
GPCR signaling related pathways	AKAP5	0.0150491	70.2734	22.1348	35.468	52.3477	50.1739	48.392	49.4221	32.9428	29.0237	41.8478	43.6413	87.6843	53.8001	25.7056	25.7148	41.1899	233.729	18.4215	373.279	209.008	188.585	66.8886	116.36	23.622	25.2747	157.504	59.1195	27.0366	40.901	79.5964	23.3288	38.9443	28.3729	43.4033	52.2349	44.352	34.0628	38.7183	61.9137	99.9726	26.3407	88.6731	33.7929	52.1351	74.4877	317.675	58.7095
GPCR signaling related pathways	AKAP7	2.43515e-07	143.339	181.505	133.498	170.629	130.651	67.0697	198.087	95.9216	128.232	173.37	158.2	142.686	250.207	326.12	150.067	891.795	237.53	232.617	179.174	1084.29	224.356	822.034	700.38	124.741	150	317.311	220.126	297.403	867.22	176.57	282.638	293.209	502.606	481.517	929.346	280.28	349.341	349.132	141.088	80.7998	244.887	239.482	246.036	586.395	544.408	199.166	375.947
GPCR signaling related pathways	ARHGEF7	0.00118592	1093.19	1388.59	784.729	1805.39	1497.27	1676.74	1598.64	1835.43	1182.06	2288.59	759.177	1521.72	1301.52	3806.28	1463.06	4654.79	4042.44	1532.24	1238.27	1265.45	1623.62	1963.38	2494.61	2435.14	1550.55	2408.16	2352.83	2031.66	1496.15	1882.85	3485.42	1880.59	3066.01	3030.81	3219.41	1467.62	2144.77	2857.14	1009.01	937.825	1894.89	1477.67	1685.5	3429	2386.84	1714.32	1655.97
GPCR signaling related pathways	AVPR2	0.0233321	30.7155	6.8864	32.0197	41.5584	28.8127	19.1021	32.6823	32.6198	17.4142	16.8478	8.6373	6.7756	1.1055	7.7426	11.5141	8.1726	12.6683	6.1405	10.1803	7.7162	9.9947	25.1211	5.707	4.9731	34.6154	5.5265	12.5786	15.297	9.4843	12.3318	4.9349	18.3457	13.3179	19.6613	10.0117	17.556	17.8235	17.3565	12.758	9.0386	11.1125	23.301	34.3858	32.7706	13.926	30.1904	33.4747
GPCR signaling related pathways	CAMK2G	0.0124339	789.296	704.378	1254.19	823.576	838.549	743.284	652.053	927.242	693.931	667.391	528.242	783.579	591.064	869.344	607.561	1318.08	715.123	841.611	1715.05	1096.37	888.743	993.947	801.205	782.843	965.385	774.166	777.987	1123.8	1432.13	1057.74	585.464	922.433	1055.59	1160.76	1396.85	1260.34	1004.46	1042.72	1443.15	613.257	842.08	882.201	1777.39	1282.03	1350.82	847.584	1165.69
GPCR signaling related pathways	CCK	0.000337525	12.5654	54.1072	12.8079	39.1608	25.3353	0.4245	3.1885	3.8756	31.1346	0.5435	0	1.9928	0	12.3882	30.7043	175.221	45.6057	166.516	40.7213	1.0065	37.6118	97.155	3.1706	81.2267	808.242	362.444	260.377	947.705	91.2863	76.7937	13.0103	17.702	177.765	878.452	986.804	119.504	139.816	15.3538	57.0356	10.1342	35.3954	748.867	244.851	39.7219	266.212	305.283	69.2669
GPCR signaling related pathways	CCKAR	0.0281459	0	0.4919	0.4926	0.3996	0	0.4245	0	0.6459	0	0	0	0	0	0	0.3838	2.6152	0	2.8897	0	11.4065	0	0.3027	0.3171	0	0	0	0	0	1.7783	1.1211	0.4486	0	0	1.1129	0.4353	0	0	0.6676	0	7.3952	0.4116	0	0.5929	0.993	3.8863	2.253	0.7725
GPCR signaling related pathways	CCL28	0.000730447	10.2385	1.4757	14.7783	20.7792	38.2514	2.9714	18.334	23.5767	8.4433	48.913	20.0023	30.291	1.474	11.4591	6.5247	54.593	70.9422	28.1741	58.0279	60.3875	45.5024	25.7264	36.7787	6.2163	30.2198	13.8162	24.5283	30.5941	27.8601	14.0135	23.7775	16.4145	23.7406	20.4032	36.5644	17.864	13.0706	26.7023	21.0131	47.6582	39.0995	37.5405	45.6501	17.3784	40.1586	36.7241	30.6422
GPCR signaling related pathways	CDK5	0.015955	495.637	372.848	368.966	372.428	577.248	473.308	292.945	301.006	468.602	264.13	293.67	326.425	177.245	373.505	474.765	239.621	250.198	324.363	163.225	260.002	213.572	326.271	255.232	337.339	418.132	391.918	289.937	263.607	336.692	440.583	159.713	355.97	303.416	464.452	214.163	243.32	425.785	299.733	442.777	413.311	355.6	325.566	406.701	462.761	285.968	376.028	320.327
GPCR signaling related pathways	CHRM2	0.0353824	0	2.4594	1.4778	3.996	0	0.4245	0.3986	0	0	59.7826	0	0	0	0	0	2.2883	2.5337	18.4215	0	53.6778	0.263	7.5666	0.3171	0	7.1429	0	0	2.4902	0.5928	0	0	0.3219	0	0	0.4353	3.388	0	0.6676	1.5009	0	0	2.589	0	0.4965	1.9432	5.6325	0.2575
GPCR signaling related pathways	CXCL10	0.028362	53.5195	218.888	142.857	234.166	312.469	21.6491	115.185	248.685	82.3219	467.935	17.7293	311.678	689.452	130.696	127.423	86.9565	239.43	62.8499	133.702	241.214	197.265	155.872	1991.44	47.2441	169.231	127.109	198.113	89.6478	160.047	530.83	984.746	208.561	104.227	76.7904	272.492	197.12	271.71	306.409	210.131	2759.79	78.199	194.175	13.0429	216.981	107.521	163.794	337.579
GPCR signaling related pathways	CXCL13	0.00395479	16.2885	4.9188	4.9261	13.986	8.4451	5.9429	3.5871	28.4212	78.628	4.8913	0.4546	53.4077	41.6398	290.814	1362.89	32.3635	79.1766	50.9301	38.3459	30.1937	12.6249	329.601	304.375	1.6577	97.8022	1.8422	13.2075	258.627	1632.48	57.7354	111.709	85.6131	123.914	15.9516	8.2705	166.936	25.349	14.6862	5.6285	939.742	9.4662	18.7702	142.879	90.864	8.7442	2.0277	67.4644
GPCR signaling related pathways	CXCL3	0.0355189	6.5154	0.9838	8.3744	35.5644	12.4193	0	21.9211	15.8254	12.6649	2.1739	0.4546	1.1957	11.0548	5.265	0.7676	131.416	3.1671	43.3448	3.3934	6.7097	14.7291	1.816	90.6785	25.6942	1.0989	15.6583	91.8239	9.9609	1.1855	10.6502	6.7295	2.253	3.4742	0	0.8706	18.172	1.5843	6.008	2.6266	1.9173	42.3921	16.8285	15.4143	3.4757	30.1189	2.4783	108.921
GPCR signaling related pathways	CXCL6	0.0156034	53.9849	0.4919	14.7783	15.984	21.8579	4.2449	25.9067	40.371	45.3826	4.8913	2.273	4.7828	7.3699	5.8844	7.6761	90.2256	4.4339	64.656	10.5197	24.155	78.1168	4.54	310.399	16.1625	15.9341	51.5803	46.5409	25.9694	28.4529	28.5874	119.336	14.4834	6.9485	5.1936	18.2822	65.6041	7.5255	37.3832	42.7767	10.4081	232.951	50.4854	50.393	11.4201	135.373	11.4904	58.967
GPCR signaling related pathways	CYP26B1	0.0170771	8.377	50.1722	101.478	49.1508	27.3224	35.2328	47.4293	21.6389	3.6939	177.717	96.8292	132.324	5.1589	34.9967	13.0493	123.243	378.147	3.2509	74.9951	39.2519	69.7002	13.3172	28.2181	8.7029	126.374	51.5803	74.2138	83.2444	102.549	100.897	13.9076	12.8742	61.9572	26.3387	35.2586	39.116	26.9334	59.4126	31.5197	12.0515	25.9292	19.4175	95.4503	172.294	105.254	109.496	113.556
GPCR signaling related pathways	DGKE	0.0098598	356.952	58.0423	260.591	123.876	209.141	261.487	214.428	166.652	112.401	179.348	128.196	142.288	489.36	166.622	149.3	398.496	225.495	230.811	576.207	394.532	470.805	410.412	314.521	275.591	219.78	273.099	250.943	363.572	382.336	230.942	187.977	151.593	242.038	339.436	533.667	425.348	350.926	263.017	348.593	329.499	215.253	338.511	275.679	238.828	270.099	263.377	277.582
GPCR signaling related pathways	DGKH	0.0305248	10.2385	8.8539	9.3596	9.99	14.9031	16.5552	11.5584	23.8996	8.4433	10.3261	7.2736	27.1024	25.4261	11.4591	9.5951	29.7483	7.601	5.0569	25.4508	31.5357	54.9711	13.9225	19.9746	7.4596	8.7912	9.6713	15.7233	19.9217	6.5205	7.8475	30.507	8.6901	5.2113	8.1613	27.8586	49.28	5.149	6.6756	17.2608	30.4026	12.3472	18.123	9.4857	7.4479	37.2438	30.4157	15.9649
GPCR signaling related pathways	FZD7	0.0307248	551.018	264.634	891.133	497.502	513.661	265.307	310.482	870.399	481.794	634.239	130.015	170.187	40.9028	345.322	606.026	637.136	285.669	666.065	390.586	872.599	1133.09	646.792	433.735	523	690.11	373.036	440.88	748.488	1453.47	593.049	406.909	368.844	553.561	816.13	1126.97	941.249	288.345	917.89	1269.42	436.867	558.917	553.398	1212.4	606.256	1030.84	806.128	927.249
GPCR signaling related pathways	FZD8	0.0224834	78.185	125.922	201.97	246.154	232.986	164.278	185.333	110.778	106.596	425	363.678	288.163	71.4878	220.51	183.842	136.646	610.61	125.339	290.14	355.951	295.634	151.937	216.868	174.886	336.264	212.769	254.717	184.276	196.799	584.081	163.751	257.483	214.244	232.226	138.423	110.572	198.435	195.594	222.889	184.881	232.539	84.7896	132.208	535.253	127.601	161.09	182.823
GPCR signaling related pathways	GALR1	0.0178267	1.3962	0	3.4483	5.994	4.9677	2.1225	0.7971	0.6459	1.5831	1.087	0	0	0	0	0.3838	5.8843	0	6.5017	0	0	0.263	2.4213	3.8047	3.3154	2.1978	3.6843	1.8868	0.7115	7.706	30.2691	3.1404	0.3219	9.2646	9.6452	9.5764	13.86	3.1686	2.6702	15.3846	1.9173	2.881	3.2362	17.1929	7.4479	7.4488	0.4506	2.3175
GPCR signaling related pathways	GNAL	0.000733084	79.1158	24.5942	89.1626	113.487	69.5479	21.2246	41.8493	140.814	60.686	63.587	134.106	189.717	4.7904	45.217	16.5036	198.758	13.3017	153.874	28.5049	86.8909	145.45	161.32	125.555	87.443	81.8681	47.4355	106.289	161.508	189.686	65.583	121.579	42.8066	59.062	87.1775	468.808	222.068	84.7609	133.511	248.405	43.0019	121.003	91.2621	406.701	111.221	257.468	104.765	237.67
GPCR signaling related pathways	GNAO1	0.0466183	66.0849	40.8264	92.1182	135.065	134.128	8.4898	43.4436	249.977	103.43	141.848	8.1827	23.1168	3.3164	53.8888	32.2395	197.777	72.209	108.362	46.1509	52.3358	119.674	207.93	86.5568	70.4517	141.209	46.5144	83.6478	147.279	565.501	167.601	78.5105	63.4052	104.806	126.871	264.657	189.112	85.1569	115.487	280.3	88.4689	97.1314	117.152	398.994	131.579	234.15	121.888	215.011
GPCR signaling related pathways	GPR31	0.0413907	0	0.4919	0.4926	0.3996	0	0.4245	0.3986	0	0	0.5435	0	0	0.3685	1.2388	0	2.2883	0	0	0	0.3355	0.526	0.3027	1.9023	0	0	0	0	0	0	0.5605	1.7945	0.3219	1.7371	0.371	0	0	0	0	0	1.6434	0	0	1.1857	0	0.9716	0	1.03
GPCR signaling related pathways	GPR39	0.012413	2.5317	1.5642	3.2217	23.8042	28.768	0	15.3368	8.8041	5.4406	234.277	0	2.5787	0	6.4605	0.7906	18.5453	8.8678	46.6932	1.2352	76.7357	16.0547	6.4346	14.6925	3.9577	48.7637	11.6977	15.2201	17.8335	294.724	11.9002	9.4572	6.5208	7.1859	2.9195	41.8358	12.1722	16.0491	29.6395	8.1313	7.2884	16.4959	43.2104	18.349	2.3237	23.1559	22.3995	36.199
GPCR signaling related pathways	HTR1E	0.0398663	0.4654	1.4757	0	0	0	0	0.3986	0	0	2.1739	0	0	0	0	0	0	0	0	0.6787	0	5.5234	0.6053	0.3171	0	0.5495	0	0	3.5575	4.7421	0	0.4486	0.6437	0	0.371	0.4353	0.308	0	1.3351	0.3752	0.2739	0	0.6472	0	1.4896	0.6477	0.9012	0.515
GPCR signaling related pathways	HTR4	0.00110348	0.4654	0.4919	0.9852	0	0	0.849	0.7971	0.323	0	1.6304	0	0.3986	0.3685	0.3097	4.9894	1.6345	0	0	0.3393	8.7226	0	0.6053	1.5853	0.4144	1.0989	0.4605	0	1.423	1.1855	2.8027	1.7945	1.2874	0.579	0.371	1.3059	0.616	0	1.3351	0.3752	1.0956	1.6463	0.6472	0	2.9791	1.6193	3.1542	2.06
GPCR signaling related pathways	ITPR1	0.0262443	1162.07	205.607	1292.61	995.405	534.029	349.356	494.221	1164.3	452.243	533.696	84.5551	159.825	39.0603	826.604	224.909	1456.03	307.205	772.982	669.866	1687.83	1130.72	1185.53	716.55	1095.73	717.033	187.9	613.207	2661.33	1810.31	618.834	710.184	413.26	1080.49	915.549	2858.12	2200.35	674.918	963.284	1601.5	1096.96	759.765	913.916	3253.02	1366.43	2262.16	1254.48	1308.35
GPCR signaling related pathways	LPAR6	0.0432431	430.483	386.621	547.783	542.258	614.506	279.74	172.977	346.868	1071.77	435.87	229.571	194.101	90.6495	477.256	134.715	672.769	1237.05	1080.37	357.33	538.791	669.385	607.143	1545.66	1329.47	635.714	691.269	1314.47	633.227	388.263	633.408	1208.61	391.053	773.596	403.613	923.687	560.253	638.875	933.912	466.041	388.935	1005.06	467.961	426.265	603.774	848.188	296.271	601.515
GPCR signaling related pathways	LTB4R2	0.0127043	28.6213	28.3817	20.9704	11.6404	20.2037	23.6781	12.487	26.2089	31.0976	28.9239	12.0468	33.5273	27.9503	7.4546	10.6966	21.0363	63.5186	13.7511	32.6382	23.7994	27.8406	14.2161	43.7064	22.673	32.0879	39.703	32.3522	22.9349	20.5335	71.3789	55.2714	18.1236	25.4661	8.5063	25.7083	25.1605	29.6227	58.3244	25.3921	10.126	37.3956	63.6764	19.4398	29.2602	25.8084	10.2445	25.6236
GPCR signaling related pathways	MCF2	0.00376143	1.8615	2.9513	9.8522	3.1968	3.9742	1.2735	0.3986	2.2608	1.0554	5.4348	0.9092	0.3986	0.737	9.9106	0.3838	10.7878	4.4339	3.6121	0	6.3742	2.1042	6.3559	2.8535	2.0721	14.8352	1.8422	3.1447	9.9609	32.6023	30.8296	2.2432	7.4026	9.8437	5.1936	15.2352	13.552	5.149	2.0027	1.1257	2.1912	1.6463	3.2362	1.7786	8.9374	5.8295	1.5771	1.545
GPCR signaling related pathways	NET1	0.00763574	1249.1	3131.82	2660.59	2791.61	3402.88	2161.51	2352.33	1750.16	2555.67	5329.89	3479.49	4645.28	1709.81	3060.51	2666.28	4236.68	2564.69	1581.36	12742	10850.6	5957.65	3580.81	3277.11	1816.83	2989.01	2424.28	3879.87	2899.32	2918.79	4191.14	1820.55	2313.81	3027.79	3428.12	3270.34	2202.82	1911.87	3129.51	3625.89	3599.84	2792.53	3041.42	2394.56	3852.04	3313.41	2394.95	3315.03
GPCR signaling related pathways	NPBWR1	0.0317418	4.1885	8.8539	7.8818	2.3976	2.4839	2.5469	2.79	5.4905	1.5831	0.5435	0	0.7971	0.737	0.3097	0.7676	0.6538	0	1.806	2.0361	0.671	2.3672	0.3027	1.5853	2.901	1.0989	0.9211	0.6289	0.7115	0	2.8027	8.9726	9.6556	0	0	0	0.924	0.7922	6.6756	0.3752	1.9173	1.2347	0	2.9643	0	1.9432	13.5181	3.3475
GPCR signaling related pathways	OPN1LW	0.0468582	0	0	0	0	0	0	0	0	0	0	0	0	0	0	0	0	0	0	0	0	0	0	0	0	0	0	0	0	0.5928	0	0	0	0	0	0	0	0	0.6676	0	0	0	0	0	0	0	0	0
GPCR signaling related pathways	OPN4	0.0205244	0	0	0	0	0	0	0	0	0	0	0	0	0	0	0	0.3269	0	0	0	0	0	0	0	0	0	0	0	0	0.5928	0	0	0	0	0	0	0	0	0	0	0	0	0.6472	0	0.4965	0	0.2253	0.2575
GPCR signaling related pathways	P2RY10	0.0415489	6.9808	2.9513	13.7931	12.3876	9.9354	2.9714	6.7756	20.67	11.0818	17.3913	0	9.9641	5.8959	17.3435	2.6866	29.0945	9.5012	6.1405	3.7328	27.5099	30.2472	10.2906	64.3627	4.1442	17.033	2.3027	11.9497	8.1821	5.3349	7.8475	18.3939	7.0808	0.579	4.0806	12.6234	24.332	11.0902	13.3511	4.878	52.8622	4.1157	14.2395	3.5572	12.4131	18.1361	14.6446	38.6247
GPCR signaling related pathways	P2RY12	0.0124392	0.9308	3.4432	4.9261	8.3916	10.929	6.7919	9.5656	12.2728	2.1108	5.9783	0.4546	3.1885	0.3685	5.8844	11.1303	25.8254	6.9675	7.5853	3.7328	12.7485	12.3619	6.6586	30.7546	3.3154	5.4945	2.7632	5.0314	16.0085	7.1132	38.6771	8.524	6.4371	4.0533	0.371	22.6351	23.716	10.298	4.6729	13.5084	20.2684	9.0546	5.8252	14.8215	2.4826	25.261	6.9843	13.3899
GPCR signaling related pathways	PAK1	0.044777	761.838	105.755	433.005	662.138	1166.42	807.807	626.146	947.266	460.686	1270.65	942.38	1490.24	1883.74	416.554	303.972	1015.69	653.682	637.529	2059.82	791.412	1749.61	701.876	1025.36	370.493	1293.41	631.859	934.591	784.063	1361.59	803.812	1181.25	524.944	408.801	612.097	963.298	568.569	1215.57	1118.16	651.032	1339.63	460.14	871.197	658.073	515.392	736.132	620.255	715.071
GPCR signaling related pathways	PDE1C	0.0235009	1.8615	1.9675	9.3596	4.3956	6.9548	1.698	13.1527	2.9067	0.5277	2.7174	0.4546	0.3986	1.1055	2.7874	0.3838	13.73	6.3341	1.4448	8.823	6.7097	17.0963	33.8983	2.2194	1.2433	11.5385	0.4605	1.2579	9.2494	18.3758	3.3632	0.4486	1.9311	1.7371	2.2258	3.047	12.628	1.1882	6.008	4.878	3.2868	4.1157	28.479	10.6715	9.434	7.4488	6.3084	6.9524
GPCR signaling related pathways	PDE4D	0.0017037	576.647	402.873	686.286	487.512	903.259	332.534	614.404	727.247	572.792	1292.78	704.321	419.167	307.556	847.358	397.325	1325.45	360.804	1399.71	171.549	1325.11	1044.67	721.525	851.902	746.668	739.071	411.957	614.912	1025.62	777.137	404.966	692.333	884.149	787.29	457.181	1679.3	1063.04	1098.89	853.171	997.546	214.243	750.316	937.262	1027.98	694.345	1354.24	947.221	702.173
GPCR signaling related pathways	PENK	0.013241	26.9924	6.3945	111.818	14.7812	26.8256	1.698	5.9785	7.1053	36.4116	9.7826	0.4546	3.1885	0.3685	139.058	0	22.5564	47.4996	115.225	6.1082	2.3484	59.7054	138.611	8.2435	19.8923	145.049	28.0929	16.3522	160.772	818.571	11.2108	42.62	30.898	35.9004	202.549	86.6229	67.7601	32.8745	24.032	27.3809	62.4486	52.6815	25.2427	46.243	189.171	17.1645	18.2494	19.5698
GPCR signaling related pathways	PIK3R1	0.0066474	753.927	1796.36	1561.08	1259.54	1098.86	974.208	1210.84	1488.24	737.203	767.391	1743.38	1297.33	971.718	970.308	1276.53	2751.88	1248.46	832.22	1106.26	3504.49	2359.55	2187.35	2023.78	830.916	1708.24	822.522	1260.38	2564.92	2307.05	1113.79	1039.93	1104.6	1085.12	1805.5	3032.24	3278.05	1638.18	1408.54	1502.44	1337.99	943.327	1105.5	1909.01	1411.12	2277.06	1709.36	1667.56
GPCR signaling related pathways	PPP3CA	0.0277657	14668.1	18071.8	7949.75	13072.9	12707.4	15472.7	10120.4	16484	8053.3	13890.2	10715.3	13173	12616.5	11906.3	32327.8	10440.3	8607.44	10229.7	13050.5	20197.3	4245.92	11382.3	7075.46	17442.2	12900.5	13058.1	5054.72	7523.66	8803.79	5734.3	5609.24	6825.23	6140.13	8030.35	10258.5	17135.3	9634.62	7522.7	7084.8	13295.3	8927.04	1988.35	6526.19	5949.85	9470.62	11199.3	4945.76
GPCR signaling related pathways	PRKCB	0.0049404	177.312	45.7452	272.906	182.218	117.238	54.7594	44.6393	232.86	144.063	71.7391	15.0017	46.6321	33.5329	194.495	38.7642	443.609	104.513	144.483	55.3132	230.814	156.76	263.923	358.592	149.606	314.835	41.4485	54.717	431.519	749.852	88.565	145.805	193.756	188.188	223.323	540.196	676.677	144.965	180.908	234.146	217.201	80.6685	223.948	784.945	392.254	393.165	210.657	330.885
GPCR signaling related pathways	PRKD3	0.00705049	449.098	502.214	563.054	561.039	480.874	489.863	583.499	665.638	425.858	546.739	276.395	492.228	769.784	619.411	351.18	1005.23	469.992	379.628	769.973	1032.63	834.561	655.569	711.794	425.611	552.198	523.633	510.063	671.647	708.951	364.91	649.17	401.674	536.19	401.017	930.216	887.657	619.863	440.587	608.63	733.772	443.265	600	705.502	540.218	811.592	682.212	718.676
GPCR signaling related pathways	PROK1	0.00854873	18.6155	3.9351	56.1576	6.3936	15.3999	1.698	8.7684	23.5767	52.2427	21.7391	2.273	0.3986	0	138.438	0.3838	80.7453	18.369	79.4654	2.7148	4.3613	27.354	17.2518	8.2435	40.6133	8.7912	24.4086	13.8365	219.139	467.101	20.7399	21.0857	14.1616	199.189	904.791	224.175	79.7721	67.7295	102.136	92.6829	3.5607	51.4467	22.0065	1310.81	94.8361	103.959	8.1108	25.7498
GPCR signaling related pathways	PROKR2	0.0244771	0	0	0	0	0	0	0	0	0	0	0	0	0	0	0	0	0	0	0	0.3355	0	0	0.3171	0	0	0	0	0.3557	0	0	0	0	0	0	0	0.308	0	0	0	0	0.4116	0	0	0	0	0	0
GPCR signaling related pathways	PTGER3	0.00226093	39.9255	7.5258	72.9015	38.0859	23.686	7.0508	33.9219	39.5119	87.2401	20.712	37.3952	128.29	1.1239	44.5202	11.9363	74.6976	17.8432	34.1557	53.2635	268.359	115.587	27.2064	15.9924	43.0087	33.478	20.4525	30.8113	161.579	126.064	117.248	42.7591	29.2404	141.065	212.439	82.9577	128.436	19.4197	21.976	82.6529	44.7083	61.2916	53.5275	343.224	136.887	60.0306	100.692	247.728
GPCR signaling related pathways	PTH2R	0.0158904	3.7231	0.4919	12.8079	2.7972	1.9871	4.2449	3.1885	1.6148	8.971	3.2609	4.546	9.5656	2.948	9.9106	6.1409	7.5188	16.4687	8.669	13.9131	93.9361	2.3672	5.7506	5.39	9.9461	3.2967	4.1448	5.0314	9.6051	90.1008	2.2422	0	5.4715	15.055	4.4516	13.494	2.156	3.1686	2.6702	43.152	2.4651	8.6431	28.479	7.1143	24.8262	2.267	3.1542	1.545
GPCR signaling related pathways	TAC1	0.030162	0.9308	3.4432	11.33	0.3996	2.9806	0	0.3986	0.9689	0	9.7826	0.4546	1.5943	0	0.3097	1.5352	3.5959	0	3.9733	2.3754	3.6903	12.6249	6.9613	3.1706	4.9731	14.2857	3.6843	9.434	0.7115	1.7783	7.287	2.6918	0.9656	5.2113	1.1129	50.0584	2.464	0.7922	6.6756	3.7523	20.2684	16.463	4.5307	0.5929	2.4826	0.6477	2.4783	4.3775
GPCR signaling related pathways	TAS2R10	0.00810676	0	0	0	0	0.9935	0	0.7971	0	0	0	0.4546	1.1957	0.737	0.3097	0	0.3269	0	0.3612	0	0.3355	0	2.1186	1.5853	0	1.0989	0.4605	0.6289	0.3557	0.5928	0.5605	0.4486	1.6093	0.579	0	0.4353	1.232	1.5843	4.6729	0	0	1.6463	0	0.5929	1.4896	0	0.2253	0.515
GPCR signaling related pathways	TAS2R14	0.0386632	6.3991	9.1048	3.6749	2.9331	5.9066	2.4705	4.2766	2.9132	1.314	23.8152	6.5689	9.5536	10.5573	2.7688	4.7323	4.8218	9.4949	3.4856	1.9139	2.0901	2.8958	4.8154	8.8015	2.3166	8.489	10.4773	6.2201	4.7777	3.9182	10.2298	14.262	4.9179	11.7313	7.0595	8.6405	2.6888	7.3314	9.0454	3.7636	1.8461	11.487	2.3883	1.1442	13.2324	4.9939	2.2936	2.3226
GPCR signaling related pathways	TAS2R31	0.0213448	0.9308	2.4594	2.9557	1.5984	2.4839	1.2735	1.9928	2.2608	1.5831	13.0435	0.9092	3.5871	1.474	4.0262	0.7676	1.3076	11.4014	3.6121	2.0361	4.0258	1.5781	2.724	2.5365	2.4865	2.1978	1.8422	3.7736	0.3557	2.3711	15.6951	4.0377	2.253	2.8952	0.371	3.9176	4.62	3.5647	4.6729	5.2533	0.8217	1.6463	1.2945	0	2.4826	1.9432	0.6759	0.7725
GPCR signaling related pathways	TAS2R40	0.0163373	0	0	0	0	0	0	0	0	0	0	0	0	0	0	0	0	0	0	0	0	0	0	0	0	0	0	0	0.3557	0	0.5605	0	0	0	0	0.4353	0	0	0.6676	0	0	0	0.6472	0	0	0.3239	0	0
GPCR signaling related pathways	TAS2R43	0.00852998	0	0.4919	0	0.3996	0	0	0	0.323	0.5277	2.7174	0	0.3986	0.737	0.3097	0.3838	0.9807	1.2668	0.3612	1.018	0	0	0	0	1.6577	2.7473	0	0	0.3557	0.5928	0.5605	0.4486	0.3219	0	0	1.3059	0.308	0.3961	0	0	0.2739	0	0	0	2.4826	0.3239	0.4506	0
GPCR signaling related pathways	TIAM2	0.0265065	79.5718	27.639	38.5961	83.6763	63.6513	48.7231	127.126	81.6625	41.6939	205.755	62.3798	32.5149	20.0719	118.174	20.7753	76.2504	160.697	41.5062	231.779	98.3645	155.544	76.1985	113.729	51.7944	72.4341	42.6505	144.258	56.3892	122.377	130.135	121.095	37.0261	41.0944	43.4515	93.6876	69.1553	131.641	114.606	326.51	62.2542	75.0217	44.1294	121.815	85.4369	129.466	44.7877	102.067
GPCR signaling related pathways	TRPC3	0.0075217	1.3962	0	1.4778	1.1988	4.9677	1.2735	1.1957	1.2919	0.5277	3.8043	0	0	1.1055	0	1.1514	4.5767	1.2668	3.6121	3.7328	2.0129	5.2604	1.816	5.0729	0.4144	3.8462	0.9211	1.2579	1.423	2.9638	2.2422	1.3459	0.3219	0	2.2258	2.1765	4.928	1.9804	2.0027	7.8799	4.6563	1.6463	3.2362	2.9643	2.9791	8.4203	2.253	1.545
GPCR signaling related pathways	TRPC6	0.00566713	33.0425	9.3458	51.7241	26.7732	17.8838	42.4491	35.8709	31.0049	17.942	33.1522	7.2736	12.3555	21.0041	14.8659	14.5845	32.6904	12.6683	26.3681	40.382	63.0714	59.7054	30.569	456.563	35.6403	32.967	32.2377	31.4465	51.5831	162.418	39.7982	30.0583	19.6331	64.2733	61.9517	56.5878	74.5361	15.8432	48.0641	31.8949	48.206	51.0352	18.123	164.222	41.708	53.1129	64.2109	34.5047
GPCR signaling related pathways	WNT1	0.00894759	0	0.9838	0.9852	0	0	0.849	0.7971	0.323	0.5277	2.1739	0	0.7971	0	0.3097	1.1514	0	0.6334	1.806	1.018	0.671	1.0521	0.3027	1.5853	0	0.5495	2.3027	0	0.3557	0.5928	1.1211	3.1404	0.6437	0	0	0	0.616	0.7922	3.3378	0.3752	1.0956	0.4116	1.2945	0	4.4687	1.2954	0.2253	2.3175
GPCR signaling related pathways	WNT2B	0.00950351	92.1466	44.2696	81.7734	63.1369	24.8385	26.3185	18.334	48.4452	21.6359	77.1739	10.0011	14.7469	1.1055	79.2846	19.1902	96.4367	16.4687	16.6155	52.2591	127.149	201.21	32.6877	42.1687	64.2354	75.8242	46.5144	16.3522	115.973	171.903	249.44	34.096	55.6807	80.4864	70.4839	38.3056	124.124	17.0314	96.1282	42.7767	56.9707	34.1606	122.33	212.243	93.8431	58.9424	159.288	84.9742
GPCR signaling related pathways	WNT7B	0.0237024	950.785	1183.96	697.537	511.888	556.384	462.271	1500.2	1654.57	537.203	921.739	599.614	1412.91	1838.05	60.0829	1148.34	195.162	315.439	313.166	216.162	261.679	442.662	243.947	316.106	503.937	74.7253	115.135	591.824	166.489	168.939	57.7354	322.118	872.546	32.4262	272.291	221.563	447.832	318.051	390.521	964.353	269.515	854.427	78.3172	313.622	67.0308	636.707	396.756	846.652
GPCR signaling related pathways	XK	0.0243454	48.8656	0.9838	61.0837	40.7592	28.8127	2.5469	25.5082	33.5887	15.8311	33.6957	0.4546	16.3412	1.8425	14.5562	7.2923	129.781	39.2716	54.5422	66.1722	97.9619	236.191	54.4794	19.6576	14.5048	31.8681	18.4215	22.6415	60.121	46.2359	4.4843	18.3939	44.7377	71.2218	54.1613	143.646	53.9001	30.8941	42.7236	69.4184	43.2758	29.6333	30.4207	58.1002	29.2949	54.0845	19.8265	28.0672
Notch signaling pathway	CNTN1	0.0101216	221.989	122.479	299.015	270.529	160.457	94.2371	39.0594	430.84	55.409	226.63	19.0931	28.6967	0	225.156	113.99	733.573	126.049	64.2947	50.223	469.01	616.255	419.491	253.329	149.606	394.505	29.4745	88.0503	628.602	587.433	378.924	268.73	181.847	192.82	96.4517	499.714	1208.29	102.981	481.308	233.771	234.456	129.646	209.709	639.695	303.873	593.634	613.27	434.141
Notch signaling pathway	DLK1	0.0407075	0	0.9838	7.3892	0	0	0	0	0	1.0554	0.5435	0	0.7971	0	2.7874	0	0.3269	0.6334	0	0	0.671	0	0	1.5853	0	2.7473	0	1.2579	39.8435	11.2626	0.5605	0	0	2.8952	30.4194	0	1.54	0	0	0	1.3695	0.4116	0	8.8929	171.301	43.0733	15.0952	0.7725
Notch signaling pathway	DLL4	0.0145946	362.536	201.18	446.305	436.364	266.766	348.507	422.08	561.642	372.559	391.848	110.922	212.834	100.967	61.6314	155.824	116.378	290.103	134.008	604.373	422.712	327.985	248.789	146.481	233.734	290.11	244.546	257.862	101.032	171.903	195.067	135.487	172.192	122.177	233.339	90.5405	268.268	56.2432	265.02	171.107	260.477	258.057	283.495	160.665	149.95	227.025	836.544	362.299
Notch signaling pathway	DNER	0.0276002	230.367	101.328	536.946	189.411	120.715	12.3103	447.987	526.115	195.778	67.9348	21.3661	82.503	38.6918	4.9553	153.138	23.864	31.6706	91.7464	86.5329	76.4908	75.4866	74.4552	27.584	21.9644	60.4396	34.5404	73.5849	43.7567	28.4529	100.897	10.7672	66.9456	20.2664	17.4355	171.069	218.372	101.792	27.3698	26.2664	35.0589	109.89	84.7896	30.8287	10.427	82.2603	778.191	416.631
Notch signaling pathway	NEURL1B	0.0194412	524.956	466.306	620.197	511.089	651.267	865.538	328.816	840.363	464.38	1141.3	307.762	422.479	1190.23	200.689	365.381	1065.38	305.305	367.708	1459.86	819.592	801.157	858.959	348.446	525.487	803.846	437.972	433.333	697.972	1510.97	801.569	320.772	492.758	526.925	737.114	1070.38	878.109	487.573	584.78	1043.53	374.418	421.452	590.291	1229	650.447	984.533	1109.61	1365.77
Notch signaling pathway	NUMB	0.0379368	1062.01	861.781	1133	1715.48	1196.22	1402.52	1162.61	1357.11	934.037	1855.98	1497.44	1160.22	1815.94	1456.86	1278.45	1791.76	2572.92	1165.61	1455.79	1743.52	1748.03	1684.62	1802.47	1344.8	1302.2	1244.38	1157.86	1364.28	1279.79	2045.96	1428.44	1099.77	1209.03	1334	1447.34	1558.79	880.483	1399.87	1441.28	1186.52	1148.7	1298.38	1288.87	1313.31	1411.7	1586.57	1389.97
ERBB2 & ERBB4 signaling pathways	GRB7	0.044673	289.005	746.188	358.128	514.286	749.627	326.009	421.682	334.918	810.554	483.696	344.13	425.668	379.549	218.652	565.342	195.162	557.403	365.18	264.01	152.646	299.316	145.581	385.542	284.293	293.407	284.613	447.799	240.128	262.596	43.722	475.55	419.376	287.782	195.871	165.846	249.172	208.338	563.418	305.441	371.405	407.87	449.838	266.786	190.665	331.956	160.415	474.053
ERBB2 & ERBB4 signaling pathways	LRIG1	0.0161687	4304.11	7359.88	4894.51	6187.12	9802.16	6810.46	6232.91	4810.41	6241	5279.58	15374.3	9360.78	10360.1	10676.3	7971.13	10175.4	11714.7	4227.46	12082.7	4948.97	10516.4	13162.2	12634.1	6698.93	7828.26	9216.72	11182.3	8453.16	5707.52	8791.17	3736.77	9330.15	8219.84	8135.39	7563.55	9540.08	8226.01	5475.65	8458.92	5777.8	9357.93	6376.96	5456.87	7463.53	8771.46	15928.6	7042.48
ERBB2 & ERBB4 signaling pathways	NRG1	0.0196661	3.7231	0.9838	25.6158	4.3956	18.8773	3.8204	1.5943	21.9618	24.8021	3.2609	0	1.9928	72.2248	6.1941	0	16.6721	2.5337	19.5051	4.7508	29.8583	33.4035	6.0533	33.6081	14.5048	9.3407	6.9081	57.8616	48.7371	15.412	6.1659	111.261	4.506	0.579	12.9839	32.2115	44.352	7.5255	22.6969	11.257	5.478	62.9708	11.0032	47.4287	15.8888	60.2378	11.2651	45.8346
ERBB2 & ERBB4 signaling pathways	NRG2	0.0346474	11.6347	4.427	21.6749	15.1848	32.2901	5.0939	1.5943	16.1484	17.4142	2.1739	2.273	3.1885	0	8.9815	0.7676	24.5178	15.8353	22.3948	0.6787	4.6968	20.2525	18.7651	27.584	9.1173	10.4396	18.4215	22.0126	27.3924	52.7564	1.6816	17.9453	11.5867	6.9485	19.6613	42.6585	43.736	15.4471	12.016	17.2608	2.739	25.106	45.9547	32.6072	19.3644	36.2722	8.3361	47.6371
ERBB2 & ERBB4 signaling pathways	PIK3R1	0.0066474	753.927	1796.36	1561.08	1259.54	1098.86	974.208	1210.84	1488.24	737.203	767.391	1743.38	1297.33	971.718	970.308	1276.53	2751.88	1248.46	832.22	1106.26	3504.49	2359.55	2187.35	2023.78	830.916	1708.24	822.522	1260.38	2564.92	2307.05	1113.79	1039.93	1104.6	1085.12	1805.5	3032.24	3278.05	1638.18	1408.54	1502.44	1337.99	943.327	1105.5	1909.01	1411.12	2277.06	1709.36	1667.56
ERBB2 & ERBB4 signaling pathways	PTK6	0.0129393	81.9081	91.4904	56.1576	101.898	111.773	32.6858	73.7346	24.8686	225.857	83.1522	131.379	46.6321	307.324	24.157	293.993	139.915	70.9422	27.0905	526.663	654.198	837.98	60.8354	25.3646	47.2441	99.4505	364.747	238.365	40.1992	324.244	21.861	52.9385	71.1297	37.6375	32.6452	40.9173	33.88	189.722	92.7904	584.615	1336.35	78.199	210.356	42.6858	524.33	30.4428	332.545	41.9721
ERBB2 & ERBB4 signaling pathways	YAP1	0.0208825	1920.19	2283.33	3008.37	2352.45	2045.7	2788.91	2003.99	2683.87	2243.8	1941.3	2300.72	2370.67	1869.74	2462.78	2246.02	3673.1	2153.6	2325.09	735.699	3392.77	2037.35	2890.44	3528.22	2483.22	2695.6	2229.01	1989.94	3166.13	3529.93	2700.11	3133.69	1771.81	2036.48	2424.28	4624.96	3860.48	2297.26	2543.39	3201.5	3883.59	2512.66	2082.85	3550.04	2390.27	3463.35	2784.95	2756.26
MAPK6/MAPK4 signaling pathway	CDC42EP3	0.000655297	913.554	626.66	1465.02	670.13	1066.07	685.129	574.332	1181.09	687.071	1254.89	498.238	550.817	337.909	996.323	636.73	2020.92	666.35	724.58	1061.13	2114.23	2150.97	1393.16	1066.9	572.731	1537.91	819.759	872.956	1971.54	2457.62	1045.4	776.133	710.01	1023.16	1435.65	2872.48	1912.37	823.052	1399.2	1858.54	876.198	987.366	951.456	2653.64	1458.79	2041.93	1093.16	1875.36
MAPK6/MAPK4 signaling pathway	CDC42EP5	0.00187367	135.428	31.4806	214.778	822.777	108.793	26.743	99.6413	79.1272	322.955	71.7391	129.106	36.2694	4.7904	761.256	42.2184	604.773	881.077	821.022	52.5984	51.3294	182.798	884.383	167.406	271.446	310.44	604.227	912.579	650.302	1383.52	136.771	1152.09	143.869	1261.15	2642.41	780.041	226.688	773.146	398.531	240.901	33.9633	396.346	656.958	1697.95	692.155	289.854	122.339	244.88
MAPK6/MAPK4 signaling pathway	FOXO1	0.0239263	361.14	256.763	481.281	668.132	464.978	216.491	572.738	548.4	422.691	409.783	260.939	349.143	189.037	588.441	418.73	720.17	746.793	539.281	569.76	484.442	892.425	723.971	807.863	520.514	426.374	448.565	674.843	565.991	701.245	490.471	646.03	378.822	495.078	434.033	819.653	896.281	453.51	637.517	684.428	476.034	526.403	615.534	528.83	526.316	584.242	528.332	584.262
MAPK6/MAPK4 signaling pathway	PAK1	0.044777	761.838	105.755	433.005	662.138	1166.42	807.807	626.146	947.266	460.686	1270.65	942.38	1490.24	1883.74	416.554	303.972	1015.69	653.682	637.529	2059.82	791.412	1749.61	701.876	1025.36	370.493	1293.41	631.859	934.591	784.063	1361.59	803.812	1181.25	524.944	408.801	612.097	963.298	568.569	1215.57	1118.16	651.032	1339.63	460.14	871.197	658.073	515.392	736.132	620.255	715.071
MAPK6/MAPK4 signaling pathway	PAK3	0.00114315	2.7923	1.9675	3.4483	4.7952	2.4839	2.1225	2.3914	14.8565	2.6385	9.7826	0.4546	1.1957	0	8.0523	0	20.595	5.7007	2.8897	9.5016	8.3872	7.6276	17.5545	8.5606	4.5586	4.3956	1.3816	7.5472	26.3252	22.5252	2.2422	5.3836	2.8967	2.3162	3.7097	28.7292	26.18	5.5451	4.6729	28.5178	3.5607	4.1157	5.8252	25.4929	12.9096	40.1586	12.6169	16.9948
MAPK6/MAPK4 signaling pathway	RAG2	0.0268509	0	0	0	0	0	0	0	0	0	0	0	0	0	0	0	0	0	0	0	0	0	0	0	0	0.5495	0	0	0	0	0	0	0	0	0	0.4353	0	0	0	0	0.2739	0	0	0	0	0	0	0
Cell adhesion molecules	CD2	0.0363781	35.8348	54.5991	69.9507	71.5285	134.128	44.5716	51.8135	142.429	155.673	151.63	4.546	93.6628	109.074	102.203	48.743	133.704	65.2415	72.6025	27.8263	129.498	136.244	70.5206	486.684	16.9913	122.528	91.1867	63.522	79.6869	97.214	184.978	234.186	49.5655	16.7921	41.5484	92.7169	77.9241	97.4354	267.69	39.3996	347.85	84.7842	173.463	75.2931	151.936	106.226	78.6302	277.325
Cell adhesion molecules	CLDN11	0.031354	74.4619	81.1608	108.867	103.896	168.405	19.1021	35.4723	177.31	201.583	77.7174	8.1827	25.5082	6.6329	71.8517	81.7501	193.527	76.0095	77.2982	81.782	222.763	97.8432	180.69	159.797	38.1268	156.593	63.5543	113.837	137.318	223.474	302.691	489.009	96.5562	96.6995	63.8065	352.15	141.988	69.3138	212.951	240.15	43.0019	114.006	125.566	427.451	134.558	255.849	83.3615	252.348
Cell adhesion molecules	CLDN18	0.0330258	0.4654	0	0	0	0.9935	1.2735	0	0.6459	1.0554	0.5435	5.0006	0	1.474	0.3097	0	0.9807	0	0	1.6967	8.3872	2.3672	0.908	1.2682	0	0.5495	0.4605	1.2579	0	0.5928	0	0	0	0	0.7419	0.8706	1.232	0.3961	1.3351	0.3752	0.8217	0.8231	0	0	0.993	0.9716	0.9012	1.2875
Cell adhesion molecules	CLDN3	0.00483165	7779.87	7818.49	6377.34	9167.63	7047.69	4728.83	8858.51	6688.67	7791.03	7957.07	4323.67	5807.49	5444.13	4094.93	8448.28	3242.56	1973.08	5337.55	2977.07	2412.82	10313.5	2463.68	1358.59	5804.81	4687.36	13914.3	14288.1	4687.3	4889.15	2830.16	3179.9	7252.01	6788.07	7873.43	835.323	2809.58	3431.63	6676.23	8587.62	5260.48	7620.29	7399.35	5951.12	7242.8	2726.25	7224.29	4393.17
Cell adhesion molecules	CNTN1	0.0101216	221.989	122.479	299.015	270.529	160.457	94.2371	39.0594	430.84	55.409	226.63	19.0931	28.6967	0	225.156	113.99	733.573	126.049	64.2947	50.223	469.01	616.255	419.491	253.329	149.606	394.505	29.4745	88.0503	628.602	587.433	378.924	268.73	181.847	192.82	96.4517	499.714	1208.29	102.981	481.308	233.771	234.456	129.646	209.709	639.695	303.873	593.634	613.27	434.141
Cell adhesion molecules	CNTN2	0.000821455	5.5846	1.4757	3.9409	5.994	1.9871	4.2449	1.5943	6.1364	2.6385	8.1522	0.9092	0.3986	0	20.7503	2.3028	1.9614	4.4339	2.1672	17.9853	9.7291	16.5702	9.9879	5.0729	1.6577	5.4945	2.7632	2.5157	9.2494	20.1541	24.1031	2.6918	8.6901	2.3162	6.3065	1.3059	9.856	5.5451	5.3405	20.6379	4.6563	1.2347	3.8835	3.5572	3.9722	1.9432	9.4627	5.6649
Cell adhesion molecules	CNTNAP1	0.0174935	152.181	46.729	139.901	89.9101	142.573	60.7023	59.7848	264.511	212.665	136.413	16.3655	21.5225	44.2193	84.5496	58.3381	218.045	76.6429	158.57	438.772	1496.6	213.835	159.201	116.36	73.7671	91.2088	62.1727	61.6352	122.732	289.271	386.771	238.223	73.7045	63.6943	176.952	183.257	204.512	57.4314	166.889	466.041	346.754	169.157	116.505	348.601	155.412	253.582	171.229	547.698
Cell adhesion molecules	HLA-F	0.0433832	655.595	466.675	609.37	864.559	611.008	172.925	323.316	516.417	1047.72	550.446	72.3537	311.63	163.726	1156.74	243.527	657.47	536.589	639.556	287.082	429.204	617.449	360.708	3513.5	194.733	538.44	453.152	497.031	639.868	705.139	764.86	3365.88	808.091	269.421	356.619	463.502	677.407	779.146	1093.5	311.486	862.139	491.831	1288.74	454.296	962.78	614.326	459.387	1136.93
Cell adhesion molecules	ITGB8	0.000729716	122.862	67.3881	335.468	166.633	311.972	110.368	232.762	399.835	301.319	170.109	78.1907	53.0092	124.919	120.166	35.3099	530.892	100.079	265.125	132.344	446.867	735.139	523.002	912.175	135.516	405.495	184.215	494.969	413.732	368.109	1164.24	660.386	112.005	135.495	142.452	942.404	685.301	173.879	555.407	500.563	230.896	661.399	358.576	541.28	203.078	949.88	138.335	694.214
Cell adhesion molecules	JAM3	0.0196165	928.447	867.683	1981.77	737.662	846.001	248.327	362.694	892.038	1056.46	832.065	115.468	259.067	84.7536	1313.77	290.155	1173.26	996.358	2423.33	503.248	795.437	1385.06	1818.7	809.131	897.638	1713.19	397.906	1142.14	1714.69	2474.21	2399.66	784.657	558.738	2599.88	2964.03	2464.18	1440.21	666.601	1451.27	1075.42	688.852	846.196	2826.54	2527.36	2159.38	1117.31	1388.98	1278.99
Cell adhesion molecules	NEO1	0.00023188	3475.51	2809.64	2847.78	3425.37	2692.5	1765.88	3498.21	3082.09	2077.04	2407.61	1648.82	3571.94	745.094	6266.89	1531.76	7372.67	4855.11	3164.53	2467.71	3470.94	10263	6726.69	5531.07	5266.06	3581.32	2493.36	4484.91	6471.36	3898.64	3679.93	3596.23	4420.98	4629.42	5451.75	6537.63	5633.33	6367.36	4184.91	3344.84	1920.57	4118.21	1597.41	5338.1	3570.01	7886.95	3263.94	4408.62
Cell adhesion molecules	NLGN3	0.0202891	142.874	64.4368	82.7586	143.856	118.231	64.5227	29.4938	192.812	95.5145	127.717	14.0925	11.5584	5.1589	121.095	45.2888	242.89	82.3436	52.0137	74.9951	122.452	300.631	207.022	63.7286	98.6324	166.483	45.1328	69.8113	205.976	404.861	146.3	74.9215	187.641	152.866	156.548	128.846	197.428	65.7491	191.589	112.946	63.8181	66.675	152.751	205.722	118.173	263.945	160.189	169.948
Cell adhesion molecules	NRCAM	0.0475068	431.879	2122.48	495.074	1448.55	46.6965	322.613	854.922	1135.88	685.488	2191.85	45.0051	151.853	22.8466	511.943	260.219	89.8987	1874.9	128.589	323.395	273.421	614.413	122.579	551.68	431.828	608.791	21.1848	201.258	190.324	283.936	165.359	20.6371	127.132	82.8025	410.662	69.6465	76.0761	143.777	386.515	251.782	261.298	155.575	31.068	37.943	391.758	1818.15	222.598	286.852
Cell adhesion molecules	NTNG1	0.00971072	188.482	0.4919	104.926	139.46	48.1868	72.1635	35.4723	84.9406	72.2955	10.8696	0.9092	78.5173	2.5795	105.61	50.6621	196.469	6.3341	208.055	8.1443	11.4065	43.9243	467.615	318.96	89.9295	182.418	484.487	231.446	90.715	308.832	453.475	410.498	9.0119	102.49	290.468	145.822	72.6881	199.624	335.781	961.726	1431.66	402.931	27.8317	61.6573	45.6802	83.5557	5.1819	152.696
Cell adhesion molecules	PDCD1LG2	0.00534334	27.9232	8.362	19.2118	15.5844	10.4322	11.8858	7.9713	17.4403	7.3879	8.6957	1.3638	11.1598	7.7384	21.06	7.6761	35.9595	19.6358	5.0569	21.0394	38.2454	26.828	17.2518	50.4122	8.7029	29.6703	9.6713	13.2075	18.143	26.0818	24.6637	34.096	12.5523	11.0017	16.6936	19.5881	39.116	10.298	36.7156	13.5084	73.4045	6.1736	22.0065	10.0786	22.3436	24.9372	33.5699	29.6122
CD28 co-stimulation	LCK	0.0181909	38.1617	30.9887	78.8177	90.3097	106.309	34.3838	51.0163	88.1703	125.594	105.435	19.0931	82.9016	105.021	121.714	62.1762	117.359	67.1417	81.9939	61.7607	91.2522	120.726	62.3487	394.103	54.7037	92.8571	66.7781	47.1698	64.3899	75.2816	132.847	142.216	77.2449	21.4244	46.371	63.5525	85.9321	119.22	174.232	70.9193	291.153	61.7361	117.799	37.943	175.77	99.101	64.2109	208.316
CD28 co-stimulation	PAK1	0.044777	761.838	105.755	433.005	662.138	1166.42	807.807	626.146	947.266	460.686	1270.65	942.38	1490.24	1883.74	416.554	303.972	1015.69	653.682	637.529	2059.82	791.412	1749.61	701.876	1025.36	370.493	1293.41	631.859	934.591	784.063	1361.59	803.812	1181.25	524.944	408.801	612.097	963.298	568.569	1215.57	1118.16	651.032	1339.63	460.14	871.197	658.073	515.392	736.132	620.255	715.071
CD28 co-stimulation	PAK3	0.00114315	2.7923	1.9675	3.4483	4.7952	2.4839	2.1225	2.3914	14.8565	2.6385	9.7826	0.4546	1.1957	0	8.0523	0	20.595	5.7007	2.8897	9.5016	8.3872	7.6276	17.5545	8.5606	4.5586	4.3956	1.3816	7.5472	26.3252	22.5252	2.2422	5.3836	2.8967	2.3162	3.7097	28.7292	26.18	5.5451	4.6729	28.5178	3.5607	4.1157	5.8252	25.4929	12.9096	40.1586	12.6169	16.9948
CD28 co-stimulation	PIK3R1	0.0066474	753.927	1796.36	1561.08	1259.54	1098.86	974.208	1210.84	1488.24	737.203	767.391	1743.38	1297.33	971.718	970.308	1276.53	2751.88	1248.46	832.22	1106.26	3504.49	2359.55	2187.35	2023.78	830.916	1708.24	822.522	1260.38	2564.92	2307.05	1113.79	1039.93	1104.6	1085.12	1805.5	3032.24	3278.05	1638.18	1408.54	1502.44	1337.99	943.327	1105.5	1909.01	1411.12	2277.06	1709.36	1667.56
CD28 co-stimulation	PRR5	0.0292062	887.958	635.922	498.03	460.208	814.208	515.333	581.905	486.39	604.222	1010.87	575.52	545.636	513.669	464.249	394.55	275.871	480.374	1117.93	258.676	163.046	260.389	306.598	321.034	412.35	569.214	561.857	507.547	380.975	433.906	388.453	644.684	868.964	595.252	505.259	235.492	296.296	400.436	559.413	387.993	171.734	541.969	464.078	551.27	415.591	287.911	368.478	339.125
IL2 signaling	IL2	0.000939426	0	0	0	0	0.4968	0	0	0.323	0	0.5435	0	0	0	0.3097	0	1.3076	0	0	0	1.0065	0.7891	1.2107	3.1706	0	0	0.9211	0.6289	0.3557	0	2.2422	0	0	1.1581	0	0.4353	0	0	0	0	1.0956	0.4116	0.6472	0	1.4896	0	0	0.515
IL2 signaling	IL2RB	0.0394269	60.0349	55.5829	91.133	152.248	147.044	42.4491	65.7633	188.936	180.475	210.87	5.4552	110.004	116.076	107.158	60.2571	223.929	91.8448	124.616	100.446	163.717	188.848	117.433	458.783	36.8835	179.121	81.0548	76.7296	123.799	125.074	128.924	304.172	79.8198	20.8454	23	137.552	178.948	137.835	164.219	60.0375	305.67	44.8616	124.272	97.2288	209.037	221.844	97.5555	541.775
IL2 signaling	LCK	0.0181909	38.1617	30.9887	78.8177	90.3097	106.309	34.3838	51.0163	88.1703	125.594	105.435	19.0931	82.9016	105.021	121.714	62.1762	117.359	67.1417	81.9939	61.7607	91.2522	120.726	62.3487	394.103	54.7037	92.8571	66.7781	47.1698	64.3899	75.2816	132.847	142.216	77.2449	21.4244	46.371	63.5525	85.9321	119.22	174.232	70.9193	291.153	61.7361	117.799	37.943	175.77	99.101	64.2109	208.316
Cell recruitment (pro-inflammatory response)	HSP90AB1	0.0218811	38315.8	42866.2	29756.7	43443	37234.5	35151.7	33821	35534.9	38545.1	29577.7	39084.4	26337.2	35175.7	40065.1	33637.7	34592	27621.9	30855.3	43029.2	44729.7	41279.1	37752.4	28271.1	28987.6	37813.7	28998.7	26383	29364.6	36149.4	34610.4	26978	36986.8	31406.5	37139.8	30604.4	31250.6	39474.4	33319.1	34509.9	55577.7	29908.7	20492.6	32508.8	30099.8	28614.9	40015.5	37365.7
Cell recruitment (pro-inflammatory response)	IL1A	0.0121838	0	0	0	0.3996	0.4968	0.849	0	0.6459	0	0	0	0.7971	1.8425	0	0	0	0	0.3612	2.3754	0.671	0.263	0.6053	0.9512	1.2433	0.5495	0.4605	0	0	0	0.5605	0	0	0.579	0.7419	0	0.308	0	0.6676	0.3752	0	1.2347	0	1.1857	0	1.9432	1.1265	6.4374
Cell recruitment (pro-inflammatory response)	NT5E	0.0436732	177.312	61.9774	360.591	177.023	200.696	60.2778	235.153	271.939	151.451	215.761	29.0942	27.501	22.1096	164.454	94.7995	297.81	107.047	153.151	266.385	168.75	282.483	262.712	155.358	117.696	157.692	68.1597	101.887	307.008	387.078	296.525	152.086	96.5562	167.342	262.645	334.739	368.676	109.318	283.712	230.019	167.625	174.096	235.599	483.18	292.453	341.672	461.642	290.715
Cell recruitment (pro-inflammatory response)	P2RX4	0.0350317	826.062	553.369	692.118	636.164	833.582	725.456	755.68	463.136	736.676	1175	595.977	386.608	365.177	974.334	743.044	695.325	964.687	959.726	960.006	861.193	622.304	756.356	745.403	774.554	1230.22	1075.36	757.233	830.665	933.61	901.906	706.146	850.338	972.206	1025.36	642.924	698.853	1147.04	827.103	429.644	645.029	835.907	862.783	783.166	845.084	669.741	795.539	706.831
Cytokine-cytokine receptor interaction	ACVR1B	0.00644007	1109.02	678.308	617.241	1553.25	1294.09	1160.56	1104.42	901.081	879.683	2487.5	1181.5	1504.18	1261.35	1278.77	937.248	1759.07	2032.62	1328.16	1192.12	1245.66	1873.75	1225.79	1090.68	1419.39	1252.2	2048.02	1450.94	1224.48	1493.18	2033.07	1343.2	1519.47	1012.74	961.178	1305.87	1109.11	1169.62	1276.37	1354.22	1757.05	1328.97	1770.87	1050.55	1099.8	1438.91	1127.41	1527.48
Cytokine-cytokine receptor interaction	BMP8B	0.0201776	41.4194	22.1348	89.1626	75.9241	59.6125	92.1146	43.4436	29.0671	22.6913	21.7391	90.9194	101.634	107.6	23.2279	41.067	168.683	67.7751	22.3948	299.302	141.575	100.473	253.329	52.6316	20.3067	53.2967	76.91	68.5535	132.337	88.3699	165.359	74.4729	49.2436	48.0602	47.4839	74.87	60.9841	34.0628	128.171	108.067	193.372	48.9773	69.9029	31.4215	50.149	93.5954	94.4013	77.5068
Cytokine-cytokine receptor interaction	BMPR1A	0.00611963	896.335	591.736	765.517	700.1	587.183	675.366	597.449	917.876	471.24	891.848	1383.79	836.987	1111.75	799.66	489.733	1062.44	521.298	934.441	3133.85	1280.55	1368.49	918.886	780.913	1116.04	1006.04	1043.58	691.824	1024.9	664.493	1058.86	493.495	926.295	970.469	709.291	1759.88	1200.59	748.589	697.597	755.722	930.43	612.833	475.081	787.316	606.753	1005.58	983.44	676.189
Cytokine-cytokine receptor interaction	CCL28	0.000730447	10.2385	1.4757	14.7783	20.7792	38.2514	2.9714	18.334	23.5767	8.4433	48.913	20.0023	30.291	1.474	11.4591	6.5247	54.593	70.9422	28.1741	58.0279	60.3875	45.5024	25.7264	36.7787	6.2163	30.2198	13.8162	24.5283	30.5941	27.8601	14.0135	23.7775	16.4145	23.7406	20.4032	36.5644	17.864	13.0706	26.7023	21.0131	47.6582	39.0995	37.5405	45.6501	17.3784	40.1586	36.7241	30.6422
Cytokine-cytokine receptor interaction	CTF1	0.0185457	75.8581	24.1023	138.916	57.9421	133.631	14.4327	53.4077	75.2516	90.2375	59.7826	6.819	15.1455	73.3303	37.7841	28.0177	113.763	44.3389	85.9671	66.5115	49.9874	145.976	61.4407	85.9226	54.2893	77.4725	60.7911	74.8428	93.561	282.158	94.7309	104.98	77.2449	97.2785	171.387	207.198	106.876	54.2628	172.897	162.852	121.611	104.951	84.7896	213.429	121.648	125.334	66.0133	153.984
Cytokine-cytokine receptor interaction	CXCL10	0.028362	53.5195	218.888	142.857	234.166	312.469	21.6491	115.185	248.685	82.3219	467.935	17.7293	311.678	689.452	130.696	127.423	86.9565	239.43	62.8499	133.702	241.214	197.265	155.872	1991.44	47.2441	169.231	127.109	198.113	89.6478	160.047	530.83	984.746	208.561	104.227	76.7904	272.492	197.12	271.71	306.409	210.131	2759.79	78.199	194.175	13.0429	216.981	107.521	163.794	337.579
Cytokine-cytokine receptor interaction	CXCL13	0.00395479	16.2885	4.9188	4.9261	13.986	8.4451	5.9429	3.5871	28.4212	78.628	4.8913	0.4546	53.4077	41.6398	290.814	1362.89	32.3635	79.1766	50.9301	38.3459	30.1937	12.6249	329.601	304.375	1.6577	97.8022	1.8422	13.2075	258.627	1632.48	57.7354	111.709	85.6131	123.914	15.9516	8.2705	166.936	25.349	14.6862	5.6285	939.742	9.4662	18.7702	142.879	90.864	8.7442	2.0277	67.4644
Cytokine-cytokine receptor interaction	CXCL17	0.0474154	12.1001	2.4594	34.9754	87.9121	77.993	0.849	29.8924	114.331	136.675	0	2.273	19.5297	1.1055	2.1679	69.8522	174.894	4.4339	153.874	25.7902	77.4973	91.2678	2.724	147.749	26.523	3.2967	37.3036	216.981	4.2689	63.4262	16.2556	753.253	12.8742	1.7371	4.8226	16.1058	38.808	6.3373	75.4339	152.345	22.4596	349.015	176.052	100.193	1.9861	112.379	30.1904	155.271
Cytokine-cytokine receptor interaction	CXCL3	0.0355189	6.5154	0.9838	8.3744	35.5644	12.4193	0	21.9211	15.8254	12.6649	2.1739	0.4546	1.1957	11.0548	5.265	0.7676	131.416	3.1671	43.3448	3.3934	6.7097	14.7291	1.816	90.6785	25.6942	1.0989	15.6583	91.8239	9.9609	1.1855	10.6502	6.7295	2.253	3.4742	0	0.8706	18.172	1.5843	6.008	2.6266	1.9173	42.3921	16.8285	15.4143	3.4757	30.1189	2.4783	108.921
Cytokine-cytokine receptor interaction	CXCL6	0.0156034	53.9849	0.4919	14.7783	15.984	21.8579	4.2449	25.9067	40.371	45.3826	4.8913	2.273	4.7828	7.3699	5.8844	7.6761	90.2256	4.4339	64.656	10.5197	24.155	78.1168	4.54	310.399	16.1625	15.9341	51.5803	46.5409	25.9694	28.4529	28.5874	119.336	14.4834	6.9485	5.1936	18.2822	65.6041	7.5255	37.3832	42.7767	10.4081	232.951	50.4854	50.393	11.4201	135.373	11.4904	58.967
Cytokine-cytokine receptor interaction	EDA2R	0.0117573	65.6195	11.8052	85.2217	18.3816	88.922	50.5145	41.4508	42.3088	20.0528	82.6087	42.2775	21.5225	204.514	117.378	67.9332	49.3625	19.6358	29.9801	19.682	71.123	50.2367	258.777	152.188	29.8384	39.5604	122.043	51.5723	79.3312	98.9923	180.493	77.1646	72.4171	72.3798	54.1613	75.3053	62.8321	71.6903	48.0641	39.7749	20.8162	58.8551	96.4401	108.493	64.5482	99.101	46.8627	53.5595
Cytokine-cytokine receptor interaction	GDF10	0.00232966	3.7231	0.9838	30.0493	6.7932	1.9871	0.4245	4.3842	2.2608	2.6385	8.6957	0	0.7971	0	32.2094	0.7676	9.1533	7.601	3.9733	10.859	5.3678	27.617	16.9492	0.9512	4.1442	15.9341	17.5005	16.9811	88.2248	143.45	19.0583	2.6918	7.0808	68.3266	81.9839	18.2822	41.272	9.5059	16.0214	21.3884	4.3824	14.8167	7.767	86.5574	191.162	6.1533	12.3916	4.3775
Cytokine-cytokine receptor interaction	GHR	0.000503823	281.559	310.379	252.217	203.397	217.586	408.361	348.745	391.76	231.135	124.457	983.294	432.842	679.871	398.281	229.898	360.248	58.9074	206.971	2286.5	485.784	685.955	782.99	578.63	977.207	347.253	216.914	627.673	782.995	304.09	275.224	296.994	634.052	246.091	425.5	731.288	542.081	2455.69	290.387	960.225	238.839	256.411	1015.53	371.722	579.444	951.823	836.319	276.81
Cytokine-cytokine receptor interaction	IFNA1	0.0204249	0	0	0	0	0	0	0	0	0	0	0	0	0	0	0	0.3269	0	0	0	0	0	0	0	0	0	0	0	0	0	0	0.4486	0	0	0	0	0.308	0	0.6676	0	0	0	0	0	0	0	0	0
Cytokine-cytokine receptor interaction	IFNA21	0.00153704	0	0	0	0	0	0	0	0	0	0	0.4546	0	0.737	0	0	0	0	0	0.3393	0	0.263	0	0	0	0	0.9211	0	0	1.1855	0	0	0	0	0	0	0	0	0.6676	0	0	0	0	0	0.993	0	0	0
Cytokine-cytokine receptor interaction	IFNG	0.0326011	0.4654	1.4757	1.4778	1.1988	1.4903	1.698	1.1957	1.9378	0.5277	1.6304	0.9092	9.9641	2.211	1.2388	1.5352	0.9807	1.2668	0.7224	0	1.6774	3.1562	0	10.1458	0	2.7473	1.8422	9.434	0	1.7783	0	4.9349	0.3219	0.579	0.7419	1.3059	0.616	0	1.3351	0	4.1085	0.4116	0.6472	0.5929	0.4965	0	2.0277	3.605
Cytokine-cytokine receptor interaction	IL12B	0.0226546	0.4654	1.9675	1.9704	1.998	0.4968	0	0.7971	0.323	2.1108	2.7174	0.9092	2.79	0	1.5485	1.919	1.6345	0.6334	0	0.3393	1.6774	2.1042	0.6053	21.5599	0	3.2967	0.9211	2.5157	0	1.1855	5.6054	8.524	0.6437	0	0.371	0	0.308	2.3765	0.6676	0.7505	14.2427	0.8231	3.2362	0	1.9861	2.267	2.0277	1.8025
Cytokine-cytokine receptor interaction	IL17RE	0.00791793	40.4887	167.24	209.36	65.1349	256.831	7.2164	70.546	56.5194	146.702	874.457	26.8212	18.7326	273.422	478.185	66.7818	84.6682	62.0744	186.744	140.149	395.202	649.658	62.954	60.241	54.2893	308.791	122.503	164.151	215.937	451.689	68.3857	217.586	76.2794	437.174	91.2581	270.316	84.3921	114.863	118.157	156.098	79.4303	107.009	356.634	179.636	139.523	291.473	153.881	141.109
Cytokine-cytokine receptor interaction	IL19	0.0126697	0	0	0	0	0	0	0	0	0	0	0	0	0.3685	0	0	0.3269	0	0	0	0	0	0	0.3171	0	0	0	0	0	0	0	0.4486	0	0	0	0	0.308	0	0	0	0	0	0	0	0	0.3239	0	0
Cytokine-cytokine receptor interaction	IL1A	0.0121838	0	0	0	0.3996	0.4968	0.849	0	0.6459	0	0	0	0.7971	1.8425	0	0	0	0	0.3612	2.3754	0.671	0.263	0.6053	0.9512	1.2433	0.5495	0.4605	0	0	0	0.5605	0	0	0.579	0.7419	0	0.308	0	0.6676	0.3752	0	1.2347	0	1.1857	0	1.9432	1.1265	6.4374
Cytokine-cytokine receptor interaction	IL1RL2	0.00029196	1.8615	0.9838	4.4335	9.5904	10.4322	0	5.9785	2.5837	20.5805	10.8696	0	0	0.737	51.7208	21.8768	16.999	1.2668	30.7025	0.6787	9.0581	3.1562	3.3293	9.5117	3.7298	4.3956	15.1978	7.5472	29.1711	11.2626	10.6502	42.1714	7.7245	43.4279	15.5807	14.7999	14.476	9.1098	6.6756	13.8837	10.9559	15.2282	73.7864	21.9358	50.149	49.2266	57.0012	7.4674
Cytokine-cytokine receptor interaction	IL2	0.000939426	0	0	0	0	0.4968	0	0	0.323	0	0.5435	0	0	0	0.3097	0	1.3076	0	0	0	1.0065	0.7891	1.2107	3.1706	0	0	0.9211	0.6289	0.3557	0	2.2422	0	0	1.1581	0	0.4353	0	0	0	0	1.0956	0.4116	0.6472	0	1.4896	0	0	0.515
Cytokine-cytokine receptor interaction	IL20RB	0.0478793	1.3962	7.3783	11.33	6.7932	17.387	2.9714	0	3.2297	15.3034	10.8696	9.0919	7.1742	10.3178	3.4068	24.1796	4.9036	8.8678	9.7526	4.7508	2.6839	31.0363	2.724	12.3653	4.1442	6.5934	7.3686	52.2013	3.5575	4.7421	13.4529	98.699	5.1497	4.6323	3.7097	3.4823	4.62	6.3373	29.3725	7.8799	11.5037	32.5143	20.0647	8.3	4.4687	7.1249	10.3639	7.7249
Cytokine-cytokine receptor interaction	IL22RA1	0.0453494	4.6539	8.8539	5.4187	3.1968	16.3934	2.1225	4.3842	2.2608	9.4987	8.6957	3.6368	3.9857	5.1589	3.4068	1.919	7.1919	7.601	10.1138	15.2705	13.084	7.1015	9.3826	17.1211	2.901	7.6923	5.987	13.8365	7.4707	26.0818	5.0448	13.459	5.1497	7.5275	4.4516	11.3176	8.624	6.3373	9.3458	9.0056	8.4908	10.2893	7.767	8.8929	5.9583	9.7158	4.0554	18.2823
Cytokine-cytokine receptor interaction	IL25	0.00501212	0	0	0	0	0	0	0	0.323	0.5277	0	0	0	0	0	0.3838	0.6538	0	0	0	0	0	0	0.6341	0.4144	0	1.3816	0	0.3557	0	0.5605	0.4486	0	2.3162	0	0.8706	0.308	1.1882	0.6676	0	0.2739	0	1.2945	0.5929	0	0	0	0
Cytokine-cytokine receptor interaction	IL2RB	0.0394269	60.0349	55.5829	91.133	152.248	147.044	42.4491	65.7633	188.936	180.475	210.87	5.4552	110.004	116.076	107.158	60.2571	223.929	91.8448	124.616	100.446	163.717	188.848	117.433	458.783	36.8835	179.121	81.0548	76.7296	123.799	125.074	128.924	304.172	79.8198	20.8454	23	137.552	178.948	137.835	164.219	60.0375	305.67	44.8616	124.272	97.2288	209.037	221.844	97.5555	541.775
Cytokine-cytokine receptor interaction	TGFB3	0.0263427	658.988	937.039	1003.94	1297.1	825.137	286.107	592.268	747.348	961.478	407.609	232.299	427.66	467.619	668.654	249.089	837.856	733.492	2000	2470.77	2042.1	640.715	1313.86	649.017	2182.76	874.725	478.5	952.83	797.581	1663.9	489.35	1969.49	550.37	534.453	758.259	1292.38	1437.13	983.86	548.064	2677.3	777.869	1145	812.298	1007.86	607.746	3166.7	729.075	866.995
Interferon Signaling	CAMK2G	0.0124339	789.296	704.378	1254.19	823.576	838.549	743.284	652.053	927.242	693.931	667.391	528.242	783.579	591.064	869.344	607.561	1318.08	715.123	841.611	1715.05	1096.37	888.743	993.947	801.205	782.843	965.385	774.166	777.987	1123.8	1432.13	1057.74	585.464	922.433	1055.59	1160.76	1396.85	1260.34	1004.46	1042.72	1443.15	613.257	842.08	882.201	1777.39	1282.03	1350.82	847.584	1165.69
Interferon Signaling	CXCL10	0.028362	53.5195	218.888	142.857	234.166	312.469	21.6491	115.185	248.685	82.3219	467.935	17.7293	311.678	689.452	130.696	127.423	86.9565	239.43	62.8499	133.702	241.214	197.265	155.872	1991.44	47.2441	169.231	127.109	198.113	89.6478	160.047	530.83	984.746	208.561	104.227	76.7904	272.492	197.12	271.71	306.409	210.131	2759.79	78.199	194.175	13.0429	216.981	107.521	163.794	337.579
Interferon Signaling	DDX58	0.00980184	333.217	371.372	263.547	400	404.868	227.527	312.077	337.179	182.058	346.739	126.378	153.846	213.358	1023.58	250.624	444.263	319.873	282.102	902.996	1634.49	380.852	380.448	857.007	262.329	303.297	206.782	209.434	421.202	360.996	276.906	1112.16	309.945	356.688	385.807	383.491	585.817	492.722	360.481	317.073	1138.87	297.979	307.443	278.051	268.123	365.637	287.259	441.608
Interferon Signaling	EIF4A1	0.0356736	12883.2	16800.5	11118.1	12886.1	12567.9	10827.7	13242	10160.1	17405.7	7583.34	13524.8	8980.09	10355.8	15280.4	8772.35	6625.7	5893.4	17112	8381.95	7977.22	11192.9	14323.7	10722.1	12354.1	10346.7	11663.9	11054.1	9949.43	9104.39	8937.7	17038.7	14340.2	12026.2	12430	7441.67	9692.51	15469.9	9788.66	6291.34	7373.43	16313.3	8612.27	11887	9877.01	9859.17	13548	11364.7
Interferon Signaling	GBP1	0.00343807	279.697	187.408	440.887	282.118	471.436	104.849	181.347	348.483	394.723	411.957	40.0045	259.865	246.522	228.253	121.666	379.209	203.325	196.857	272.494	458.945	448.974	576.574	1715.28	247.41	264.835	128.03	555.346	247.599	535.862	364.91	1407.81	175.089	160.973	201.065	501.455	550.397	170.71	578.772	257.411	1154.2	470.429	496.44	347.415	279.543	539.226	317.224	634.732
Interferon Signaling	GBP4	0.0165049	495.637	206.099	353.695	465.534	555.39	296.719	279.793	481.546	201.583	538.043	162.746	609.805	160.295	295.769	256.764	603.138	433.888	136.536	805.265	892.057	1225.41	478.208	1421.05	89.5151	486.813	215.072	215.723	305.585	343.806	651.345	801.256	303.83	154.024	125.387	746.959	600.601	292.702	589.453	307.692	4309.23	174.507	655.663	325.479	414.101	557.686	822.125	837.64
Interferon Signaling	GBP5	0.0119139	38.6271	39.3507	76.3547	95.1049	103.825	44.9961	29.4938	90.4311	62.2691	161.413	5.4552	108.011	103.915	65.0382	24.9472	140.896	110.214	15.8931	58.3673	162.711	95.4761	52.9661	612.238	10.3605	85.7143	33.1588	25.7862	64.7456	52.1636	120.516	272.768	53.1059	16.2131	10.7581	77.917	102.872	68.1256	154.206	35.6473	274.719	20.1671	170.226	27.2715	106.256	95.8624	96.429	195.956
Interferon Signaling	HLA-F	0.0433832	655.595	466.675	609.37	864.559	611.008	172.925	323.316	516.417	1047.72	550.446	72.3537	311.63	163.726	1156.74	243.527	657.47	536.589	639.556	287.082	429.204	617.449	360.708	3513.5	194.733	538.44	453.152	497.031	639.868	705.139	764.86	3365.88	808.091	269.421	356.619	463.502	677.407	779.146	1093.5	311.486	862.139	491.831	1288.74	454.296	962.78	614.326	459.387	1136.93
Interferon Signaling	IFIT2	0.0464843	101.92	189.867	102.956	157.443	261.301	67.4941	70.9446	100.443	84.4327	200.543	28.185	55.7991	62.6439	397.662	114.757	199.738	136.184	93.9137	2380.84	299.253	86.0074	211.562	350.349	23.622	165.385	56.6463	25.1572	159.374	187.907	290.919	256.617	223.367	140.706	93.8549	189.351	372.064	129.122	241.655	87.4296	411.394	58.0319	139.159	127.465	139.027	230.588	182.269	270.63
Interferon Signaling	IFIT5	0.0384481	333.682	346.778	268.473	347.652	308.992	114.613	172.977	328.459	214.776	328.804	85.9189	175.767	212.989	514.111	201.113	394.9	231.196	437.421	1232.5	361.989	334.298	362.288	433.418	229.175	317.033	175.005	210.063	383.493	348.548	390.135	623.149	214.677	345.107	308.645	636.83	417.956	365.581	290.387	162.476	474.664	193.851	255.663	256.115	249.255	418.102	188.577	347.107
Interferon Signaling	IFNA1	0.0204249	0	0	0	0	0	0	0	0	0	0	0	0	0	0	0	0.3269	0	0	0	0	0	0	0	0	0	0	0	0	0	0	0.4486	0	0	0	0	0.308	0	0.6676	0	0	0	0	0	0	0	0	0
Interferon Signaling	IFNA21	0.00153704	0	0	0	0	0	0	0	0	0	0	0.4546	0	0.737	0	0	0	0	0	0.3393	0	0.263	0	0	0	0	0.9211	0	0	1.1855	0	0	0	0	0	0	0	0	0.6676	0	0	0	0	0	0.993	0	0	0
Interferon Signaling	IFNG	0.0326011	0.4654	1.4757	1.4778	1.1988	1.4903	1.698	1.1957	1.9378	0.5277	1.6304	0.9092	9.9641	2.211	1.2388	1.5352	0.9807	1.2668	0.7224	0	1.6774	3.1562	0	10.1458	0	2.7473	1.8422	9.434	0	1.7783	0	4.9349	0.3219	0.579	0.7419	1.3059	0.616	0	1.3351	0	4.1085	0.4116	0.6472	0.5929	0.4965	0	2.0277	3.605
Interferon Signaling	MID1	0.00763453	329.029	58.5342	321.182	692.108	297.566	359.12	185.731	357.849	165.172	669.565	213.661	565.564	23.5836	192.018	77.9121	379.536	511.164	260.069	403.82	2293.72	941.084	271.489	330.374	472.026	479.67	792.587	270.44	353.255	684.647	548.767	842.979	256.196	188.188	298.629	676.442	506.045	274.483	550.734	496.06	715.694	370.005	334.945	846.602	239.325	501.982	704.968	573.962
Interferon Signaling	NOS2	0.0388415	1.3962	3.4432	0.9901	5.5944	16.3934	0.849	4.3842	6.1364	15.3034	3.8043	1.3638	4.7828	28.7425	1.2388	5.0163	22.2883	3.1671	2.5284	17.3066	8.4173	12.888	4.8426	290.425	3.7298	12.1264	7.8292	0.6289	4.6247	10.6698	4.4843	97.8421	31.5417	10.4227	6.3065	1.789	5.236	3.9964	8.6782	3.0019	1.3695	8.6431	12.945	1.1857	7.4479	7.1249	12.1663	50.9845
Interferon Signaling	PSMB9	0.0471599	228.04	430.398	230.049	400.799	348.236	85.3228	194.898	207.023	392.084	262.5	40.4591	237.146	335.698	313.112	102.859	201.046	268.567	182.048	287.764	202.969	293.267	177.058	1523.78	104.434	258.791	283.692	199.371	247.599	328.986	447.87	1262	329.9	166.184	196.242	297.739	206.36	246.757	443.925	210.131	1341.55	228.835	627.184	234.179	417.577	211.804	285.006	628.552
Interferon Signaling	TRIM14	0.00269398	871.204	819.71	429.064	1067.5	1410.83	983.122	656.038	703.841	906.596	1201.63	740.084	596.461	1800.09	2024.24	783.727	1513.89	1485.35	539.642	2061.31	1321.14	1599.8	1127.72	1490.65	1426.85	1559.34	1837.55	1126.42	1294.53	601.66	1436.66	1346.34	1030.11	878.981	1210.47	1088.66	1211.11	1667.89	1022.03	1207.88	1938.65	1248.11	1603.78	859.052	895.73	1549.51	1094.74	1060.89
Interferon Signaling	TRIM22	0.0122755	330.425	401.377	427.094	332.867	757.079	164.278	148.665	643.03	558.839	377.717	67.735	200.478	77.0152	961.017	220.687	531.546	305.305	339.173	416.715	676.004	564.703	684.927	1925.81	272.685	473.077	355.536	479.245	454.287	482.513	644.619	1744.73	372.385	388.535	209.226	761.759	753.985	487.573	739.653	278.799	896.193	532.984	902.265	601.752	428.5	883.164	492.509	779.703
Interferon Signaling	TRIM34	0.0134445	32.1117	125.43	38.4236	82.7173	54.6448	21.6491	33.0809	63.9477	93.4037	73.913	4.2687	17.9354	6.2644	187.682	105.162	109.186	55.1069	62.4887	56.3312	100.646	130.984	58.1114	121.116	68.794	57.6923	89.8051	61.6352	94.6282	120.925	49.8879	136.833	101.384	71.2218	106.097	163.669	93.6321	126.745	79.4393	64.5403	94.4947	83.1379	87.3786	87.7431	96.8222	150.905	126.608	114.844
Interferon Signaling	TRIM38	0.0323793	470.971	396.458	415.764	238.561	401.391	230.499	139.498	196.042	416.887	414.13	109.558	52.6106	347.49	533.623	483.976	426.937	454.157	514.719	317.287	223.769	666.491	237.893	772.353	615.002	455.495	267.573	341.509	389.185	477.771	129.484	790.04	450.595	331.789	286.016	484.479	295.68	472.522	453.939	335.46	626.13	456.847	483.495	374.687	441.41	421.017	398.333	312.345
Interferon Signaling	TRIM48	0.0317938	0	0	0	0	0	0	0	0	0	1.6304	0	0	0.3685	0	0	0	0	0	6.4475	0	0	1.816	0	1.2433	0	0	0	0.3557	0	0	0	0	1.1581	0	0	0	0	0	0	0.2739	0	0.6472	0	0	0	0	0
IL12 signaling	CD3G	0.044927	1.3962	3.9351	6.8966	11.1888	11.4257	4.2449	5.1813	30.359	9.4987	11.9565	0.9092	15.9426	10.3178	18.892	4.6056	20.595	3.8005	7.5853	3.3934	29.5228	27.354	12.7119	70.0698	0	12.0879	9.6713	6.9182	14.2298	5.3349	11.7713	32.3015	2.5748	0.579	4.0806	10.8823	18.172	10.6941	25.3672	4.5028	72.8568	5.762	10.356	4.15	16.8818	24.2895	13.2928	46.8646
IL12 signaling	ETV5	0.00764031	142.408	79.6852	215.763	153.047	75.5092	94.6616	249.502	203.793	140.897	152.174	21.8207	47.4293	22.4781	70.9226	76.3769	182.413	157.72	129.673	129.29	244.234	153.866	264.83	274.572	926.233	239.56	120.661	106.289	307.364	434.499	234.865	172.275	127.132	101.911	109.806	245.939	352.352	642.836	185.581	301.689	102.438	81.0801	190.939	301.172	219.96	302.161	204.348	217.328
IL12 signaling	HLX	0.0105341	284.817	126.906	187.685	273.726	152.012	192.719	148.665	180.216	155.673	288.587	61.3706	91.2714	89.544	61.012	114.373	74.8611	283.135	116.308	255.866	45.2906	93.8979	60.5327	78.6303	99.0468	413.187	120.661	58.4906	66.5244	40.3082	123.318	81.2023	101.384	45.165	68.2581	33.5174	134.596	49.9059	166.222	60.4128	76.9652	57.2088	141.748	93.0788	96.8222	125.657	184.522	143.426
IL12 signaling	IFNG	0.0326011	0.4654	1.4757	1.4778	1.1988	1.4903	1.698	1.1957	1.9378	0.5277	1.6304	0.9092	9.9641	2.211	1.2388	1.5352	0.9807	1.2668	0.7224	0	1.6774	3.1562	0	10.1458	0	2.7473	1.8422	9.434	0	1.7783	0	4.9349	0.3219	0.579	0.7419	1.3059	0.616	0	1.3351	0	4.1085	0.4116	0.6472	0.5929	0.4965	0	2.0277	3.605
IL12 signaling	IL12B	0.0226546	0.4654	1.9675	1.9704	1.998	0.4968	0	0.7971	0.323	2.1108	2.7174	0.9092	2.79	0	1.5485	1.919	1.6345	0.6334	0	0.3393	1.6774	2.1042	0.6053	21.5599	0	3.2967	0.9211	2.5157	0	1.1855	5.6054	8.524	0.6437	0	0.371	0	0.308	2.3765	0.6676	0.7505	14.2427	0.8231	3.2362	0	1.9861	2.267	2.0277	1.8025
IL12 signaling	IL2	0.000939426	0	0	0	0	0.4968	0	0	0.323	0	0.5435	0	0	0	0.3097	0	1.3076	0	0	0	1.0065	0.7891	1.2107	3.1706	0	0	0.9211	0.6289	0.3557	0	2.2422	0	0	1.1581	0	0.4353	0	0	0	0	1.0956	0.4116	0.6472	0	1.4896	0	0	0.515
IL12 signaling	IL2RB	0.0394269	60.0349	55.5829	91.133	152.248	147.044	42.4491	65.7633	188.936	180.475	210.87	5.4552	110.004	116.076	107.158	60.2571	223.929	91.8448	124.616	100.446	163.717	188.848	117.433	458.783	36.8835	179.121	81.0548	76.7296	123.799	125.074	128.924	304.172	79.8198	20.8454	23	137.552	178.948	137.835	164.219	60.0375	305.67	44.8616	124.272	97.2288	209.037	221.844	97.5555	541.775
IL12 signaling	LCK	0.0181909	38.1617	30.9887	78.8177	90.3097	106.309	34.3838	51.0163	88.1703	125.594	105.435	19.0931	82.9016	105.021	121.714	62.1762	117.359	67.1417	81.9939	61.7607	91.2522	120.726	62.3487	394.103	54.7037	92.8571	66.7781	47.1698	64.3899	75.2816	132.847	142.216	77.2449	21.4244	46.371	63.5525	85.9321	119.22	174.232	70.9193	291.153	61.7361	117.799	37.943	175.77	99.101	64.2109	208.316
IL12 signaling	MAPK8	0.0157424	187.551	229.71	214.778	220.579	200.199	178.711	298.127	221.556	151.979	168.478	434.595	231.168	312.851	245.597	371.138	414.514	195.725	131.479	548.72	426.403	386.376	324.455	331.008	278.906	207.692	262.046	240.252	220.562	181.387	219.731	165.994	284.519	112.334	192.161	290.339	353.276	253.887	185.581	227.392	271.433	235.832	141.748	215.801	210.526	232.207	297.623	242.82
IL12 signaling	NOS2	0.0388415	1.3962	3.4432	0.9901	5.5944	16.3934	0.849	4.3842	6.1364	15.3034	3.8043	1.3638	4.7828	28.7425	1.2388	5.0163	22.2883	3.1671	2.5284	17.3066	8.4173	12.888	4.8426	290.425	3.7298	12.1264	7.8292	0.6289	4.6247	10.6698	4.4843	97.8421	31.5417	10.4227	6.3065	1.789	5.236	3.9964	8.6782	3.0019	1.3695	8.6431	12.945	1.1857	7.4479	7.1249	12.1663	50.9845
[truncated: 8 more columns]

## Sheet: Table S5
#AR signaling genes	mutant	mutant	mutant	mutant	mutant	mutant	mutant	mutant	mutant	control	control	control	control	control	control	control	control	control	control	control	control	control	control	control	control	control	control	control	control	control	control	control	control	control	control	control	control	control	control	control	control	control	control	control	control	control	control	control	control
Gene	TCGA-J9-A8CP-01	TCGA-YL-A9WI-01	TCGA-KK-A8IG-01	TCGA-EJ-5494-01	TCGA-HC-8265-01	TCGA-EJ-7789-01	TCGA-CH-5737-01	TCGA-HC-7210-01	TCGA-KK-A8IB-01	TCGA-EJ-A46G-01	TCGA-YL-A8S9-01	TCGA-KK-A8ID-01	TCGA-FC-A4JI-01	TCGA-HC-7075-01	TCGA-EJ-A65J-01	TCGA-EJ-7781-01	TCGA-WW-A8ZI-01	TCGA-G9-6499-01	TCGA-CH-5761-01	TCGA-EJ-5514-01	TCGA-HC-7736-01	TCGA-EJ-5532-01	TCGA-EJ-8470-01	TCGA-KK-A8IJ-01	TCGA-YL-A8SQ-01	TCGA-VN-A88N-01	TCGA-XJ-A83H-01	TCGA-EJ-7786-01	TCGA-G9-6378-01	TCGA-J9-A8CL-01	TCGA-KK-A8IL-01	TCGA-EJ-7218-01	TCGA-EJ-A65G-01	TCGA-G9-7519-01	TCGA-EJ-5515-01	TCGA-EJ-7331-01	TCGA-HC-8256-01	TCGA-V1-A8MG-01	TCGA-HC-7742-01	TCGA-G9-7521-01	TCGA-KC-A7F3-01	TCGA-V1-A8MF-01	TCGA-HC-7750-01	TCGA-EJ-A8FN-01	TCGA-EJ-7794-01	TCGA-EJ-5518-01	TCGA-CH-5792-01	TCGA-ZG-A8QW-01	TCGA-KC-A4BL-01
AKT1	5255.15	6583.87	6826.11	6101.9	7744.66	6746.87	6961.74	5885.13	5812.14	4237.5	5727.92	7974.49	8009.58	7879.84	6952.22	4363.84	9793.82	8271.63	4966.31	4183.18	5441.08	5664.95	4423.27	6021.14	5343.96	7684.55	5828.3	5070.79	5215.77	5627.24	5792.28	6144.51	5210.77	8002.89	4541.82	5436.82	5820.38	6182.24	7248.03	6425.91	6385.16	5754.69	5989.06	6483.12	4884.77	5695.17	6010.77	5673.31	5585.11
APPBP2	1201.63	1013.77	1151.23	1393.81	946.349	1289.18	1597.45	1663.29	784.169	1689.13	1357.88	1163.81	1194.29	1594.36	1384	2421.05	1455.58	1191.62	1808.03	1591.55	1878.48	1850.79	1834.81	1464.98	1141.21	1315.76	1167.3	1611.88	1157.08	1276.35	1323.91	1249.76	1412.85	1239.03	2327.93	1852.93	1495.2	1125.5	1329.46	1513.56	1165.58	1322.33	1325.63	1245.28	1462.55	1741.35	1222.34	1114.79	1100.43
APPL1	1059.22	1692.08	1293.1	1277.92	1325.88	1675.47	1227.98	1359.37	1153.03	1408.15	1645.64	1406.93	2312.29	1127.64	1494.53	1725.73	1343.47	1022.94	2929.22	3258.91	1730.93	1605.02	1547.24	1187.73	922.528	1014.11	1232.08	1467.45	1221.1	1353.7	1169.13	1002.57	1121.6	783.485	1882.63	1876.65	1266.26	1181.58	1195.12	1582.85	1174.22	965.696	1108.65	1180.24	1588.85	1644.93	1324.57	960.767	1349.79
ARID1A	2398.14	2927.2	2728.57	4703.7	4097.86	4185.49	3871.26	3801.34	1749.87	3327.72	4042.28	3799.52	2749.7	3750.54	3565.92	5330.5	3841.65	2167.96	6348.12	3951.02	5769.33	3985.47	4550.41	3303.36	3220.88	2636.12	3405.03	3353.97	3209.84	3567.83	2451.32	3196.97	2217.72	2094.11	3179.36	4344.04	3010.6	2871.16	3424.77	3952.07	2444.75	2019.42	2510.76	2773.09	4102.33	4101.39	4079.54	1537.72	3162.13
ARID5A	789.761	152.484	1120.2	347.253	446.1	95.0861	186.13	580.697	1571.5	266.848	56.37	171.383	507.047	96.6282	143.159	224.91	215.994	904.1	278.602	228.466	659.39	236.38	515.536	971.405	307.143	231.651	1099.37	246.887	381.743	422.646	1348.59	215.964	107.701	258.936	134.94	369.6	112.882	493.992	236.398	488.359	1158.58	721.036	292.279	359.484	361.427	527.43	606.407	870.714	1326.38
AR	320.186	1301.03	469.458	1498.5	417.784	2364.84	848.545	1611.61	130.343	1100	1034.66	1066.56	649.286	943.983	846.287	1898.33	561.203	175.907	2868.82	1784.45	1241.45	1295.4	997.781	675.508	750	158.425	557.233	1797.23	245.999	729.821	252.131	583.521	230.457	261.533	1057.76	2352.2	903.06	654.206	760.225	1305.12	275.343	346.926	638.509	458.292	1613.14	1906.5	881.672	186.315	625.532
BAG1	1587.66	2057.15	2001.26	1335.61	1542.53	2169.5	1537.89	1177.51	2068.42	888.359	1248.55	1552.16	1583.86	1586.56	1120.06	1161.97	1652.39	2338.1	1343.93	1990.87	1523.12	1214.04	1511.7	1496.78	1676.04	1497.4	1891.67	1529.8	1668.62	958.1	2343.85	1860.38	1990.01	1798.32	1605.39	1251.98	1504.93	1515.3	1278.51	1122.14	2500.31	2487.53	1729.38	1725.76	1430.64	1559.94	1676	2338.89	2449.28
BMF	208.959	1359.08	440.887	314.885	890.71	684.705	626.544	559.058	871.24	975	621.889	1136.31	124.551	294.22	736.519	751.226	266.667	149.54	305.41	392.519	564.703	427.966	379.835	222.959	607.143	278.165	500	477.054	198.577	429.372	99.1476	701.641	325.42	259.307	583.725	281.82	219.824	403.872	435.647	294.44	293.452	328.155	408.48	414.598	801.876	541.399	1025.36	378.841	265.532
BRCA1	82.8389	185.932	78.7586	147.053	78.9866	369.308	94.0614	156.64	92.3483	151.63	167.292	174.679	508.89	114.901	72.1551	130.762	77.2763	64.656	445.559	335.486	263.019	106.537	160.431	99.8757	110.44	139.083	87.5409	120.598	70.5394	61.6592	90.6236	105.246	57.9039	48.5968	109.258	129.052	126.349	110.814	175.985	146.606	130.881	79.6117	106.715	97.8153	172.617	243.325	122.054	131.663	88.5106
CALR	36134.5	33187.9	26047.8	29449.4	26452.1	33150.2	42783.6	30536	24823.7	29967.9	36293.7	40215.2	23263	36716.2	40669.7	30058.8	12642.9	38475	22581	20732.4	28293.3	44337.2	25104.9	33793.6	21591.8	33092.9	36636.5	30462.1	24110.8	29840.2	24184.8	38348.9	32964.1	28753.7	24563.9	29545.2	40140.2	31921.9	38352.3	28609.4	34908.5	23865.4	32104.5	25563.1	27776.8	24054.1	25094.4	34813.7	19168.5
CARM1	1117.86	1292.18	1035.47	1319.08	1311.97	1192.82	1121.56	1234.06	1453.83	1330.98	1068.3	1486.25	1550.99	1395.22	1347.15	911.736	1492.32	1116.85	1252.52	1459.7	1348.76	918.281	854.154	1067.55	1216.48	1576.88	1040.88	963.358	1187.91	1279.15	1121.13	1193.43	994.21	1183.76	755.665	932.317	1009.21	1263.02	1414.26	1220.21	1294.81	1166.34	1191.65	1314.3	983.561	1435.85	1274.87	1283.71	1336.6
CASP8	423.967	709.297	341.872	212.587	246.398	356.573	350.737	317.801	467.546	413.587	442.323	281.387	642.285	331.075	629.054	432.821	371.18	606.827	632.878	387.822	327.459	326.574	655.358	292.996	365.934	391.918	347.799	331.555	271.488	297.646	558.995	388.8	274.464	294.178	304.704	379.148	481.236	348.465	335.084	758.97	520.641	280.259	231.808	374.379	462.471	415.005	328.052	315.494	357.021
CAV1	2014.19	352.681	2934.98	1086.51	972.181	966.143	709.446	1255.38	1551.98	664.674	149.562	273.814	232.151	397.352	307.043	1337.69	387.015	1181.87	1051.29	963.516	1281.69	1309.02	591.947	1113.55	1036.81	548.962	908.805	1725.01	2613.52	832.96	1572.9	715.159	1179.5	2606.79	3043.99	1801.19	678.087	1560.75	2200.38	741.989	1419.93	1940.45	4148.23	1540.22	1782.85	1652.59	1187.84	1601.07	2111.49
CCND1	5361.98	6118.42	4892.05	5453.42	6007.54	7434.17	7749.18	5965.44	3950.35	4884.21	7191.73	8748.2	12348.9	4364.98	4277.37	3780.36	7840.11	3334.45	4100.78	3273.87	4677.8	3896.35	3948.29	5999.02	6236.72	9673.15	5250.62	3564.29	7333.19	6927.99	7699.02	4290.85	4580.23	6241.09	4738.64	5897.19	5234.01	5677.04	6257.12	6364.31	4079.77	4060.26	6401.49	4174.45	4647.59	2994.75	2942.01	5040.56	6218.53
CCND3	887.027	1058.53	762.562	1119.68	1400.89	496.655	918.294	974.072	1348.81	783.152	520.968	704.265	290.742	760.018	416.043	672.442	709.422	1159.47	777.438	520.674	756.707	901.634	1279.33	683.796	802.198	906.801	856.604	823.195	1005.33	947.87	1025.12	851.625	855.819	1070.61	903.664	948.025	1152.19	775.701	887.805	939.195	862.247	957.929	938.495	697.12	941.783	948.744	1195.05	1202.36	1558.72
CCNE1	35.8348	34.9238	20.6897	17.1828	11.9225	52.6369	16.3412	26.8064	39.5778	35.8696	8.6373	26.3053	114.97	8.0523	14.9683	11.4416	9.5012	18.0603	79.746	54.3487	16.5702	35.7143	38.0469	22.3788	14.2857	38.2247	23.2704	7.4707	23.118	36.9955	27.8152	12.5523	16.7921	28.5645	25.2469	20.02	26.9334	40.721	35.6473	24.9247	22.6366	20.0647	23.7143	20.854	23.3179	55.6494	27.5523	54.6525	88.0851
CDC42	4440.72	3480.08	4859.11	4081.92	3654.74	4115.87	5161.02	4714.04	4684.43	4352.17	3864.98	5869.27	2822.66	3852.74	4781.04	3671.13	4504.83	5587.14	6048.48	7405.85	4011.84	3829.3	4918.2	4493.16	3224.18	4364.99	4316.35	3518.68	3864.26	4656.39	5389.86	4266.82	3432.54	3518.63	5672.71	4540.85	4061.79	3792.39	5251.41	7187.35	4466.81	4276.38	3595.69	3666.83	3491.53	4400.59	4519.86	5536.67	3935.32
CDK11B	996.244	795.135	657.143	631.684	987.566	679.42	671.622	560.124	1000.81	528.587	610.31	847.589	544.766	858.95	756.795	697.601	435.522	872.317	753.314	594.944	663.219	632.331	700.282	816.374	693.528	960.214	469.17	645.094	833.319	829.837	1025.5	722.401	685.402	840.436	572.442	640.982	548.431	882.203	837.077	750.162	713.912	978.201	805.126	855.715	609.604	676.528	876.092	907.412	1074.6
CDK6	735.777	2773.73	1018.23	551.049	1397.42	1394.03	501.395	454.739	1996.31	642.935	490.965	2938.62	2511.65	1803.42	442.525	2231.45	939.351	759.256	825.625	424.39	434.771	2209.44	1059.61	604.641	1701.1	700.479	723.899	2091.43	893.894	541.48	250.785	1391.37	1642.73	1679.37	992.898	1269.27	900.287	418.558	1270.17	565.872	836.318	1264.72	1191.05	1699.6	2039.99	265.63	907.164	914.188	637.872
CDKN1A	1968.12	3004.43	4632.51	2561.44	1843.02	1020.05	3523.32	6967.07	5975.73	2303.26	982.839	3308.49	3016.12	1699.35	2585.3	618.503	884.244	3855.52	495.104	1789.48	4324.57	3564.16	1696.89	6240.36	1046.15	4726.51	9686.79	1539.31	2311.8	2329.6	5771.2	1571.61	1605.67	3682.23	808.77	1609.61	943.856	897.196	1048.03	2897.56	9625.48	2935.28	1710.99	1424.03	1456.72	3971.39	2002.56	4338.04	3462.13
CDKN2A	39.5579	179.538	56.6502	27.972	79.9801	98.0575	29.4938	25.1915	158.311	63.587	8.1827	105.62	56.748	43.3588	36.4613	6.5381	19.0024	49.4853	59.0459	71.794	40.768	10.2906	24.0964	73.3527	48.9011	98.0948	52.8302	11.7396	30.2312	82.9596	76.716	14.4834	9.8437	136.887	16.1058	11.088	89.5138	70.0935	51.4071	94.4947	50.212	115.858	18.3786	68.0238	7.7726	64.6615	26.2648	211.779	59.1489
CEBPA	1102.04	1339.89	1145.32	1050.55	1193.74	910.959	1107.21	590.709	1521.37	1046.74	1246.05	2257.47	718.194	1476.37	1519.09	666.885	944.418	807.296	649.505	961.503	707.785	748.184	553.266	738.5	1039.56	1971.57	1216.35	1194.24	979.846	604.26	545.087	1732.54	1244.93	1443.81	808.77	703.781	862.66	1000	803.752	727.746	1094.37	596.116	1381.95	1399.21	1124.44	1179	1082.26	1344.58	791.064
CMTM2	0.4654	0.4919	3.9409	1.998	1.9871	0	1.9928	2.5837	1.0554	1.6304	0	0.3986	1.474	1.8582	1.5352	2.2883	1.9002	1.4448	2.0361	1.3419	1.5781	1.816	0.9512	2.0721	2.7473	1.8422	1.8868	1.423	1.7783	1.6816	0	0.9656	1.7371	0.371	0.4353	6.468	3.5647	0.6676	1.5009	0	1.2347	1.2945	0.5929	1.4896	4.8579	0.4506	3.3475	2.4842	2.1277
CREB1	751.6	860.797	930.542	1378.62	843.02	1317.62	994.42	1047.06	710.29	979.891	1241.05	926.265	1063.84	1111.53	959.893	1553.12	1325.73	838.721	1575.92	1608.66	1208.31	1169.79	1501.9	869.043	1171.43	695.413	948.428	1215.94	1159.45	989.35	1061.46	768.587	1001.16	783.114	1410.34	1340.73	934.746	943.258	929.456	994.796	850.723	743.689	869.131	900.695	1231.31	1076.26	1104.92	798.672	1082.13
CREBBP	1816.87	2168.22	1844.34	3251.55	2361.65	2602.56	2223.6	2791.41	1423.75	2798.91	2301.63	2192.91	2166.37	2102.28	1801.57	3539.72	3427.4	1618.93	3041.88	2522.86	3172.54	2355.02	2912.49	2556.57	2648.35	2042.49	2056.6	2436.5	2515.71	2307.74	2499.33	2263.6	1496.82	1558.44	2425	3114.5	1902.37	2680.91	2541.46	2581.76	1794.87	1741.1	2066.11	1986.59	3751.59	2845.33	3260.95	1665.66	3190.21
CST11	0	0	0	0	0	0	0	0	0	0	0	0	0	0	0	0	0	0	0	0	0	0	0	0	0	0	0	0	0	0	0	0	0	0	0	0	0.3961	0	0	0	0	0	0	0	0	0	0	0	0
CTDSP1	4460.73	4456.96	5728.08	6222.18	6465.47	4272.08	5919.09	3597.87	4498.68	8725.54	4709.17	5936.63	2717.64	6015.72	4935.71	4452.76	4979.89	6592.38	3852.24	2287.34	4200.42	4800.54	4399.49	4622.88	8408.79	6320.89	5476.73	4783.35	5267.34	8232.62	4570.66	5900.55	6603.94	6674.83	4506.13	3971.36	4543.02	6007.34	4591.74	3568.61	4745.04	4688.67	5122.89	5591.86	4310.89	3900.64	5341.27	4572.18	4581.28
CTDSP2	3010.59	4433.35	3277.34	4255.34	4717.83	3361.97	3359.9	4137.87	4081.79	4840.76	3304.92	2838.98	3301.7	2668.42	2842.45	6104.94	3534.44	2538.2	3826.79	2589.62	4303.26	4154.36	3688.02	3896.81	4431.87	2264.01	3348.43	3777.3	2668.64	5089.13	3241.36	3853.23	2827.45	2097.08	4956.66	3497.65	3140.51	3566.76	3769.98	3205.97	3352.68	2979.94	4418.58	3089.37	6301.01	4327.14	5999.7	3002.16	4132.34
CTNNB1	8349.01	8115.05	7242.35	8899.48	5212.61	9388	10561.2	11153.4	8365.16	4970.64	6616.14	8648.03	7849.27	9130.74	7612.34	9828.33	6963.02	7278.31	16925.1	11988.2	8089.89	10006.3	9403.57	10140.5	6602.14	8499.2	9856.55	8241.17	7633.08	9521.26	8764.44	6221.74	7790.37	6552.78	9987.71	9873.52	7956.8	6708.24	9273.52	9223.49	7683.22	5744.96	8968.75	7014.84	8672.28	9164.32	10155.4	6699.25	10236.1
DAB2	815.823	1066.9	1060.1	579.021	537.009	446.565	788.76	1458.2	2750.4	1201.09	687.351	193.304	191.617	860.672	739.973	963.714	345.21	898.682	1483.28	1308.06	814.834	638.923	679.455	445.503	874.725	528.238	364.151	1449.66	1230.59	829.036	1050.7	965.24	909.67	1172.26	709.959	1053.05	487.969	611.482	632.645	732.402	810.801	904.207	1461.99	1347.57	1506.27	945.139	1149.47	683.778	551.915
DAXX	1169.98	1255.29	1056.65	1284.32	1309.49	1015.81	1238.74	988.283	1235.36	1093.48	1086.03	1172.18	1340.58	1301.07	1112.26	1030.73	1248.46	1315.51	1235.55	1019.88	1048.4	1085.35	1058.66	994.198	1371.98	1301.94	1116.35	1014.59	1471.25	1062.78	1447.73	1383.33	1117.54	1191.18	904.97	952.337	1117.73	1230.97	1108.07	1103.81	1220.73	1124.92	1188.09	1125.12	1073.59	1184.18	1418.55	1229.06	1105.11
DDX17	8265.27	8339.4	9151.23	8121.88	10453.1	10846.2	5321.64	8179.82	10439.6	12254.9	9556.54	8322.04	10786.5	6704.82	6996.74	7596.93	14780	7292.76	8139.18	9939.11	10294.6	7352	14284.4	10714.5	8808.79	10789	12828.3	6294.56	6374.63	6434.98	15097.4	7657.87	9715.69	5137.91	7646.75	6631.55	8287.95	9143.52	5795.5	6780.88	12503.6	8839.48	5734.13	8096.33	5752.39	7335.59	6717.08	7219.1	12961.3
DDX5	16160.1	9618.79	12930	9448.95	10028.3	13365.5	7586.69	10709.9	13964.1	9233.7	9238.78	14868.9	10832.2	13548.4	14052.6	13002.9	11283	11342.2	9723.92	11618.6	10421.4	9104.72	22839.6	17085.8	9809.34	16611.2	11957.9	8379.58	8694.72	9362.11	21759.5	11133.9	12913.7	8267.39	11257.1	9068.76	11860.2	9760.35	8435.65	14429.7	18247.5	11577.3	6236.28	10176.8	7045.24	6973.08	5859.36	11529.2	14318.3
DNAJA1	4074	3380.72	3038.42	3892.51	4889.22	6069.38	3436.43	4945.29	3850.13	2618.48	2763.95	2117.58	5252.88	3742.48	3654.96	2512.59	2662.87	5369.69	4774.92	6118.26	3676.22	3134.38	3932.78	4285.95	3474.73	2493.82	4196.86	2646.74	4668.64	2177.69	6865.86	2745.41	2799.07	4531.37	3136.71	3111.42	3663.33	2672.9	3339.59	8334.16	4003.79	3034.95	3322.38	2708.54	1995.62	3323.87	3782.13	3443.11	4078.3
DSTN	9903.43	10687.2	18288.7	11194.4	9239.94	7711.31	11800.3	12711.1	13045.4	7521.74	8015.46	8423.28	4240.63	10700	15062	11587.4	7229.77	12795	4365.33	18039.4	14631.2	7042.07	8203.87	6261.5	8538.46	9599.01	9697.48	14091.1	14344.4	8579.6	8615.07	9211.78	14420.4	16928.4	19242.5	13030.3	8782.26	10721	14292.3	11874.3	12597.9	12023.3	18168.2	12627.6	11966.3	12922.4	11150.4	15536.8	10669.8
EFCAB6	68.4119	80.1771	53.202	58.7413	4.9677	143.903	81.3073	68.7922	91.8206	17.9348	48.6419	3.5871	36.8494	57.6052	61.4086	72.8996	41.8052	36.4818	22.0574	104.001	102.578	36.9249	82.1179	69.6229	41.2088	48.8171	32.7044	69.0146	42.6793	6.7265	44.4145	80.4635	63.6943	27.0807	45.2702	49.588	63.3726	58.745	55.1595	46.8365	86.4305	60.1942	45.0573	55.6107	81.9364	42.1314	68.7519	54.6525	50.6383
EGFR	359.716	765.317	786.675	704.092	1572.27	1826.96	1106.78	2208.45	378.354	1361.4	719.154	720.972	1801.18	639.202	1172.89	1932.63	470.575	387.575	399.069	1117.49	2359.26	921.304	1168	779.494	795.538	370.724	974.799	1478.46	434.422	772.876	1005.78	981.944	281.413	332.736	1449.93	2227.45	828.589	670.047	1092.3	1144.61	694.712	647.21	934.932	603.664	2256.97	1270.24	1722.14	484.42	1484.65
EGR1	2493.08	1477.13	6008.87	13634.4	5738.2	1036.61	49192.9	60619.5	2896.57	10753.3	1699.28	40877.2	364.44	10030.1	11233.2	9388.04	1086.3	14632.1	1729.98	7421.96	63932.7	3778.75	7975.27	10875.3	7238.46	13716.2	50437.7	11940.6	4167.75	1085.76	2160.16	2474.41	11830.3	19162	5864.24	7364.6	1814.44	3638.18	4473.92	4349.77	8975.6	10892.6	1339.86	9227.41	17624.8	7500.51	9840.02	15042.5	17915.3
EHMT2	1111.34	1619.28	1271.43	1819.38	1860.9	1104.1	1191.31	1109.07	1347.76	1685.33	1383.79	1636.91	1823.68	1853.28	950.681	1652.17	1954.71	912.407	2010.96	1374.49	1415.31	1306.9	1286.94	932.864	2259.34	1050.95	1242.14	1291	1892.12	1274.1	1067.29	1468.94	1274.46	1529.13	901.052	1045.35	1488.86	1642.86	1372.98	1090.11	1312.92	1137.86	1576.41	1522.84	1327.82	1332.88	1878.45	1921.53	1724.26
EP300	1702.85	2191.34	1876.85	3696.7	2787.88	4036.06	2420.09	3506.79	1126.65	2984.78	2745.77	2725.79	2633.99	2650.15	2304.36	4714.94	3809.98	1490.34	4177.67	3790.66	3906.1	3466.71	3415.35	2631.99	2169.78	2101.44	2140.25	2992.89	2468.29	2520.74	2296.99	2202.45	1394.9	1727.6	2652.66	4006.78	2415.29	2080.11	2739.59	2881.68	1512.95	1682.2	2207.81	2066.04	4013.27	3545.57	3306.79	996.788	2718.3
ETV5	142.408	79.6852	215.763	153.047	75.5092	94.6616	249.502	203.793	140.897	152.174	21.8207	47.4293	22.4781	70.9226	76.3769	182.413	157.72	129.673	129.29	244.234	153.866	264.83	274.572	926.233	239.56	120.661	106.289	307.364	434.499	234.865	172.275	127.132	101.911	109.806	245.939	352.352	642.836	185.581	301.689	102.438	81.0801	190.939	301.172	219.96	302.161	204.348	217.328	222.336	406.383
FHL2	893.543	602.558	1279.8	541.858	958.271	179.984	372.26	1274.11	3260.16	865.217	61.8252	192.507	132.658	165.692	531.952	868.911	265.4	1802.06	302.017	761.889	1161.49	474.274	1281.55	1340.24	407.143	542.515	1857.86	727.499	1324.24	1400.78	3449.08	464.113	404.169	861.388	1169.19	999.769	324.785	1191.59	995.497	794.577	3081.45	1205.83	1729.96	673.784	1633.55	998.31	1887.46	1773.1	2917.87
FKBP4	3411.75	7830.79	7708.87	8191.81	9943.86	7413.32	8451.18	6766.51	10972.6	5566.85	8159.11	7377.84	19235.4	9438.9	12092.5	5211.83	6109.26	8521.94	11011.1	5602.95	9057.86	7156.17	6226.7	7855.78	7239.56	7218.02	4076.1	6406.62	7872.55	5966.37	5367.43	9294.82	6888.25	10859.7	4669.8	6091.01	8431.33	7104.81	8522.7	2645.58	8380.88	4858.25	7224.58	5998.51	6091.47	8754.31	4381.84	7687.38	5563.83
FLNA	19906.5	7015.74	54224.1	25282.3	23723.3	7019.39	8954.96	45298.2	22711.3	20856	1949.77	5051.81	2076.83	10632.5	8149.3	46243.9	6669.83	22937.3	14453.4	17473.5	40362.4	30277.8	10499.7	21305.8	21033	9909.41	18482.4	52439.7	65645.5	27618.8	20681.9	19897.7	20296.5	47392.3	68138.2	63494.9	13517.8	37677.6	78777.1	17858.7	27688.2	19327.5	116361	35438.4	58125.3	47018.6	70411.5	39492.7	51381.7
FOXH1	10.0198	21.8495	10.1576	2.4216	20.1441	17.1325	4.177	1.5212	12.6913	16.4239	5.2051	4.4958	5.8075	3.2302	3.3583	1.1311	10.445	5.5915	6.2236	2.1169	3.1142	3.069	7.2067	3.191	8.5714	17.7169	6.5849	2.6005	4.2146	15.7231	1.8977	6.1249	9.641	3.9508	1.7586	4.3089	4.9312	20.3338	7.2795	8.3265	3.6795	7.8964	2.988	4.6673	2.3318	2.0593	3.5947	5.9373	4.1106
FOXO1	361.14	256.763	481.281	668.132	464.978	216.491	572.738	548.4	422.691	409.783	260.939	349.143	189.037	588.441	418.73	720.17	746.793	539.281	569.76	484.442	892.425	723.971	807.863	520.514	426.374	448.565	674.843	565.991	701.245	490.471	646.03	378.822	495.078	434.033	819.653	896.281	453.51	637.517	684.428	476.034	526.403	615.534	528.83	526.316	584.242	528.332	584.262	426.662	716.596
FOXP1	3460.62	3378.75	2406.4	2742.46	2468.45	2069.4	1939.42	2357.34	3694.99	2429.89	1778.38	1905.14	1357.53	2906.59	1830.74	2963.39	2776.88	4033.23	3482.01	4703.18	2898.21	2526.33	2027.9	2627.43	2087.36	2124.47	2138.99	2768.77	3524.6	1761.21	2962.76	1714.84	1976.84	2389.41	3530.64	2565.64	1820.38	2052.74	2408.26	1923.86	2429.93	2474.43	2738.41	1872.39	2647.55	2348.54	2084.96	1884.89	2043.4
GATA2	6881.68	2948.35	2929.06	5321.08	3377.55	6729.46	2096.85	2330.22	2491.82	3786.96	3834.53	6916.7	3433.63	3414.81	4017.27	3064.73	3890.42	1489.98	3517.98	1724.06	1109.42	2233.66	2082.43	2586.82	5408.79	4533.08	2244.65	2947.35	2286.9	5956.28	958.726	2424.53	2317.31	3242.63	2688.36	2911.83	2863.65	3057.41	3549.72	3900.3	1363.13	1695.79	2315.71	3067.03	2310.74	1384.93	2152.42	1016.04	3834.89
GSK3B	962.885	1873.09	1311.33	1406.19	1111.28	1794.75	1443.6	1589.97	965.172	1057.61	1891.12	1514.55	1447.44	1329.26	2693.15	2091.86	756.928	834.387	1080.47	2223.27	1819.57	1485.77	1436.59	1233.73	1163.74	1194.18	1161.01	1524.01	1044.46	1151.91	829.52	1142.26	918.935	1043.9	1688.93	1871.41	1271.41	953.939	1544.84	1603.4	894.35	905.502	1028.61	1143.5	1554.85	1607.3	1320.45	942.756	964.255
GSN	13987.7	5423.02	17496.6	8264.14	6092.4	2498.98	5063.37	8888.09	10809	7811.96	1653.37	1818.25	792.262	5509.66	4084.82	7062.44	4330.64	5406.54	4574.36	6376.25	7400.84	6546.31	3536.14	5687.11	9550.55	3667.73	5290.57	8146.21	15666.9	14429.4	7852.85	5295.46	6274.46	11324.2	6104.52	9064.76	4074.07	10365.8	10673.2	5137.5	6020.91	10812.9	13839.7	15797.9	7657.65	12380.8	10227.8	10275.9	9007.66
HDAC1	3305.18	1975.9	2313.3	3074.13	5215.1	3287.26	3149.46	2963.23	2261.74	2592.93	3324.47	2884.81	1703.55	3206.69	1810.02	3088.26	3955.03	3164.53	3772.15	2658.73	3719.1	3044.19	3511.1	3938.67	2993.41	3405.68	2796.86	2556.39	3771.78	4720.85	3187.98	2940.46	2604.52	2881.68	2755.39	2288.44	3352.41	4299.07	3633.4	3388.93	2892.13	3042.72	2842.76	2411.12	2418.26	2232.96	2546.39	3226.98	3130.21
HDAC6	771.146	732.415	682.759	1221.18	624.441	1304.46	1058.59	1052.55	837.467	669.565	1038.3	525.309	504.099	1336.07	856.266	1224.91	1172.45	757.45	943.378	945.4	1220.94	1057.51	1313.57	1045.59	1085.71	1200.16	901.887	1046.96	915.234	772.422	1104.08	1017.7	878.981	983.807	839.241	953.261	1088.03	1124.17	1094.56	962.75	1045.4	848.544	860.238	1018.87	1024.04	924.186	1077.89	976.914	1251.49
HDAC7	1468.3	1049.68	1250.74	1150.45	1539.99	1044.25	1173.38	1393.61	1404.22	1830.43	901.921	833.001	1339.11	981.767	1079.64	1102.32	1281.39	945.638	1259.99	814.225	1471.86	1033.9	1160.43	1027.77	1689.01	1301.02	1371.7	1088.58	954.357	1579.04	1423.06	1349.86	1123.91	1022.02	832.276	983.753	1220.71	1391.86	1238.27	902.492	1161.05	1137.22	1147.77	1374.38	1367.66	1240.06	1724.72	1423.45	1917.02
HEYL	977.778	260.207	1567.98	357.642	466.468	403.691	175.767	1201.76	644.855	1255.98	125.014	305.301	127.499	297.317	673.191	315.789	251.465	205.526	1123.23	436.467	655.707	307.506	325.301	574.803	598.901	261.125	399.371	280.683	414.938	1150.78	620.009	148.375	129.705	389.887	210.245	523.909	175.067	638.852	754.221	952.616	314.442	689.32	237.143	343.098	385.393	1086.18	962.784	339.715	329.787
HIP1	341.594	401.377	624.63	917.482	715.847	2551.19	404.544	713.114	367.81	416.304	259.12	207.653	597.697	289.885	1308	1133.38	288.203	202.998	629.145	1020.55	733.561	531.174	883.323	224.202	660.989	169.478	293.082	776.948	545.939	721.413	414.087	286.772	195.715	278.226	716.924	1039.5	303.793	564.753	631.52	1352.78	323.909	546.926	707.873	436.445	777.263	852.54	859.785	429.147	540
HNRNPA1	7711.93	7797.84	7308.87	6802	7221.06	7083.91	4682.34	3243.89	7543.01	4195.11	8307.76	8249.9	9075.63	5715.62	2830.93	4007.19	7255.74	7557.88	5018.91	5500.96	5437.14	4212.17	7553.58	4702.03	8410.44	7193.15	5624.53	4604.06	7536.46	8991.59	8447.73	6189.57	5609.73	5363.83	4878.3	4600.29	6097.63	7767.02	4272.8	3625.31	7844.6	5947.57	5611.41	6451.34	4793.12	3826.74	5751.73	6737.79	6066.38
HOXB13	18803.5	15016.2	10399.5	18022.4	11081	7974.92	21059.4	12468.5	7424.8	10798.4	11099.9	13037.9	7746.84	13828.7	8011.51	11467.5	5844.5	10780.9	25067.4	10798.6	12530.2	15156.2	10115.7	14189.4	12923.6	16620.4	12286.8	10515.1	11720.8	7951.23	7859.13	14368.2	13083.4	16257.7	11112.5	9737.12	15411.8	13624.8	10722.7	16088.2	9607.37	10702.9	11034.3	11067	9868.32	18229.6	13299	10389.6	8076.17
HSP90AA1	21655.4	16923.8	18593.6	30171.4	27359.7	29102.3	21487	28571.4	26336.7	10792.4	23329	22412.9	42122.2	24793.2	29913.6	20411.9	20744.9	26228.6	34572.1	38558.8	33910	24077.5	21096.7	25950.3	19985.2	17047.3	18036.5	20417.6	33548.9	29648	21661.7	22677.2	20400.7	33515.1	29851.4	18777.9	17749.1	25276.4	23788.7	54201.3	22437.8	16324.9	20639.8	17279.5	17845.9	32946.9	22391.2	24312.9	25743.4
JUN	5737.29	9731.43	5880.3	9100.9	9260.8	4082.76	31414.5	19960.1	7113.46	17276.6	5953.4	19659.6	2252.23	9055.48	15521.8	12709.1	9366.27	13413.8	5417.64	8424.05	30862.4	3264.53	11353.5	11137.6	12115.9	9303.34	26618.9	12954.1	10236.5	2148.54	2740.69	6488.57	15243.2	16342.3	2970.42	4481.4	3492.23	8411.88	7981.24	10899.2	11467.3	9594.17	5201.15	21996.5	13447	5487.66	8212.89	15315.1	12759.1
KAT2B	627.341	822.922	776.847	772.028	719.324	297.144	549.223	1127.16	1321.9	644.565	445.505	637.306	375.864	1629.36	1193.25	1111.15	974.188	647.643	438.094	2458.44	795.897	1393.46	775.84	752.59	482.967	558.634	829.56	1382.78	798.459	1017.38	612.831	845.188	1125.65	1120.69	1176.16	1120.2	730.765	552.069	451.032	635.99	1070.09	990.291	775.459	1356.5	1099.5	1158.72	748.546	771.346	825.532
KAT5	1395.49	1022.3	1034.6	1197.94	1940.7	851.95	1161.8	907.812	1102.59	1597.59	1725.08	1032.69	974.861	1112.87	981.646	1113.67	1189.99	1175.52	875.387	753.039	906.752	1187.59	1044.07	1077.41	1083.41	1493.53	1116.65	917.346	1230.4	1408.31	1118.37	1168.12	972.05	1413.18	1072.73	842.479	982.683	1106.24	1142.5	1042.46	1049.37	1080.81	1102.45	1070.18	952.655	959.455	1230.45	1151.29	1142.13
KDM1A	2009.54	2476.64	1697.04	2559.44	2217.59	2435.73	2271.02	1779.88	2296.04	2205.43	2049.78	1754.48	2240.81	2182.19	2183.07	2088.59	2512.75	1841.79	3289.61	2003.52	1685.17	1642.86	2434.37	1863.24	1934.62	1750.05	1945.91	1701.89	2129.22	2148.54	2046.21	2171.23	1691.37	1427.48	1759.88	1924.69	2096.84	2119.49	2031.52	1917.83	2154.18	1181.23	1840.23	1766.14	1915.63	1601.67	2011.83	1350.79	1946.81
KDM3A	682.722	1107.72	952.709	1025.37	1178.34	957.653	794.739	827.122	766.227	639.13	923.287	831.806	2149.79	1007.47	977.931	1372.34	1729.22	739.39	1589.83	1533.51	783.272	811.441	1685.16	879.818	1223.63	719.361	1090.57	1166.49	924.126	1434.42	635.262	717.734	888.245	721.162	1066.03	1135.29	1116.94	937.25	831.144	1171.73	935.507	768.932	751.745	992.056	1448.3	1261.91	1105.7	1204.22	1037.45
KDM4C	544.968	598.623	569.951	663.337	543.467	743.284	567.955	456.031	464.908	467.935	509.149	713.432	162.137	607.643	403.377	698.594	959.62	372.043	791.351	792.418	632.562	555.69	834.813	495.234	541.209	632.78	598.113	605.479	485.477	582.399	518.17	539.749	654.314	353.533	516.69	653.269	596.099	482.644	392.12	400.164	554.39	452.427	423.301	637.041	564.811	619.579	534.823	499.946	490.213
KDM5D	299.244	949.336	1048.77	1454.15	1294.09	923.269	685.931	1070.96	811.61	3456.52	1024.21	872.061	975.034	1263.29	899.252	420.726	1610.77	873.036	1217.91	1074.23	1210.42	901.937	1487.63	1230	368.132	491.855	977.359	999.288	1154.12	1214.69	1411.84	946.25	898.089	304.194	965.04	1144.84	1213.19	1363.82	903.94	650.507	1116.19	786.408	981.774	1078.45	1145.49	984.342	1181.91	1019.77	1538.72
KLK2	229156	163784	141577	48565	87576.3	198266	181511	99452.9	122835	85546.7	237011	133364	28891.8	241271	163316	115436	216365	120456	33953.1	9960.24	77745.9	196965	171649	129610	204941	184960	176367	172513	65138.7	117744	63631.7	222152	263305	191560	172121	153908	179784	136923	105290	175304	146747	93720.3	119343	157554	121086	99199.1	109487	54431.4	63304.3
KLK3	962651	278257	539627	61630	294215	461862	1.04155e+06	595758	260874	205188	596015	570219	68015.5	823382	681716	422919	103920	526334	76150.6	31570.9	114077	696657	518347	790975	521492	1.02918e+06	639843	537337	418522	506188	125138	683595	723580	985707	559454	537734	644711	357232	633791	443104	410491	398645	497446	395527	395681	237479	256647	185272	137308
LATS2	701.338	354.156	925.616	885.115	958.271	1098.58	698.685	1100.68	406.86	1278.26	993.749	1791.55	583.326	465.797	591.057	733.246	934.917	513.997	428.932	567.307	980.8	642.857	716.867	862.412	589.011	606.529	887.421	717.894	637.226	958.52	703.455	657.226	440.649	388.033	630.736	1054.9	451.53	782.376	569.981	660.915	720.254	564.401	619.537	577.954	665.855	960.46	669.751	540.936	936.17
LIMK2	1099.24	2036.89	1147.78	904.695	1744.66	865.963	1522.92	1143.95	1598.94	984.783	1215.59	852.132	785.26	1966.01	815.966	1973.52	324.307	1249.05	1170.06	1980.37	1874.54	1878.63	1889.03	2019.48	959.89	1867.95	1824.53	2078.62	1002.96	1029.71	1485.87	1873.19	1783.44	1635.23	1705.9	1819.05	2066.34	1306.41	1270.92	991.783	2572.34	2145.63	1887.66	1432.97	2876.2	1531.37	2447.77	1160.75	2147.66
MAK	104.712	85.0959	141.872	27.972	19.8708	64.0982	27.8996	7.7512	76.5172	55.9783	45.0051	67.7561	29.848	9.6009	11.1303	12.4224	77.9097	33.9534	5.7689	59.7165	20.7785	27.2397	37.0958	31.4961	10.4396	5.5265	128.931	4.2689	43.2721	20.7399	31.4042	21.5642	15.634	22.2581	21.3292	23.716	29.3098	32.7103	5.6285	18.625	242.005	36.246	7.1143	26.8123	160.31	8.1108	51.242	115.516	16.5957
MAP2K4	990.343	814.56	814.778	1060.14	810.73	1248	1344.76	1354.53	791.557	769.022	1067.85	926.664	1217.5	1257.71	1060.45	999.673	1668.41	1110.71	745.201	629.372	1366.65	1687.35	1461	1444.26	848.352	1071.21	1241.51	1163.64	1063.43	1073.99	1271.42	1083.36	1274.46	1265	1426.45	1378.3	1527.28	889.186	690.807	786.634	1009.18	849.838	931.974	1080.44	1107.6	921.032	978.234	860.777	911.489
MAP2K6	80.9773	116.576	86.2069	328.871	270.74	41.1757	113.99	84.2947	42.7441	317.391	95.0108	76.9231	139.291	193.876	121.666	179.47	381.314	125.7	164.582	67.7682	59.9684	110.775	332.594	96.5603	256.044	25.3296	117.61	173.248	244.813	357.623	115.298	239.137	69.4847	133.178	121.446	99.4841	257.451	189.586	128.33	120.789	199.202	34.9515	161.85	139.523	284.349	61.282	89.8667	227.305	68.0851
MAPK14	598.022	1169.21	996.059	1295.1	951.813	1009.02	951.774	835.196	682.85	951.63	836.004	906.736	1203.87	728.118	847.822	1060.15	1601.9	599.964	1288.49	1288.27	976.854	1032.69	1003.8	707.418	1254.95	577.055	662.893	995.375	901.601	1168.72	635.262	769.231	786.914	771.614	1047.31	1148.53	880.879	916.555	900.938	1174.75	722.724	950.162	982.367	869.414	1039.59	1158.72	1060.12	899.904	1001.7
MAPK8	187.551	229.71	214.778	220.579	200.199	178.711	298.127	221.556	151.979	168.478	434.595	231.168	312.851	245.597	371.138	414.514	195.725	131.479	548.72	426.403	386.376	324.455	331.008	278.906	207.692	262.046	240.252	220.562	181.387	219.731	165.994	284.519	112.334	192.161	290.339	353.276	253.887	185.581	227.392	271.433	235.832	141.748	215.801	210.526	232.207	297.623	242.82	188.8	265.532
MDM2	1929.49	1659.62	1120.69	1319.88	1568.8	1630.47	2033.48	2500.74	1138.79	1279.35	1553.81	2864.49	2867.25	1794.74	1531.38	1586.14	1659.54	1635.18	1608.15	2720.46	2121.25	3128.63	2095.75	1950.27	1915.38	2217.03	1850.94	1657.42	1419.68	1920.96	1799.46	1242.68	1495.66	1456.05	2542.53	1805.81	1732.84	1527.37	1391.74	1651.05	1484.96	1546.93	1408.04	1208.54	1657.19	1657.77	1502.76	1707.89	1699.57
MED1	1030.37	979.341	1185.71	1442.56	1053.65	1829.98	1242.33	1403.3	771.504	1483.15	1356.97	1364.69	1509.72	1431.46	1160.62	1625.69	1135.71	898.32	2038.44	1923.34	1862.7	1607.75	1489.85	1230.83	1076.92	937.196	1109.43	1422.27	1106.7	609.865	1183.04	1141.62	774.754	943.001	1393.8	1748.21	1311.81	1066.76	1300.19	1669.68	1071.33	991.586	1026.83	1056.6	1494.93	1518.76	1492.46	884.998	1236.6
NCOA1	1528.8	594.196	1539.9	1858.14	1634.87	4542.91	1525.71	1922.95	836.939	1116.3	2383.45	3003.19	1043.57	1367.97	1490.31	2220.66	1806.49	1171.75	2039.12	980.626	2003.95	1764.53	2221.62	1413.59	1031.87	1307.47	1203.14	1591.25	1858.33	1751.68	1302.38	1125.2	1086.28	1101.78	1987.97	2606.91	1995.05	1357.14	1800.38	2159.41	1229.37	1180.58	1451.32	1203.08	2127.11	1374.34	1739.14	727.251	1746.81
NCOA2	387.667	599.115	485.714	1811.39	433.681	3465.97	880.829	1577.05	142.48	778.261	1739.74	1271.82	530.263	1129.19	816.734	3314.16	986.857	266.57	2007.56	1494.25	1725.67	2097.16	1045.02	1051.39	1048.9	328.364	624.528	1173.96	299.941	1345.85	507.402	539.427	274.464	290.468	1387.71	1824.9	1050.8	736.983	1635.27	2198.03	325.555	517.799	600.566	553.625	1573.63	1891.63	912.314	247.799	837.447
NCOA3	776.731	1023.12	1047.29	985.415	699.95	1229.75	1160.22	1423.32	668.602	709.783	969.201	1145.87	674.712	1032.25	1224.33	2330.17	1045.76	620.553	1909.15	3389.75	1982.9	2032.69	1720.99	1080.81	1008.24	934.894	1261.64	1146.57	958.506	1032.51	868.102	668.49	724.957	1044.65	1193.13	1558.48	1319.34	1118.83	1537.34	2254.18	710.376	866.667	789.095	1029.29	1434.7	1354.96	1158.48	825.377	1272.34
NCOA4	5242.12	5150.52	5774.38	11047.4	7873.32	3750.38	8565.56	5285.7	5391.03	4784.24	7669.05	6016.34	4557.9	7131.28	4852.04	7855.18	6996.04	7215.1	9672	12165.7	5645.19	7476.09	8424.86	7246.17	6362.09	7939.69	8044.03	7626.47	6620.63	5362.67	7984.3	6443.19	6294.15	5676.18	12663.9	10907.8	8630.56	4931.91	5957.6	9302.38	6195.42	7719.09	5770.29	5935.45	8369.82	6542.75	8466.78	6234.11	5496.17
NCOA6	1165.79	2134.78	1489.66	1739.06	1452.56	2200.56	1364.29	1760.5	1015.83	1738.59	2055.23	1490.24	1583.79	1780.5	1591.25	2206.93	1764.05	1111.79	2836.58	1886.1	2117.83	2040.86	1737.48	1433.07	1442.86	1657.94	1610.06	1639.63	1641.97	1192.83	1389.86	1482.78	982.629	1418.58	1446.47	1928.39	1421.13	1287.72	1774.48	2152.83	1256.95	916.505	1472.07	1281.53	1954.17	2073	1875.1	1244.59	1342.98
NCOR1	1598.14	1190.36	1587.19	4510.69	2212.12	4505.13	2644.48	3065.29	800	2362.5	2289.35	2688.72	1498.3	2075.03	1704.86	2573.72	2767.38	1545.6	4092.5	1768.01	4163.86	2872.58	2642.99	2388.31	1884.07	1828.8	1735.22	2663.47	2414.94	2516.26	2080.31	2052.14	1165.03	1467.55	2510.76	3454.22	2467.97	1890.52	2684.05	3589.98	1505.54	1349.51	2207.21	1704.57	3031.65	2903.01	2797.2	1372.52	2503.4
NCOR2	2237.11	3934.58	3608.87	4770.83	4211.13	4342.55	3544.44	5533.41	4237.99	5393.48	4380.5	5214.83	3324.18	3974.45	4608.71	4897.68	5063.5	2180.6	4136.95	3898.35	4649.66	3442.8	3033.61	4346.04	5707.69	4409.66	5372.96	4521.88	2472.44	4500	3574.25	6075.64	3419.8	2387.55	3154.99	4617.85	2954.35	4579.44	3177.86	2714.6	3870.44	2722.98	4503.35	4540.72	5733.61	5473.25	5951.03	4380.28	4633.19
NKX3-1	22098	34077.2	18501	21879.3	17001	18186.5	30888	19860.9	15518.2	24160.9	28832.8	26862.5	27498.8	38253.9	21200.5	31343.6	19704.2	30987.2	23454.8	68379.4	26037.3	35112	26856.7	18980.1	43239.6	36169.8	20835.2	35878	26436.3	17465.8	15894.1	32044.1	35188.2	30905.7	40519.5	22182.8	28872.2	30004	19973.4	24624.8	16124.6	12209.7	30710.1	28150	25319	21780.6	21800.3	22188.9	14456.2
NODAL	0.4654	60.0098	2.9557	2.3976	3.4774	0	0.7971	1.6148	10.0264	12.5	0.9092	3.1885	3.3164	1.5485	1.1514	1.3076	1.9002	0.7224	1.018	0.3355	0.526	10.8959	2.8535	0.8288	1.0989	1.8422	1.2579	2.4902	4.7421	6.1659	2.2432	2.8967	0	1.1129	3.9176	1.232	0	2.6702	3.3771	0.5478	1.2347	2.589	1.7786	3.4757	2.9147	0.6759	1.8025	1.2421	3.4043
NR0B1	0.4654	0.4919	0	0.7992	0.4968	0	0	0.6459	1.0554	0	0	0	0	0.3097	0	0	0	0	0	0	0.526	0	0	0	0	0	0	0	0	1.6816	0.8973	0.3219	0	0	0.4353	0.308	0.3961	0	0	1.9173	0.4116	0	0	0.993	0.3239	1.5771	0.2575	0.6211	0.4255
NR0B2	0	0.4919	0.4926	0	5.4645	0	0	0.323	1.0554	0	0	0.7971	0	0	0	1.6345	1.2668	0.3612	1.018	0	0.7891	1.5133	0.9512	0.4144	0.5495	1.8422	1.2579	0	0	0	0	0.3219	1.1581	0.7419	0.4353	0	0	0.6676	0.3752	0.5478	0.8231	0.6472	0	0.993	0.3239	0.6759	0.515	1.8632	1.7021
NR2C1	262.013	254.304	184.729	220.18	319.921	324.736	191.71	211.221	253.298	296.739	260.029	198.884	336.066	97.867	137.786	236.352	369.913	178.075	448.274	237.86	279.064	196.126	476.538	251.14	343.956	98.5553	187.421	204.554	275.045	391.256	279.946	153.202	173.133	191.791	201.54	235.312	275.671	287.049	161.351	329.773	306.211	289.32	180.229	184.707	187.191	136.307	224.538	204.947	314.468
NR2C2	653.841	838.559	698.537	795.616	891.153	1253.33	659.219	958.902	474.232	1035.2	865.798	819.538	743.867	626.739	725.934	1243.67	1107.03	397.099	1359.79	821.065	853.406	912.249	1009.95	805.727	637.088	742.43	647.553	797.972	584.25	908.145	801.018	632.05	478.61	324.13	1094.29	1062.51	737.859	862.604	820.161	1096.23	567.803	650.168	711.751	428.411	1047.57	1048.12	949.664	475.651	968.251
NR3C1	1045.26	409.739	884.729	923.077	651.267	280.164	838.581	1172.05	324.011	739.13	421.411	471.104	44.9562	675.158	413.356	1620.46	559.303	605.382	888.065	4024.49	2073.65	1263.01	1216.55	936.593	668.132	980.947	733.962	1066.52	920.569	597.534	826.828	540.715	891.72	557.565	1840.41	1519.67	989.405	790.387	741.088	1447	735.894	853.722	919.524	1006.95	1275.68	2552.66	1377.87	1019.15	1413.62
NRIP1	1749.85	3074.27	2088.18	2512.29	1900.15	2437.01	2334	1519.24	1697.1	1635.87	3379.47	3909.53	3773.74	3455.7	2340.05	5990.19	4469.36	2366.99	2932.28	9389.25	3212.52	3791.77	3594.48	2101.53	2691.21	3034.03	1811.95	3213.09	2627.74	2244.96	1956.93	2606.37	2082.22	1676.03	3239	3047.36	2413.31	1781.71	2767.35	1586.96	1651.23	1326.21	1453.1	2815.79	2971.73	2421.76	2117.4	1177.51	1180
NSD1	1056.43	1657.65	1245.81	2187.81	1634.38	3597.57	1754.09	1963.97	936.676	2977.17	2181.61	3015.94	2254.81	1246.87	1572.83	3354.04	1466.98	839.082	2435.48	1623.08	2443.45	2088.38	2159.48	1381.27	2153.85	1366.88	1730.19	1748.84	1091.29	1780.27	886.048	1534.92	996.526	928.533	2356.23	1925.62	1671.85	1455.27	1950.09	1830.46	1132.65	1036.25	1392.63	1167.83	2552.01	2649.77	2595.32	1227.2	1587.66
PA2G4	2507.97	3096.9	2951.23	2952.65	4214.11	3527.52	2483.86	2178.74	4120.32	3227.17	3510.4	5495.02	5899.22	3196.78	2946.84	2237.66	3432.46	4050.21	3910.27	2873.1	2686.74	2899.52	2442.61	2529.63	3434.07	3386.34	2637.11	2336.89	3121.52	2562.78	3587.71	2906.66	2506.08	3405.86	2146.85	2350.04	3325.87	2958.61	2658.54	3166.8	3275.3	3640.13	2997.49	2705.56	2269.93	3127.63	2608.71	3516.39	3045.96
PAK6	120.847	61.5691	140.394	394.713	242.921	676.792	324.982	55.7023	47.8206	99.4565	456.997	16.8992	118.931	8.4581	141.624	362.21	441.488	122.315	159.024	201.161	669.855	378.266	221.322	48.2801	200	213.018	249.685	177.873	243.343	16.3173	285.653	382.411	86.2768	205.516	286.857	61.9081	217.051	277.704	374.109	508.296	176.22	246.602	91.7093	340.119	119.313	185.299	176.242	264.233	636.596
PARK7	6714.14	5306.44	6050.25	5320.28	9495.28	5607.96	5949.38	4697.9	6958.84	3548.91	5508.81	7305.7	3157.99	5514.62	7519.09	3987.58	5422.01	7448.08	4088.76	3361.23	3665.97	4451.88	5399.49	5995.86	4695.05	7210.19	4796.23	4863.04	6471.25	4832.4	5389.41	7314.77	5568.62	7664.94	4634.11	4754.29	5768.1	5694.26	5796.25	5565.05	5859.58	6600.65	5636.31	5352.04	3934.57	4334.35	4522.43	6699.9	3791.91
PATZ1	1900.64	2075.75	1609.36	1812.19	2049.18	1014.96	1421.68	739.597	1577.31	1564.13	1927.49	1035.07	1600.74	1709.27	1411.63	1734.88	1049.56	1287.7	1625.8	1580.14	1696.74	957.324	988.269	735.184	1647.8	1044.5	1054.72	1595.52	1661.53	734.305	900.404	1750.89	1558.77	1479.42	1122.61	878.109	1285.28	1363.15	1224.39	765.544	1459.85	1258.25	1345.79	1438.93	1394.54	1187.56	2016.98	1180	1315.32
PAWR	398.837	443.187	405.911	421.179	261.798	547.169	391.79	500.924	420.58	359.783	476.872	426.066	285.951	347.49	485.895	468.454	494.062	317.139	547.023	888.032	528.932	407.688	443.247	373.394	544.505	245.928	329.56	392.743	293.42	400.785	372.813	266.173	303.416	228.145	466.632	491.26	270.918	367.824	345.591	657.902	344.487	572.816	324.294	277.061	417.455	518.193	269.085	365.178	339.149
PDE9A	3018.03	681.751	1881.28	2018.38	2145.55	1598.21	2374.65	1484.04	728.76	2415.76	2614.84	2138.3	1966.65	1037.2	1221.26	2166.39	2514.01	920.354	517.84	528.726	2283.53	2236.99	1824.67	3309.16	2315.38	3922.87	2782.39	1581.64	1863.07	2656.95	1407.36	2955.91	2199.19	2328.2	2011.48	1512.9	2340.03	3471.3	2182.36	3512.46	1416.23	1325.57	1897.74	1827.21	1073.92	1502.31	2091.65	1316.63	1288.94
PELP1	2010.47	1629.61	1391.63	1906.09	1982.61	1840.6	1796.73	1662.64	2240.11	2428.26	1707.92	2144.28	1914.69	2230.19	1529.84	927.754	2406.97	2085.24	1159.2	799.463	1793.27	1627.42	1607.48	1808.95	1560.44	2328.02	1606.29	1429.03	2166.57	1569.51	1868.1	2093.02	1744.64	1875.61	1135.67	1333.64	1706.7	1871.16	1010.88	865.516	1642.59	1779.94	1711.58	1613.7	1257.87	2048.21	1728.32	1950.1	1908.51
PIAS1	221.059	361.535	365.025	517.882	478.39	574.761	416.899	554.213	195.251	271.196	540.061	725.389	211.147	417.483	397.62	771.494	483.294	214.557	600.301	649.837	572.593	543.583	754.28	295.897	508.242	223.822	479.874	537.531	435.092	293.161	315.388	327.969	285.466	259.307	581.548	895.973	484.008	295.06	449.906	437.688	326.378	307.443	494.444	417.08	672.332	696.632	438.519	326.052	469.362
PIAS2	339.732	480.571	265.025	357.243	243.418	469.063	381.427	497.694	431.662	230.978	393.681	360.303	549.424	470.133	401.075	553.122	160.887	310.999	253.49	256.647	390.058	388.317	490.171	401.989	230.22	219.216	393.082	414.799	193.242	217.489	232.391	351.464	228.72	329.049	395.244	427.196	354.094	242.991	188.368	306.217	397.169	242.071	375.872	408.639	504.249	325.11	285.822	214.263	367.234
PIAS3	931.705	750.615	735.468	870.729	1136.12	1194.52	703.467	1047.71	589.974	1044.57	863.28	701.076	968.77	782.316	930.723	918.928	858.907	584.432	1178.54	1229.89	1460.28	829.601	855.105	721.094	855.495	1382.54	855.346	751.334	735.625	693.386	752.804	636.949	648.524	874.743	663.818	902.441	758.095	832.443	1093.43	1382.63	683.213	688.026	756.488	665.839	872.477	1138.9	863.905	1156.4	1101.28
PIAS4	302.967	447.614	315.764	423.177	342.275	265.307	355.122	352.358	468.602	395.109	438.686	381.825	373.653	338.199	442.909	366.133	362.312	369.153	462.527	281.137	451.604	316.586	320.545	448.819	395.055	425.538	414.465	319.815	271.488	297.646	437.416	441.262	291.836	340.178	214.598	295.988	382.216	283.044	416.51	253.081	374.532	345.631	368.758	409.136	395.432	457.362	466.843	374.494	357.021
PIK3R1	753.927	1796.36	1561.08	1259.54	1098.86	974.208	1210.84	1488.24	737.203	767.391	1743.38	1297.33	971.718	970.308	1276.53	2751.88	1248.46	832.22	1106.26	3504.49	2359.55	2187.35	2023.78	830.916	1708.24	822.522	1260.38	2564.92	2307.05	1113.79	1039.93	1104.6	1085.12	1805.5	3032.24	3278.05	1638.18	1408.54	1502.44	1337.99	943.327	1105.5	1909.01	1411.12	2277.06	1709.36	1667.56	1048.33	2362.98
PIK3R2	1539.77	1836.67	1245.05	2385.93	1721.98	1772.36	2030.75	3841.14	1567.24	2180.92	2295.52	1396.01	2474.83	1429.12	1524.64	1615.41	2483.79	1282.64	2353.94	1721.82	2133.89	2268.57	1282.62	1751.04	1710.38	1762.02	1791.75	1385.44	1670.48	1338.33	1451.48	2074.11	1236.25	1638.74	1009.29	1638.75	2486.86	1800.01	2131.05	1183.91	1626.19	1292.85	1916.36	1746.07	1531.1	1957.2	1697.2	2418.37	1674.84
PKN1	2911.93	5292.67	3548.77	2960.64	6353.2	3413.76	1785.17	2240.75	5729.82	5177.72	5207.86	5713.83	6474.44	2643.65	1952.79	2168.36	1616.47	3182.23	2432.42	1851.88	2023.41	3018.46	1863.67	2355.99	3931.32	1622.94	2613.84	2348.63	2651.45	3598.09	2527.59	4063.08	2850.61	2611.61	1574.01	2858.86	2662.84	3644.19	2764.73	1969.87	3174.47	3862.78	3958.52	3005.46	2894.01	3731.22	3533.9	3638.12	3025.11
PMEPA1	23709.1	24919.1	19333.7	25785.7	21619	8671.36	20743.9	25680.4	10261.4	13041.7	42956.6	11010.8	5872.95	19186.5	21510.9	27800.4	22408.9	11973.7	21405	1954.17	11686.4	45368.6	16154.1	23519.8	22005.8	19530.7	25076.8	27100.1	12941.5	25811.7	3822.79	32576.3	30822.5	19319.4	31039.6	17976.2	19872.1	18217.4	8770.06	19852.9	14462.7	24746	21303.2	17693	18701.2	22773.1	16620.4	13813.2	5966.13
POU2F1	42.3502	28.5293	49.7537	159.441	180.825	168.523	118.374	78.8042	49.6042	44.5652	32.2764	43.4436	44.9562	125.121	34.9261	185.682	85.5107	108.001	173.066	130.504	133.351	102.3	64.6798	61.7489	47.2527	49.2776	36.478	129.491	228.216	34.7534	52.9385	55.037	50.3764	93.4839	120.14	166.32	125.557	56.7423	92.3077	64.3659	49.8004	66.6667	105.529	39.7219	116.266	88.3181	108.664	28.5684	51.9149
PRDX1	6809.07	5270.54	5699.01	3925.67	6832.59	5089.23	6043.05	3980.91	7941.42	3184.78	5216.05	6901.55	4785.26	5649.96	6882.36	5037.59	4260.97	7917.28	5668.75	7535.02	3470.54	6238.2	4970.83	4636.55	4530.22	6136.22	4925.79	4552.12	6243.03	6729.26	4854.19	5500.8	5215.98	9280.88	4405.58	4541.16	5636.99	6197.6	5412.76	10359.6	6465	4521.68	5692.04	5560.08	4883.15	4462.54	4720.45	8746.27	4231.91
PRKCB	177.312	45.7452	272.906	182.218	117.238	54.7594	44.6393	232.86	144.063	71.7391	15.0017	46.6321	33.5329	194.495	38.7642	443.609	104.513	144.483	55.3132	230.814	156.76	263.923	358.592	149.606	314.835	41.4485	54.717	431.519	749.852	88.565	145.805	193.756	188.188	223.323	540.196	676.677	144.965	180.908	234.146	217.201	80.6685	223.948	784.945	392.254	393.165	210.657	330.885	267.052	202.128
PRKDC	2426.06	1333.01	2918.72	4026.37	2673.12	13298.5	2815.86	3645.34	1887.6	2211.41	7437.21	2776.4	6763.33	3782.74	2766.84	7331.15	2222.01	1992.05	4471.2	40073.8	6114.94	5947.34	3843.69	1964.77	3802.2	2326.64	3041.51	3717.54	2167.16	2201.79	2747.87	2765.37	1784.6	1893.05	4807.79	4851.93	3785.72	3479.31	5383.86	6429.47	2806.52	1987.06	2757.98	2355.01	4811.58	5644.7	4219.36	2693.5	3509.36
PRMT2	1976.03	2022.13	2132.02	1727.07	2169.9	1151.22	1585.49	1378.75	1788.92	1740.76	1718.83	1523.71	998.618	1743.33	1557.86	1779.67	1950.91	1711.76	366.153	1375.83	1580.75	1515.74	1621.75	1639.04	1688.46	1890.05	1588.05	1538.95	2349.73	2117.15	1786.9	1959.77	1940.36	2401.65	1708.52	1518.13	1602.53	1836.45	2017.64	1983.84	1865.66	1967.64	2319.86	1833.17	1607.96	1720.18	2006.16	2181.13	1867.23
PSMC3IP	108.119	97.6586	92.1823	32.3876	81.0184	153.118	35.7314	15.9482	88.7863	82.0054	131.029	130.375	205.811	49.237	50.7465	30.9088	16.6081	39.2234	160.588	82.9623	46.4834	50.5327	72.9169	46.378	100.643	92.4992	48.5157	61.7147	94.8488	132.915	47.528	75.5809	78.4598	71.5523	55.012	73.1224	53.1577	68.231	90.6229	122.64	70.2598	85.3981	72.9098	56.2314	55.0723	56.2825	59.4845	155.201	43.3787
PTEN	1537.17	1609.94	1583.74	1934.07	1623.45	1882.2	873.655	890.423	1546.17	1589.13	1584.73	1412.91	1475.45	1938.14	301.286	2131.42	2620.43	1574.86	3758.24	840.728	1998.68	2170.4	2248.89	1644.43	2241.21	1563.53	1262.89	2159.37	2452.28	1846.97	1634.81	1265.53	1847.13	2111.92	2717.96	2430.74	1949.9	1777.7	875.797	671.871	1775.94	1573.46	2194.17	1617.18	2316.89	1473.92	1897.5	757.062	1787.66
PTK2B	2672.25	2208.56	895.567	1672.33	1636.36	699.562	2086.49	1900.99	1556.2	2147.83	587.794	1005.58	697.19	2099.18	1489.93	996.404	1577.2	1715.37	532.432	792.418	1795.9	838.68	1646.8	1138	2387.36	1342.93	1277.36	1988.62	1032.01	735.426	2609.24	2362.09	1437.75	1346.24	1434.28	1272.35	1240.52	1334.45	675.422	663.38	1729.02	2498.38	1790.43	1770.61	1966.15	829.559	2063.33	1645.79	1488.94
PTK2	1922.98	2364.98	2001.97	1962.04	3052.16	3785.61	2083.3	2417.74	2191.03	2845.65	4721.9	1841.77	5611.79	1820.45	1892.15	2875.45	2128.27	1672.39	3642.86	2422.21	2247.76	2714.59	1845.28	1955.24	2442.31	1733.93	2027.04	1940.59	1669.24	3037.56	1786.9	1696.49	1664.74	1714.99	2379.73	2401.79	2050.1	2468.62	4303.56	4571.62	1688.69	1278.96	1762.57	1719.46	1807.46	1489.02	2118.18	1624.67	2145.96
RAC1	5360.33	8472.7	6773.89	4435.56	6329.86	4184.21	4764.45	4312.27	6076.52	3967.39	3601.77	5075.33	5540.67	4362.51	4718.86	3938.87	3823.91	6272.35	3219.36	5946.83	3768.02	4179.18	4851.93	4058.02	4806.59	4813.55	5311.32	4085.38	6195.61	5771.86	5436.97	4219.5	5599.88	6018.21	6297.35	4506.66	4297.46	4869.83	5660.04	6203.78	4596.87	4300.32	4949.78	6197.62	4026.54	4524.28	5369.86	5426.13	4810.64
RAD9A	316.012	516.36	343.66	261.199	515.748	269.51	266.536	221.921	381.546	859.63	524.528	598.099	940.636	416.972	306.425	266.123	713.976	259.39	172.357	197.501	269.816	272.57	355.26	284.666	537.121	427.504	417.094	283.87	242.774	1509.99	303.76	408.32	569.409	376.277	273.206	223.587	336.881	463.378	329.437	170.633	307.404	431.592	256.334	419.007	216.62	198.531	324.486	378.183	403.068
RANBP9	1459.92	2139.2	1427.09	1044.56	951.813	1256.49	1434.83	1587.07	1145.65	910.87	1092.85	960.144	1257.67	1142.5	1382.46	1007.52	672.051	997.652	2090.36	1439.57	1497.37	1486.68	1236.84	1702.03	1096.7	1667.15	1139.62	1029.53	1141.67	1084.08	1041.72	1132.6	1067.17	1216.78	1430.8	1844.92	1188.24	997.997	1236.77	1565.6	965.552	1597.41	1038.1	1100.79	1033.76	1747.44	1128.35	929.714	1045.96
RAN	2023.97	3825.38	3191.63	3396.2	3191.26	3141.24	3750.1	2826.94	4821.64	2492.39	3264.46	3626.94	5173.65	3751.46	3405.49	2501.14	3201.9	4340.26	7858.54	6054.18	1637.56	3444.31	2769.18	3058.02	2501.1	3063.5	2849.06	2860.19	2486.07	2991.59	3892.33	4350.5	3138.39	3316.45	2368.85	3382.15	3660.16	2708.28	2004.5	3060.81	4316.59	2502.91	3072.19	2783.52	2794.58	4545	2962	4898.85	2754.89
RB1	573.357	568.126	716.749	1110.09	796.324	733.521	730.57	1034.14	440.106	866.304	564.61	1218.41	1043.21	1347.22	1270.77	1433.15	1248.46	1072.78	1449.34	1184.94	1387.95	1281.48	1548.19	1151.26	588.462	1268.32	752.83	890.431	688.797	1219.73	968.596	634.696	771.28	536.049	1726.8	1501.19	1117.34	753.672	1441.28	857.025	592.666	574.757	729.809	1079.44	988.095	778.867	893.002	813.577	942.553
RCHY1	467.714	724.545	486.207	584.216	829.111	581.978	607.015	472.502	395.251	415.761	641.437	646.074	591.801	586.892	573.786	700.229	701.821	445.729	747.915	823.283	649.395	642.857	752.378	512.225	643.956	488.171	574.843	572.038	394.191	530.83	533.423	501.448	638.68	372.823	832.711	572.881	609.565	478.638	452.908	659.819	520.641	664.725	379.43	505.958	563.191	546.806	447.274	500.567	485.532
RELA	2745.78	1999.51	1899.51	2139.46	3631.89	1829.13	2040.26	2214.59	2762.01	4933.7	3603.14	2017.14	3740.21	2088.96	2318.56	1880.35	1924.31	2603.58	2201.33	1719.03	2253.55	2068.4	1880.15	2892.25	2251.65	2507.63	2993.08	1694.77	1829.28	3176.01	3758.19	2264.89	1743.49	2208.37	1866.09	1741.43	1643.73	1912.55	2389.49	2439.88	2607.73	2075.73	1971.85	1616.68	1943.48	2490.26	2596.61	2153.81	2517.02
REL	33.9732	25.578	44.335	73.9261	43.2191	86.5963	42.2479	123.697	18.9974	45.6522	31.8218	41.4508	87.7015	70.9226	41.4508	153.645	65.8749	22.0336	88.2296	121.446	190.952	77.4818	89.7273	67.9652	46.1538	21.1848	89.9371	75.7737	17.783	28.5874	83.8941	25.7483	16.2131	17.8065	62.6819	161.084	49.5099	37.3832	50.6567	50.671	50.212	56.9579	46.243	46.6733	152.214	83.1362	66.1769	24.221	102.979
RHOA	6944.5	9212	10090.6	9120.88	9539.99	6514.25	7878.44	8487.28	8606.86	7163.04	6317.99	8354.32	10139.8	7859.71	8480.52	6936.91	7419.16	8828.97	12575.8	13151.4	7601.26	7173.73	8081.17	7260.26	5842.86	7155.39	7267.92	7543.93	7435.68	10254.5	9345.45	7043.77	8283.15	8865.77	9323.93	8600.6	6940.49	7158.21	9225.14	11498.5	7288.56	8356.63	8429.27	8113.21	7604.54	10674.8	9549.04	9910.12	7475.32
RHOB	8376.5	2582.39	15985.7	10190.2	6116.24	2605.1	20123.6	24901.2	7500.26	5095.65	1995.23	6852.53	3806.91	3018.39	5921.32	4577.31	1899.6	10881.3	3416.52	5513.71	28043.7	3559.32	6506.34	7766.27	7312.64	6599.52	27175.5	9497.33	7844.69	2288.68	4960.07	3329.9	8609.15	11275.2	6989.9	5527.68	4027.73	4966.62	9904.69	12845.8	14770.2	10521.7	5519.51	9857.99	7005.73	8645.49	5816.62	10944.8	16840.9
RHOXF1	0.4654	0	0	0	0.4968	0	0.7971	1.6148	2.6385	0	0.4546	0.3986	0.3685	0	0.3838	1.3076	3.1671	0.3612	0.3393	0.3355	0.263	0.3027	0.9512	0	7.1429	0.9211	0	0.3557	0	2.8027	0	0	2.3162	1.8548	0	0.308	0	7.3431	0	0.2739	1.2347	2.589	0.5929	0.993	0	0.2253	0	3.1053	0.4255
RLN1	5356.6	301.033	876.355	7598	1112.77	31.8369	9539.26	15475	32.19	23.3696	881.464	137.106	0	60.3926	521.973	7266.43	5992.72	6923.24	65.1542	29.8583	36.2967	1737.89	8.8776	72.1094	2624.18	141.385	119.497	4998.93	5560.76	423.767	86.5859	4040.23	7492.18	838.388	434.42	4059.14	2495.3	2043.39	321.951	416.872	3093.39	5.8252	154.143	175.77	910.045	6.0831	369.509	542.178	106.808
RNF14	1583.71	857.846	1244.83	1366.63	1366.62	2020.58	1656.04	1741.12	1288.65	2157.07	1384.25	2275.01	682.451	1470.79	1670.31	1261.85	1308	1468.67	712.284	1453.33	1304.84	1527.24	1299.3	1630.75	1298.35	1527.15	1008.18	1388.83	1431.54	1935.54	1041.72	1411.01	1597.57	1589.97	2028.02	1595.75	1521.34	1126.17	1557.22	2057.79	1289.87	1231.07	1351.72	1313.31	1363.45	2339.75	1264.57	1258.87	1060.43
RNF4	1304.94	1323.66	1190.64	1229.17	1379.04	1262.86	1477.88	1701.72	1458.05	1451.63	1329.24	1962.53	1221.93	1236.34	1663.4	1546.26	1166.11	1724.4	1948.86	1388.91	1454.76	1640.13	1415.35	1419.39	1145.6	1151.35	1569.81	1336.54	1260.82	1772.98	1627.19	1796.27	1248.99	1334.74	1247.98	1324.4	1468.66	1106.14	1314.45	1648.59	1404.29	1305.5	1408.04	1162.36	1424.66	1780.78	1424.48	1397.37	1209.36
RNF6	977.312	700.935	857.143	693.706	827.62	1401.67	1041.45	1092.28	705.541	762.5	945.107	864.886	1206.45	716.659	1047.78	653.808	654.315	882.427	1077.42	923.593	1066.81	871.368	929.613	1326.56	667.033	1204.31	815.723	891.142	798.459	885.09	699.417	790.473	871.453	538.646	1078.22	1102.64	871.769	729.639	774.109	1095.59	905.051	743.689	646.216	722.443	713.138	1021.74	746.743	807.988	796.596
ROCK1	1360.33	906.05	1410.84	1797.8	1137.61	1865.22	1272.62	3674.41	509.762	1151.09	1507.44	2089.68	2661.63	1219	1616.96	1992.15	723.99	734.694	1126.28	2656.04	1940.29	1548.73	1435.64	1314.55	1115.38	1150.89	1009.43	1711.49	1264.97	815.583	1126.96	1131.96	968.153	857.678	2153.38	2117.5	1170.02	1100.13	2031.52	1709.12	1114.95	1132.04	1360.61	1073.49	1526.03	1637.49	1387.4	1020.39	1356.17
ROCK2	538.453	437.777	836.946	867.932	616.99	1499.73	550.418	1383.27	313.984	1097.83	513.695	616.58	909.074	1058.88	579.159	1374.31	620.744	371.681	1186.01	1569.07	1366.65	1018.77	785.035	963.531	771.978	377.181	556.604	1479.54	790.753	522.982	718.259	568.394	558.772	387.662	1286.28	1766.07	887.217	613.485	926.829	1019.45	640.821	476.375	905.888	1057.1	1438.26	1071.31	938.064	436.599	858.298
RPS6KA3	3215.36	892.769	1558.13	1950.45	1012.92	3440.93	2004.78	2130.3	1134.56	1747.28	2941.7	2467.92	799.631	3214.13	1297.26	3747.63	2590.02	2628.86	2438.53	4315.02	2287.48	3547.22	2146.48	2622.05	3933.52	3316.34	1776.73	3837.42	1580.32	2423.21	2324.36	2295.78	2935.73	2425.76	3263.37	2261.95	3772.65	1628.84	2258.91	1963.85	2189.98	1656.96	2322.82	2442.4	2529.34	1544.44	1806.86	1327.19	1791.49
RUNX2	582.664	83.6203	245.32	177.822	123.199	81.0779	177.76	339.117	273.879	98.913	44.0959	85.6915	169.139	228.873	105.93	145.799	55.1069	171.212	155.42	251.614	191.478	91.1017	270.133	195.607	87.3626	268.955	227.673	191.391	99.5851	144.058	328.847	153.524	64.8523	90.5162	199.798	188.188	113.675	232.31	94.9343	156.122	249.414	175.405	110.865	63.5551	317.058	94.4013	237.67	148.431	389.787
RWDD1	727.865	472.209	638.916	675.724	1091.9	986.518	864.488	710.207	1237.99	844.565	1113.31	1351.93	781.575	861.601	591.057	700.556	820.903	869.424	727.215	1019.88	651.762	710.351	763.792	501.45	821.429	884.695	788.05	789.755	1229.99	1116.03	771.646	829.417	1259.41	1289.48	1247.98	616.617	993.762	590.12	828.518	1025.47	769.232	1132.04	1049.36	994.042	837.5	496.114	678.249	717.936	747.66
RXRA	1771.73	1076.24	1718.23	2651.75	2194.73	3347.12	2177.76	2480.4	1310.82	3804.35	2055.69	5532.48	2514.97	1348.77	1555.56	1853.22	2420.27	934.441	1554.54	1137.63	1534.46	2112.59	1285.99	2553.67	2782.97	2199.99	2388.05	1776.95	1393.01	2850.9	1187.53	2174.77	1423.86	1392.24	2444.59	2006.93	1880.19	1891.86	2551.97	2294.17	1397.7	1612.94	1709.21	2041.71	2480.11	1461.98	2455.76	1481.83	2271.06
RXRB	1129.03	1393.51	1079.8	1055.34	1203.68	1065.47	1125.15	1053.85	1181.53	1120.11	1207.41	1016.74	1207.19	1114.01	906.928	1084.67	1193.35	1000.54	1248.79	892.057	1043.4	1139.23	1081.48	1149.61	1476.92	1068.91	1177.36	1004.62	1228.81	1237.67	1044.86	1193.76	1211.93	1070.24	963.734	936.013	1121.7	1395.19	1082.18	1179.68	1054.86	1295.15	1123.47	1143.5	992.629	1190.04	1309.38	1150.19	1334.47
RXRG	1.3962	0.4919	26.1084	13.5864	3.9742	1.698	231.566	1.2919	2.1108	3.2609	0	0.3986	0	0.9291	1.5352	4.2498	0.6334	1.806	1.3574	4.3613	1.5781	2.4213	0.3171	2.0721	2.7473	2.3027	1.2579	15.6528	7.706	0.5605	0.8973	1.2874	1.1581	19.6613	3.4823	1.848	0.7922	2.6702	31.5197	0.8217	1.2347	0	4.7429	66.0377	4.8579	13.5181	3.8625	3.7263	8.9362
SAFB2	2206.86	2172.16	2200	1900.5	2368.11	1829.13	1656.44	1816.37	2203.17	1905.98	2131.61	3073.34	1992.81	1557.82	1819.61	2025.83	2648.3	1912.59	1614.6	1277.87	2096.27	1641.95	2085.92	1900.12	2456.59	2909.22	2252.83	1773.03	1865.44	2452.91	2513.23	2293.53	2115.23	2031.05	1508.72	1782.4	1555.8	2686.92	1807.5	1994.52	1960.33	2088.67	2167.49	2133.07	1685.04	1733.47	1614.25	1994.82	1931.06
SCGB2A1	136.824	30.4968	16.2562	44.7552	28.8127	10.1878	55.002	43.9237	13.7203	9.7826	21.8207	4.3842	0.3685	3.4068	5.7571	46.4204	82.977	35.7594	5.4295	14.4259	36.2967	21.1864	13.9505	36.0547	42.3077	28.5534	49.6855	25.9694	13.0409	14.0135	18.3939	30.898	24.8987	37.4678	57.0231	7.392	4.3569	46.0614	15.7598	296.083	23.4597	47.2492	17.1929	9.9305	38.2154	18.7	36.8222	114.894	54.8936
SCGB2A2	0.4654	8.8539	0	0	0	0	0.7971	0	1.0554	2.1739	0	0	0	0	0	0.3269	0	0	0	0	0	0	0	0	0	0	0	0.3557	0	0	0	0.3219	0	1.8548	0	0	0	0	0.3752	0.8217	0	0	0	1.4896	0.9716	3.1542	0.2575	0.6211	0
SENP1	288.075	268.569	303.448	296.903	304.024	425.765	231.566	286.15	232.718	259.239	265.939	279.793	612.068	256.746	259.067	322.654	251.465	238.396	536.504	437.373	366.649	307.203	452.758	258.599	372.527	268.494	218.868	311.633	273.859	332.399	310.005	217.895	217.139	233.71	360.421	378.532	332.706	255.674	356.848	301.561	222.25	212.945	292.279	239.325	333.899	305.509	346.849	242.831	370.213
SFRP1	1999.77	946.876	2489.16	845.155	1720.32	300.964	387.007	2492.67	1318.21	2796.2	240.482	289.358	1.1055	465.797	993.283	1906.83	943.151	1276.14	848.361	2051.5	2295.11	1516.95	1844.01	823.456	951.099	613.438	1411.32	1765.56	1417.31	832.96	1436.52	868.684	314.418	1620.39	2052.4	3841.07	1047.63	2389.19	1374.86	1086.55	1786.64	928.155	4081.83	1258.69	3865.26	1805.56	3002.68	1257.01	3382.13
SIN3A	1623.27	1371.86	1444.83	2144.66	1482.86	1941.2	1506.97	1484.68	1295.51	1552.72	1702.01	1071.34	1427.91	1497.12	1401.65	2259.24	1961.05	1383.42	2591.91	2465.82	2245.13	1782.08	2146.48	1575.22	1564.84	1492.61	1686.79	1628.6	1653.23	1160.87	1799.46	1593.5	1156.34	1165.21	1995.81	2032.19	1450.04	1753	1658.54	1685.57	1531.88	1144.98	1635.7	1307.85	2008.58	2040.55	2049.17	1468.17	1686.81
SIRT1	646.888	674.865	734.975	864.735	706.408	941.947	546.831	843.593	540.369	869.022	748.721	1053.81	668.816	517.828	604.107	721.804	896.912	784.179	1192.8	1159.78	837.717	694.007	895.371	698.715	884.066	542.515	769.811	694.415	697.095	757.287	650.067	562.279	656.051	529.371	943.275	864.865	565.205	600.801	553.846	395.234	598.428	522.977	610.644	565.541	703.099	625.211	646.062	557.083	767.234
SMAD3	1005.7	443.679	863.547	958.242	1027.82	740.313	793.543	1039.31	1103.96	1188.59	438.232	593.463	335.698	636.755	622.145	1064.73	1026.13	810.186	638.646	1499.29	1370.86	762.106	926.443	918.359	918.681	837.72	761.635	874.422	1236.51	1255.61	1968.6	722.24	580.197	769.017	1261.04	1063.22	750.173	1197.6	954.972	506.163	789.399	746.278	1154.89	873.386	1216.09	911.119	1627.64	944.619	1607.23
SMAD4	1989.19	2040.02	2563.09	2768.45	2453.15	2806.87	2641.69	2325.3	1194.72	2309.83	2686.21	2561.65	2343.12	3073.73	1643.25	3808.69	2041.49	2197.24	1602.85	1692.13	3744.93	3486.59	4286.64	2926.68	3003.49	2180.7	2512.58	3361.23	2151.25	2188.5	2423.46	2428.86	3577.44	3294.05	4743.57	3140.67	2461.52	2999.39	1512.57	2383.04	2168.09	1936.57	2498.44	2516.89	3265.54	2182.19	3020.32	1959.45	2334.89
SMARCA2	4166.14	1570.09	3068.97	3687.51	2160.95	4572.2	3143.48	2913.5	1537.73	1998.37	2119.79	4663.61	124.551	3590.42	1686.43	4030.73	4159.62	1689.36	5002.96	4874.95	3436.88	3624.39	5034.88	3491.5	2563.19	5070.99	3487.42	3589.83	3022.53	3755.61	2974.43	2392.98	2458.02	2647.6	4236.69	3662.43	4695.91	2817.09	2973.73	2350.86	2180.11	2897.09	3071.01	3822.24	3494.44	4086.52	4030.35	2772.99	2977.02
SMARCA4	3135.31	3893.75	3876.35	4897.1	3200.7	4009.75	3549.62	3616.28	3920.84	3438.59	4334.58	6238.74	4500.41	4921.84	3405.1	3656.1	5643.07	3433.63	5687.08	3523.27	4419.78	3111.08	3638.87	4348.11	4362.64	4338.27	3657.86	3751.33	3436.87	3892.94	3932.26	3871.58	2961.2	3401.41	2384.52	3230.31	3406.67	3762.35	4363.6	3326.49	3506.2	3617.48	3730.27	3467.73	3459.79	3345.95	3646.42	4284.63	3296.17
SMARCC1	1733.57	5109.2	3723.15	5654.35	3574.27	5237.8	3602.63	3679.25	3362.01	3231.52	4704.17	3022.32	6175.22	5520.5	4123.2	5209.55	5706.41	3369.33	6908.38	5019.88	6147.29	5406.48	4733.35	3612.52	3033.52	3124.29	3870.44	4155.82	3417.9	3173.77	3563.03	3913.74	3795.02	2992.97	4399.05	4594.75	4457.47	3292.39	4787.99	4234.73	3549.41	3352.1	3966.22	3278.05	4395.42	5879.69	4137.47	3063.03	3167.23
SMARCE1	2884.93	2459.91	2650.25	3022.98	2247.39	3266.89	2221.6	2792.06	2419.53	2514.13	2745.77	3178.56	3521.7	2819.87	2773.75	2319.39	3276.64	2459.82	3982.21	4218.07	2258.81	2497.58	3072.61	2254.45	2288.46	3441.15	2365.41	2259.69	3436.28	2819.51	2540.6	2241.39	1964.1	2691	2845.93	2457.23	2596.69	2649.53	2764.73	3447.55	2346.38	2186.41	2768.65	2314.3	2159.82	2492.73	2795.39	2411.54	2510.21
SNURF	275.611	53.2612	109.601	155.624	12.772	21.0293	278.099	179.121	91.4723	16.1902	122.509	114.277	126.946	147.051	29.6718	119.127	146.85	20.7369	32.6212	180.076	115.671	99.3069	216.278	434.712	233.357	113.233	265.151	134.119	101.357	182.763	146.761	139.018	110.359	61.3989	231.74	173.888	115.679	173.491	127.182	310.142	104.651	49.8123	85.1997	222.642	123.18	215.557	125.007	183.8	82.834
SNW1	1269.11	1191.34	1247.29	1295.9	1234.48	1342.67	990.833	1008.31	1410.55	697.283	1286.51	1160.22	1799.36	1215.9	1226.25	1121.94	1330.17	1195.59	1371.97	1329.53	1279.85	1092.01	1449.27	1254.04	1006.04	1381.16	1054.72	1095.7	1282.16	1292.6	1569.31	1169.62	1149.39	1201.19	1149.6	1151	1178.33	1317.09	1188.74	1262.94	1212.09	1259.55	1108.05	1266.63	1130.59	1396.42	1163.12	1419.1	1206.38
SP1	1666.55	1757.5	1836.45	2728.47	3489.82	2907.34	1957.75	2158.07	1622.69	3512.5	2564.38	2951.38	2440.53	2478.26	2033.39	3528.6	2411.4	1823.01	3086.34	2890.21	3153.6	2657.69	3224.79	2070.04	2678.57	1809.92	2167.92	2627.53	2264.37	2524.66	2411.84	1771.16	1507.24	1997.29	2983.92	3076.62	2383.21	2096.13	2363.6	2541.22	2017.54	1665.37	2203.06	1892.75	3037.48	2445.87	3086.11	1832.72	2515.32
SPDEF	14209.2	18644.4	18417.2	13980	15382.5	16049.6	19505.4	14364.7	13601.1	17937	26629.8	15219.2	8972.82	24041.8	19841.9	13841.5	15725.1	17364.3	6223.58	5524.45	14427.9	22415.3	8637.29	10072.9	40464.3	14731.3	16988.7	19302.7	13963.8	19211.3	10102.7	24315.4	28063.7	26618.4	11405.5	12664.4	14858.9	14883.2	11705.8	11668.3	14184.1	20472.5	21896.1	18027.8	11156.3	18732.2	14086.7	14364.9	7474.04
SRC	2209.66	1737.83	1345.32	2544.26	2730.75	1993.84	1899.56	2022.43	1510.82	4096.2	1145.13	2024.31	1280.52	1384.69	1864.13	1098.4	2819.95	4174.1	3082.27	1287.6	1366.91	1678.87	2309.77	2665.98	3189.01	1470.96	1861.64	1548.2	1774.16	2586.32	4839.84	2009.33	975.68	1371.47	1897	1842.77	1936.03	4152.2	1946.72	1921.94	2776.89	1589.64	1768.5	1149.95	2279	1576.66	2089.85	2831.99	2709.79
SRF	1708.44	1068.37	2427.59	1512.89	1762.54	979.302	1617.78	2200.38	1983.64	1503.26	879.645	1667.2	1637.59	1296.43	1189.02	1946.06	1109.74	1678.89	1717.76	1051.08	2305.37	1764.53	1353.52	3738.09	1393.96	1262.34	3221.38	1654.93	2145.23	1142.38	2081.65	1336.02	1397.22	2066.29	2184.72	1611.77	1241.71	1777.7	2339.96	1306.49	2871.14	1602.59	2983.27	1560.08	2045.17	1532.72	2149.33	1833.34	2779.15
SRY	0	0	0	0	0	0	0	0.6459	0	0.5435	0	0	0	0.3097	0	0	0	0	0	0	0	0.3027	0.3171	0.4144	0	0	0.6289	0	0	0.5605	0.8973	0.6437	0	0	0.8706	0.308	1.1882	0	0	0	0	0.6472	0.5929	0	0.3239	0.2253	0.7725	0	0.4255
STAT3	5669.34	2953.76	4910.34	6150.65	4671.63	2681.09	6044.64	8038.03	5403.69	4785.87	2998.52	3169.39	3660.99	5363.17	5797.35	6003.27	4489.63	8089.94	6703.75	9961.25	6945.56	6314.16	8114.77	7164.11	3106.04	5513.57	5104.4	5064.39	3994.67	3085.76	10912.1	4922.43	3626.52	4285.42	6621.21	7480.1	4476.09	4922.56	6963.23	16074.2	6322.19	4201.94	4845.43	4915.09	8112.68	6906.61	7756.35	5789.44	6120.43
STUB1	2816.67	2169.8	2958.39	2179.23	3215.94	1634.72	2483.72	1590.72	3079.95	1841.6	2268.07	3319.42	3209.08	2329.49	2608.69	1373.63	2631.14	3004.38	1931.04	1358.12	1580.69	1790.96	1425.55	2311.65	2474.38	2714.47	2702.76	2063.71	2273.63	2631.93	2036.48	3108.95	2974.91	3259.55	1432.17	1614.05	2137.01	2511.45	2459.13	2190.64	2509.95	3233.79	2496.74	2704.01	1558.54	1898.5	2029.19	3279.08	2075.08
SUMO1	1939.27	1553.86	2136.95	1935.26	1967.71	1552.37	2192.51	1467.89	2164.12	1705.43	1920.67	1927.86	1784.25	1671.79	2284.78	1402.75	1088.84	2723.5	2192.17	2582.57	1482.11	1785.41	2250.79	1983.01	2239.56	2371.77	1763.52	1635.01	2656.19	2165.36	2026.92	1795.62	2406.49	2663.55	2677.04	1599.14	2069.12	1939.92	2046.9	2661.19	2155	2270.55	1871.06	1869.41	1273.09	1605.05	1260.71	2422.72	1657.45
SVIL	1218.1	847.24	3902.24	1635.29	2838.82	1550.91	1142.51	2974.06	1678.71	2606.68	1445.5	1819.55	1100.35	961.611	1145.12	3598.42	1329.63	2126.68	1931.82	2330.27	3382.71	2413.95	1730.99	1891.44	1781.52	1296.94	1852.47	4300.79	5170.76	1810.77	2177.96	1465.56	1528.58	2601.78	5173.27	3881.64	1379.46	3096.86	5041.01	2105.59	2367.78	1826.14	6677.84	6973.46	4105.71	3009.44	4005.81	2787.71	3170.53
TCF21	497.964	347.27	799.507	614.186	392.449	75.984	74.5317	519.979	335.62	595.109	94.5562	55.4006	1.1055	263.56	168.106	487.414	544.735	121.004	93.9984	365.009	366.649	707.93	175.333	199.337	706.044	123.885	325.157	360.37	1267.93	549.327	286.227	400.708	383.324	716.339	339.091	854.701	188.137	610.814	281.801	211.997	266.7	570.226	597.602	524.33	612.094	400.811	509.845	467.031	505.957
TCF4	948.458	533.202	1093.1	1078.92	700.944	545.471	636.509	1085.17	497.625	652.174	137.743	208.45	553.478	733.383	442.142	968.29	632.779	473.542	950.504	1391.26	1150.45	979.721	1347.81	733.112	804.945	529.62	605.031	818.926	750.445	986.547	612.831	397.811	422.119	508.226	1210.11	1531.99	646.005	989.987	720.45	644.207	586.493	1005.83	959.245	691.162	1106.63	1413.32	1204.83	619.188	1103.83
TGFB1I1	656.661	215.937	1447.78	460.739	615.996	179.56	217.617	764.466	878.628	637.5	45.0051	141.889	57.485	230.421	242.18	811.049	248.931	736.5	405.177	263.021	565.492	558.111	253.329	512.64	619.231	333.891	466.038	705.799	1628.93	1193.39	567.07	480.528	741.749	1758.39	959.816	913.837	283.592	1045.39	1513.7	491.92	651.933	612.298	2496.53	939.921	856.608	736.735	1077.11	994.924	1062.13
TGIF1	1140.66	1365.47	1173.4	1111.69	1677.1	1253.95	1808.69	1928.77	1620.05	1019.57	1201.5	982.463	2208.01	1096.67	1380.16	721.804	744.26	2169.04	587.745	1396.63	2455.81	887.712	1577.68	1573.56	1372.53	1457.14	3082.39	842.761	1624.78	1020.18	1768.51	993.241	780.544	1349.95	1066.9	933.549	706.208	1847.8	1475.05	2641.19	1965.68	1317.15	1156.07	904.171	1135.45	993.579	1327.14	1479.34	1989.36
TMF1	1194.65	1458.93	1136.95	1231.17	1053.15	1990.44	1471.1	2089.6	944.591	1451.09	1276.96	1544.84	1530.72	1484.11	1388.6	1703.5	1574.03	1265.31	2393.74	2800.3	1812.47	1632.26	1894.1	2081.23	1090.11	1515.17	1652.2	1527.57	1002.96	1197.87	1547.78	866.109	1210.19	865.468	1905.7	1911.14	1552.23	1046.73	1547.47	1633.53	1062.27	994.175	957.467	1183.71	1524.41	1675.57	1180.88	1094.29	1453.62
TMPRSS2	31068.3	64222.8	39829.6	57586	38973.7	26686.9	79831.8	75448	26820.6	78198.4	94234.3	59711	42875.4	51083.2	76203	43762.3	43946.8	41179	15976	7478.99	70819.6	40414.6	41825.3	27984.7	54468.7	63137.6	71199.4	47482	26259.6	36826.8	21454	55733.2	57680.4	32622.9	57425.3	42562.3	51438	50849.1	51069.4	45155.3	32602.4	43320.4	34593.9	56585.9	34610.2	41537.7	36287.3	27379.7	10645.1
TRIM24	2495.87	951.303	1088.18	1163.64	1378.04	1771.83	1161.42	1003.46	787.335	693.478	1168.77	1132.72	1466.61	1171.62	1010.55	1404.38	1362.47	681.235	825.286	1863.29	1400.58	1222.15	1320.86	1150.44	1548.9	2400.79	1418.87	1138.38	1004.15	1290.92	548.228	997.747	916.618	1184.87	1439.07	1106.34	1000.89	913.218	1239.77	1207.34	821.09	567.638	755.302	1691.16	1208.64	1078.07	890.427	699.304	573.192
TRIM68	1137.41	1134.28	1272.41	1839.76	959.761	881.244	2151.85	1928.12	582.586	798.37	1155.59	1206.86	605.067	2824.21	1471.89	1986.92	44.3389	1601.59	1484.97	1051.75	981.063	1980.63	2075.78	1739.74	1021.98	2221.64	2403.77	1198.86	1222.88	529.708	919.695	3826.84	2409.96	3015.97	1305.87	1384.15	1922.57	1923.9	2184.24	1319.64	1104.25	2134.63	1298.36	1965.74	1619.62	1215.95	1450.48	1233.41	547.66
UBA3	974.52	1194.29	1046.31	707.293	705.415	997.979	1041.45	831.643	966.227	625	818.275	938.621	1280.88	852.929	1134.91	883.622	744.893	668.232	1995.69	1659.31	730.931	876.816	1222.57	1043.93	912.637	911.867	910.063	780.505	749.259	865.471	895.469	745.735	921.251	766.791	1150.91	907.985	1025.05	829.773	1091.56	1354.7	989.012	728.803	731.588	933.466	773.376	847.358	754.726	952.693	963.83
UBE2I	1628.85	2004.92	1648.77	1573.63	1590.66	1534.11	1267.04	1254.73	2190.5	2445.11	1700.65	3309.29	2115.15	1348.46	1496.45	1259.89	1862.87	1745.71	1702.49	1497.27	1258.55	1039.04	1261.26	1280.15	1642.31	1663.01	1648.43	1199.57	1617.66	1626.68	1981.16	1437.4	1309.79	1502.05	1300.65	1166.71	1072.98	1610.81	1671.29	1711.86	1858.26	1350.16	1472.66	1484.11	1190.51	1224.51	1348.26	1886.13	1488.09
UBE3A	1407.27	1501.2	1617.24	1922.88	2295.08	2209.05	1927.86	2093.8	1322.83	1809.78	1836.06	3247.11	2255.18	1790.1	1759.74	2431.51	2203.52	1690.08	2403.58	2945.57	1986.05	2433.72	2396.64	1801.08	1604.38	1634.45	1599.98	1960.51	1681.03	1414.8	1733.04	1541.02	1763.17	1255.71	2593.46	2460.61	1953.85	1626.76	1817.63	1966.86	1712.96	1414.08	1613.76	1678.24	1982.67	2003.6	1556.83	1300.46	1764.26
VAV3	62.8272	16.7241	270.443	56.7433	228.018	50.09	30.291	79.7731	160.422	43.4783	28.185	26.3053	14.3713	53.5791	25.331	130.762	53.2067	176.63	86.1935	100.31	143.346	78.3898	222.257	64.6498	46.7033	124.346	140.252	56.2078	96.0285	45.9641	382.234	24.4609	34.7423	31.9033	137.117	107.492	52.2824	110.814	123.827	121.337	154.752	80.9061	199.201	29.7915	207.918	109.947	240.76	81.9788	310.638
WIPI1	750.669	542.056	609.852	163.037	992.052	608.721	818.653	790.626	1016.89	494.565	909.194	664.807	550.898	542.295	1770.87	688.787	166.588	518.692	543.969	1052.08	751.184	776.937	667.089	1111.07	584.066	725.348	808.805	916.4	320.688	876.121	482.728	1030.25	675.159	1267.97	1190.08	887.349	682.444	481.308	1197.37	617.091	595.136	847.249	696.016	943.396	587.157	621.832	616.707	750.23	296.596
XRCC5	5012.68	3859.81	4854.19	6205.39	4456.53	6771.91	4730.57	5354.49	4803.17	3730.98	6253.44	4907.93	7073.61	5936.44	5943.96	6597.25	4837.37	5845.4	6527.97	7538.04	5965.28	5915.56	5825.3	4624.53	5406.59	5743.38	4265.41	4941.3	5309.43	6170.4	5413.64	4473.45	4503.76	4907.91	6384.84	5562.18	5509.46	4720.96	6413.51	7458.23	4618.68	3689.32	4977.64	3867.92	5120.86	6030.64	4984.13	5210.62	5624.26
XRCC6	6451.66	5307.43	5820.2	6911.09	5866.37	6515.94	5823.83	6139.95	7099.74	4869.57	5049.21	4811.48	8188.67	6542.84	7194.01	5496.57	3028.35	7042.8	7690.23	7072.72	5480.27	5890.44	6053.9	6579.78	4548.35	6301.55	5320.75	5054.78	5846.47	6373.88	6804.85	5798.2	5137.81	6216.31	5764.99	5500.89	6306.37	5060.08	6233.02	5382.36	5752.98	5283.5	5979.57	5538.23	5204.1	6777.06	6309.47	4121.92	6194.89
ZBTB7A	796.742	847.516	915.271	947.053	1054.15	905.44	868.075	1021.23	898.681	949.457	1182.86	1011.16	790.419	856.026	929.572	1006.21	1036.26	631.028	1206.71	815.902	1416.62	901.634	954.661	978.036	993.956	1134.77	850.943	985.059	1190.87	923.767	798.564	805.278	749.855	922.968	867.534	995.149	969.601	1007.34	1177.49	984.936	868.832	894.498	1106.87	1122.14	855.313	1052.61	930.854	796.809	1072.34
ZMIZ1	2424.67	2659.62	2473.89	4752.85	3538	5212.76	3141.89	4045.18	2063.32	5496.74	2653.03	3167.4	1791.99	3023.66	4589.14	7499.18	3606.02	2055.99	7391.6	3041.18	3976.33	3756.36	5102.09	4891.01	3418.68	5170.47	3379.87	4491.64	5023.71	4713	1823.24	2716.12	2072.38	3872.16	2301.38	4267.04	2839.89	4685.58	4771.11	2495.48	3202.04	1696.44	2313.93	3268.62	5475.49	2810.86	6780.43	2511.53	2996.6
ZMIZ2	2111.46	4950.81	3258.62	2533.07	4368.11	3463.85	2155.84	1790.86	3887.6	2469.57	2844.87	2777.2	4173.93	2715.19	2481.29	2643.02	4726.52	2043.34	2809.09	1898.18	2430.83	1930.99	2607.8	2290.92	3601.65	2677.11	3188.68	2694.77	2510.97	3559.42	2791.39	3083.68	2222.93	2556.34	1541.36	2042.04	2149.12	3596.8	3007.13	2301.29	2655.06	3080.26	2266.5	3918.07	2237.87	1787.32	2297.14	2620.84	2986.81
ZNF318	450.96	668.962	442.365	610.989	586.19	809.93	646.871	773.832	312.401	844.022	614.615	967.318	876.647	659.363	553.445	978.097	554.869	363.735	1063.17	807.85	794.056	709.746	756.183	610.443	801.648	448.104	577.987	681.252	453.468	405.269	383.131	596.395	516.503	435.887	976.793	818.665	615.506	501.335	639.024	536.839	493.889	389.644	439.308	609.235	908.102	665.315	724.856	465.789	673.192
[truncated: 7 more columns]

## Sheet: Table S6
#GSE123619, genes in pathway analysis validation
gene	pathway	mutant 1	mutant 2	control 1	control 2	mean_mut	mean_control	FoldChange
APAF1	Signaling pathways regulated by TP53	7.2487	6.9907	4.0746	5.4227	7.1197	4.74865	1.49931
ATF3	Signaling pathways regulated by TP53	8.434	10.7747	9.3003	14.8133	9.60435	12.0568	0.796592
BAX	Signaling pathways regulated by TP53	20.9839	19.7602	12.0644	16.4413	20.3721	14.2528	1.42933
BCL6	Signaling pathways regulated by TP53	26.917	27.5647	12.2835	18.0758	27.2409	15.1797	1.79456
BTG2	Signaling pathways regulated by TP53	4.8906	4.3439	18.3821	12.5199	4.61725	15.451	0.298832
CCND1	Signaling pathways regulated by TP53	1499.7	1310.54	1009.77	807.285	1405.12	908.53	1.54658
CCNG1	Signaling pathways regulated by TP53	51.234	60.0508	71.6297	75.7659	55.6424	73.6978	0.755008
CDC25C	Signaling pathways regulated by TP53	6.7569	10.0323	4.3003	6.8046	8.3946	5.55245	1.51187
CDK2	Signaling pathways regulated by TP53	101.197	114.321	75.8306	89.7617	107.759	82.7962	1.3015
CREBBP	Signaling pathways regulated by TP53	8.5434	8.6283	11.2932	11.1029	8.58585	11.1981	0.766727
CTSD	Signaling pathways regulated by TP53	43.961	34.0406	31.683	28.0071	39.0008	29.8451	1.30678
DDIT4	Signaling pathways regulated by TP53	25.617	30.7021	11.1069	9.9833	28.1596	10.5451	2.67039
DGCR8	Signaling pathways regulated by TP53	15.5265	17.0783	12.2263	12.8459	16.3024	12.5361	1.30044
DKK1	Signaling pathways regulated by TP53	18.524	15.4719	10.7413	5.5583	16.9979	8.1498	2.08569
DUSP1	Signaling pathways regulated by TP53	7.9855	5.5278	7.6308	12.9063	6.75665	10.2685	0.657995
E2F1	Signaling pathways regulated by TP53	47.4715	44.9741	24.2457	30.9163	46.2228	27.581	1.67589
E2F2	Signaling pathways regulated by TP53	15.8342	21.9378	10.0379	14.5422	18.886	12.2901	1.53669
E2F3	Signaling pathways regulated by TP53	6.7744	9.9923	11.2304	12.0187	8.38335	11.6245	0.721176
EGFR	Signaling pathways regulated by TP53	4.4701	3.9499	8.1231	8.1424	4.21	8.13275	0.51766
EGR1	Signaling pathways regulated by TP53	8.337	15.0167	4.1114	69.4007	11.6768	36.7561	0.317685
ERCC5	Signaling pathways regulated by TP53	10.8901	11.4283	14.8459	15.2676	11.1592	15.0568	0.741143
FANCC	Signaling pathways regulated by TP53	9.8275	11.1044	6.7622	7.9412	10.4659	7.3517	1.42361
FOXA1	Signaling pathways regulated by TP53	276.566	310.04	122.412	154.422	293.303	138.417	2.11898
GADD45A	Signaling pathways regulated by TP53	5.2869	5.6643	7.703	7.284	5.4756	7.4935	0.730713
HGF	Signaling pathways regulated by TP53	0.1669	0.3543	32.2197	36.3902	0.2606	34.305	0.00759657
HRAS	Signaling pathways regulated by TP53	30.3216	34.7812	21.8235	25.9797	32.5514	23.9016	1.36189
IGFBP3	Signaling pathways regulated by TP53	8.2723	1.3344	21.9782	10.0166	4.80335	15.9974	0.300258
ISG15	Signaling pathways regulated by TP53	16.7925	13.3836	18.0838	21.04	15.088	19.5619	0.771298
JMY	Signaling pathways regulated by TP53	5.1811	4.2667	7.1342	7.1435	4.7239	7.13885	0.661717
JUN	Signaling pathways regulated by TP53	7.6652	6.9476	6.882	29.0199	7.3064	17.9509	0.40702
MAP4K4	Signaling pathways regulated by TP53	10.8053	11.9862	23.1674	26.984	11.3957	25.0757	0.454454
MAPK1	Signaling pathways regulated by TP53	24.2809	24.8376	18.2341	18.6295	24.5592	18.4318	1.33244
MAPK3	Signaling pathways regulated by TP53	11.1134	10.4671	5.5362	8.7524	10.7903	7.1443	1.51033
MET	Signaling pathways regulated by TP53	2.8742	4.5317	14.1099	6.5517	3.70295	10.3308	0.358438
NDRG1	Signaling pathways regulated by TP53	9.9027	13.1189	15.5738	25.9779	11.5108	20.7759	0.554047
NFYC	Signaling pathways regulated by TP53	15.7668	16.2064	10.093	11.5135	15.9866	10.8033	1.4798
PERP	Signaling pathways regulated by TP53	106.719	94.6348	63.7671	62.2868	100.677	63.0269	1.59736
PRMT1	Signaling pathways regulated by TP53	80.4827	104.711	105.431	131.481	92.5968	118.456	0.781699
RABGGTA	Signaling pathways regulated by TP53	11.1765	11.8627	9.3135	8.3253	11.5196	8.8194	1.30617
RABGGTB	Signaling pathways regulated by TP53	42.1021	42.2144	75.9854	65.7345	42.1582	70.8599	0.594952
RNF144B	Signaling pathways regulated by TP53	16.7323	15.9646	22.6587	18.502	16.3484	20.5803	0.794372
RPS27L	Signaling pathways regulated by TP53	11.5733	9.755	16.5763	11.3898	10.6641	13.983	0.762648
SAT1	Signaling pathways regulated by TP53	32.8241	30.5779	21.3599	8.3045	31.701	14.8322	2.13731
SESN1	Signaling pathways regulated by TP53	4.6112	3.8594	6.2073	5.9647	4.2353	6.086	0.695909
SOS1	Signaling pathways regulated by TP53	10.7613	9.8891	13.3857	12.5395	10.3252	12.9626	0.796538
THBS1	Signaling pathways regulated by TP53	0.626	1.1608	14.5797	21.7744	0.8934	18.1771	0.0491499
TMEM219	Signaling pathways regulated by TP53	7.1669	8.0713	7.177	12.4359	7.6191	9.80645	0.776948
TNFRSF10B	Signaling pathways regulated by TP53	34.6611	31.0897	26.5257	21.1786	32.8754	23.8522	1.3783
TNFRSF10D	Signaling pathways regulated by TP53	4.8493	5.1017	10.2138	5.7582	4.9755	7.986	0.623028
TP53BP2	Signaling pathways regulated by TP53	9.9599	9.5928	13.1856	12.6294	9.77635	12.9075	0.757416
TP53INP1	Signaling pathways regulated by TP53	5.7346	4.5758	17.6211	14.9133	5.1552	16.2672	0.316908
TRAF4	Signaling pathways regulated by TP53	40.3174	52.4884	23.1402	24.6641	46.4029	23.9021	1.94137
TSC2	Signaling pathways regulated by TP53	13.1515	11.7767	7	8.1799	12.4641	7.58995	1.64218
ULK1	Signaling pathways regulated by TP53	9.762	8.5759	5.1424	6.2903	9.16895	5.71635	1.60399
VDR	Signaling pathways regulated by TP53	5.9592	8.0415	4.825	3.8213	7.00035	4.32315	1.61927
XPC	Signaling pathways regulated by TP53	12.511	11.506	15.2812	17.0001	12.0085	16.1407	0.743991
CCND1	Hippo signaling pathway	1499.7	1310.54	1009.77	807.285	1405.12	908.53	1.54658
CD44	Hippo signaling pathway	4.0004	5.9462	48.0672	22.8939	4.9733	35.4806	0.14017
CDH1	Hippo signaling pathway	62.6992	61.6916	91.1794	90.1366	62.1954	90.658	0.686044
CDH17	Hippo signaling pathway	0.4164	0.9974	9.4627	13.7182	0.7069	11.5905	0.0609899
CDH24	Hippo signaling pathway	7.194	6.9048	3.9143	5.8466	7.0494	4.88045	1.44442
EGFR	Hippo signaling pathway	4.4701	3.9499	8.1231	8.1424	4.21	8.13275	0.51766
FGFR3	Hippo signaling pathway	17.9948	18.6874	8.8886	9.786	18.3411	9.3373	1.96428
FOXM1	Hippo signaling pathway	47.9853	68.175	30.9624	53.3632	58.0802	42.1628	1.37752
HRAS	Hippo signaling pathway	30.3216	34.7812	21.8235	25.9797	32.5514	23.9016	1.36189
IGF1R	Hippo signaling pathway	9.7835	6.6365	3.5445	4.5426	8.21	4.04355	2.03039
ITGA1	Hippo signaling pathway	3.4218	7.7622	5.269	10.0713	5.592	7.67015	0.72906
ITGA2	Hippo signaling pathway	3.054	5.5944	7.0277	8.5696	4.3242	7.79865	0.554481
MET	Hippo signaling pathway	2.8742	4.5317	14.1099	6.5517	3.70295	10.3308	0.358438
MYC	Hippo signaling pathway	44.4595	53.6034	64.1727	70.3324	49.0314	67.2526	0.729065
PAK1	Hippo signaling pathway	9.3268	9.7669	13.9789	15.901	9.54685	14.9399	0.639015
PAK4	Hippo signaling pathway	30.3608	36.5963	18.6297	30.163	33.4785	24.3963	1.37228
PAK6	Hippo signaling pathway	7.2711	7.6915	4.5018	5.7104	7.4813	5.1061	1.46517
PPP1CA	Hippo signaling pathway	84.2282	100.88	59.1012	81.1347	92.5541	70.1179	1.31998
PRKAR2B	Hippo signaling pathway	18.6339	19.9595	10.8032	17.6269	19.2967	14.215	1.35748
TEAD1	Hippo signaling pathway	12.5763	12.3491	9.888	9.2409	12.4627	9.56445	1.30302
VGLL4	Hippo signaling pathway	7.3662	6.8756	11.5919	8.273	7.1209	9.93245	0.716933
CCND1	Wnt signaling related pathway	1499.7	1310.54	1009.77	807.285	1405.12	908.53	1.54658
CREBBP	Wnt signaling related pathway	8.5434	8.6283	11.2932	11.1029	8.58585	11.1981	0.766727
DKK1	Wnt signaling related pathway	18.524	15.4719	10.7413	5.5583	16.9979	8.1498	2.08569
KREMEN2	Wnt signaling related pathway	5.9584	10.4367	4.6959	6.0717	8.19755	5.3838	1.52263
MYC	Wnt signaling related pathway	44.4595	53.6034	64.1727	70.3324	49.0314	67.2526	0.729065
PROC	Wnt signaling related pathway	12.3587	11.4761	0.3597	0.2474	11.9174	0.30355	39.2601
TAB1	Wnt signaling related pathway	7.7009	6.6751	5.4368	5.3069	7.188	5.37185	1.33809
EGFR	GPCR signaling related pathways	4.4701	3.9499	8.1231	8.1424	4.21	8.13275	0.51766
FOS	GPCR signaling related pathways	1.6359	2.4152	2.5154	33.1655	2.02555	17.8405	0.113537
HRAS	GPCR signaling related pathways	30.3216	34.7812	21.8235	25.9797	32.5514	23.9016	1.36189
JUN	GPCR signaling related pathways	7.6652	6.9476	6.882	29.0199	7.3064	17.9509	0.40702
MAPK1	GPCR signaling related pathways	24.2809	24.8376	18.2341	18.6295	24.5592	18.4318	1.33244
MAPK3	GPCR signaling related pathways	11.1134	10.4671	5.5362	8.7524	10.7903	7.1443	1.51033
MYC	GPCR signaling related pathways	44.4595	53.6034	64.1727	70.3324	49.0314	67.2526	0.729065
NFKBIA	GPCR signaling related pathways	13.9292	13.0896	16.2175	18.4524	13.5094	17.3349	0.779316
RPS6KA1	GPCR signaling related pathways	14.2147	14.8874	11.8769	8.8176	14.5511	10.3472	1.40627
SOS1	GPCR signaling related pathways	10.7613	9.8891	13.3857	12.5395	10.3252	12.9626	0.796538
APP	Notch signaling pathway	30.1499	23.8199	56.5232	44.3338	26.9849	50.4285	0.535112
HES1	Notch signaling pathway	16.2318	16.6337	18.7727	39.9318	16.4327	29.3523	0.559846
JAK2	Notch signaling pathway	7.8051	7.339	5.4274	4.9604	7.57205	5.1939	1.45787
KAT2B	Notch signaling pathway	9.1644	8.2962	6.5311	6.2249	8.7303	6.378	1.36881
LEF1	Notch signaling pathway	6.1493	5.091	11.9285	10.2774	5.62015	11.1029	0.506185
MAGEA1	Notch signaling pathway	50.2378	58.0147	44.8654	36.0181	54.1262	40.4417	1.33838
MAPK1	Notch signaling pathway	24.2809	24.8376	18.2341	18.6295	24.5592	18.4318	1.33244
MAPK3	Notch signaling pathway	11.1134	10.4671	5.5362	8.7524	10.7903	7.1443	1.51033
PIK3R1	Notch signaling pathway	6.3076	5.7655	8.1324	9.2047	6.03655	8.66855	0.696374
SKP2	Notch signaling pathway	14.2706	18.7089	19.6846	25.8888	16.4898	22.7867	0.723657
SRC	Notch signaling pathway	4.797	5.8146	8.1096	8.5374	5.3058	8.3235	0.637448
BAD	ERBB2 & ERBB4 signaling pathways	18.5537	15.7248	11.7172	13.6652	17.1393	12.6912	1.35048
CAMK2D	ERBB2 & ERBB4 signaling pathways	15.742	13.4222	30.6057	21.6492	14.5821	26.1274	0.558114
CCND1	ERBB2 & ERBB4 signaling pathways	1499.7	1310.54	1009.77	807.285	1405.12	908.53	1.54658
CRKL	ERBB2 & ERBB4 signaling pathways	24.3019	30.5456	20.8644	21.0568	27.4237	20.9606	1.30835
EGFR	ERBB2 & ERBB4 signaling pathways	4.4701	3.9499	8.1231	8.1424	4.21	8.13275	0.51766
ERBB2	ERBB2 & ERBB4 signaling pathways	10.8294	8.5158	5.7619	5.6472	9.6726	5.70455	1.69559
JAK2	ERBB2 & ERBB4 signaling pathways	7.8051	7.339	5.4274	4.9604	7.57205	5.1939	1.45787
MAPK1	ERBB2 & ERBB4 signaling pathways	24.2809	24.8376	18.2341	18.6295	24.5592	18.4318	1.33244
MAPK3	ERBB2 & ERBB4 signaling pathways	11.1134	10.4671	5.5362	8.7524	10.7903	7.1443	1.51033
MAPK8	ERBB2 & ERBB4 signaling pathways	8.381	9.7181	11.6516	11.452	9.04955	11.5518	0.783389
MTOR	ERBB2 & ERBB4 signaling pathways	21.5109	20.3225	15.1903	14.7356	20.9167	14.9629	1.3979
MYC	ERBB2 & ERBB4 signaling pathways	44.4595	53.6034	64.1727	70.3324	49.0314	67.2526	0.729065
PAK1	ERBB2 & ERBB4 signaling pathways	9.3268	9.7669	13.9789	15.901	9.54685	14.9399	0.639015
PAK4	ERBB2 & ERBB4 signaling pathways	30.3608	36.5963	18.6297	30.163	33.4785	24.3963	1.37228
PAK6	ERBB2 & ERBB4 signaling pathways	7.2711	7.6915	4.5018	5.7104	7.4813	5.1061	1.46517
PIK3R1	ERBB2 & ERBB4 signaling pathways	6.3076	5.7655	8.1324	9.2047	6.03655	8.66855	0.696374
PIK3R3	ERBB2 & ERBB4 signaling pathways	14.2817	18.118	70.3161	68.646	16.1998	69.4811	0.233155
RPS6KB2	ERBB2 & ERBB4 signaling pathways	31.2101	29.5765	19.4426	21.2785	30.3933	20.3605	1.49275
STAT5B	ERBB2 & ERBB4 signaling pathways	13.2578	11.1108	8.3333	6.9323	12.1843	7.6328	1.59631
ABHD17C	MAPK signaling	7.3874	8.5623	11.4964	8.8454	7.97485	10.1709	0.784085
ARRB2	MAPK signaling	62.0541	60.016	18.6896	21.6278	61.035	20.1587	3.02773
ATF2	MAPK signaling	4.9111	5.709	5.4857	7.9505	5.31005	6.7181	0.790409
CACNA2D1	MAPK signaling	7.5503	6.1988	37.8636	27.2323	6.87455	32.548	0.211213
CAMK2D	MAPK signaling	15.742	13.4222	30.6057	21.6492	14.5821	26.1274	0.558114
CDC14A	MAPK signaling	9.0291	10.4422	3.8341	3.3505	9.73565	3.5923	2.71014
CDC25B	MAPK signaling	21.7878	34.3247	12.9266	21.3526	28.0562	17.1396	1.63693
CRKL	MAPK signaling	24.3019	30.5456	20.8644	21.0568	27.4237	20.9606	1.30835
DAB2IP	MAPK signaling	8.8308	9.2567	3.7143	4.3022	9.04375	4.00825	2.25628
DDIT3	MAPK signaling	21.8984	21.8725	35.7269	38.2748	21.8854	37.0008	0.591485
DLG3	MAPK signaling	17.9021	17.9114	9.6175	12.045	17.9068	10.8313	1.65325
DUSP1	MAPK signaling	7.9855	5.5278	7.6308	12.9063	6.75665	10.2685	0.657995
DUSP10	MAPK signaling	13.8687	11.0702	4.6339	3.954	12.4695	4.29395	2.90396
DUSP16	MAPK signaling	24.9361	20.7346	16.8344	15.9639	22.8353	16.3991	1.39247
DUSP6	MAPK signaling	2.1279	2.8187	10.6631	5.9926	2.4733	8.32785	0.296991
EFNA1	MAPK signaling	24.1971	20.1026	17.3643	15.3744	22.1499	16.3694	1.35313
EFNA3	MAPK signaling	10.618	8.9305	3.866	4.2539	9.77425	4.05995	2.40748
EGFR	MAPK signaling	4.4701	3.9499	8.1231	8.1424	4.21	8.13275	0.51766
ELK4	MAPK signaling	14.4911	16.1507	22.5902	18.3527	15.3209	20.4714	0.748403
ERBB2	MAPK signaling	10.8294	8.5158	5.7619	5.6472	9.6726	5.70455	1.69559
ERBB3	MAPK signaling	42.359	37.3206	22.1517	23.8164	39.8398	22.9841	1.73337
FGFR3	MAPK signaling	17.9948	18.6874	8.8886	9.786	18.3411	9.3373	1.96428
FLNB	MAPK signaling	17.8894	18.9848	29.936	43.2444	18.4371	36.5902	0.503881
FOS	MAPK signaling	1.6359	2.4152	2.5154	33.1655	2.02555	17.8405	0.113537
GADD45A	MAPK signaling	5.2869	5.6643	7.703	7.284	5.4756	7.4935	0.730713
GNG12	MAPK signaling	23.2503	27.0157	34.6419	30.5524	25.133	32.5971	0.771018
GRIN1	MAPK signaling	10.5175	9.4641	5.6356	7.7114	9.9908	6.6735	1.49709
HGF	MAPK signaling	0.1669	0.3543	32.2197	36.3902	0.2606	34.305	0.00759657
HRAS	MAPK signaling	30.3216	34.7812	21.8235	25.9797	32.5514	23.9016	1.36189
HSPB1	MAPK signaling	100.329	171.516	44.1353	122.541	135.923	83.3383	1.63098
IGF1R	MAPK signaling	9.7835	6.6365	3.5445	4.5426	8.21	4.04355	2.03039
IGF2BP1	MAPK signaling	7.9415	8.1349	5.8662	4.8099	8.0382	5.33805	1.50583
IL1R1	MAPK signaling	2.3595	2.431	12.7175	12.6304	2.39525	12.6739	0.18899
IRAK4	MAPK signaling	10.6432	10.5754	14.924	12.2684	10.6093	13.5962	0.780314
IRS2	MAPK signaling	5.7043	3.2338	17.8696	15.1172	4.46905	16.4934	0.27096
JAK2	MAPK signaling	7.8051	7.339	5.4274	4.9604	7.57205	5.1939	1.45787
JUN	MAPK signaling	7.6652	6.9476	6.882	29.0199	7.3064	17.9509	0.40702
JUND	MAPK signaling	17.4716	27.3647	17.8506	38.8668	22.4181	28.3587	0.790521
KIAA1549	MAPK signaling	6.3352	5.5382	4.4349	4.0921	5.9367	4.2635	1.39245
KITLG	MAPK signaling	11.7986	14.7434	3.343	3.1709	13.271	3.25695	4.07467
MAP3K12	MAPK signaling	7.1374	4.5668	4.1652	4.339	5.8521	4.2521	1.37628
MAP3K13	MAPK signaling	6.5269	5.6861	4.9143	4.2757	6.1065	4.595	1.32894
MAP3K6	MAPK signaling	8.3952	8.1414	3.3327	3.4743	8.2683	3.4035	2.42935
MAP4K4	MAPK signaling	10.8053	11.9862	23.1674	26.984	11.3957	25.0757	0.454454
MAP4K4	MAPK signaling	10.8053	11.9862	23.1674	26.984	11.3957	25.0757	0.454454
MAPK1	MAPK signaling	24.2809	24.8376	18.2341	18.6295	24.5592	18.4318	1.33244
MAPK11	MAPK signaling	16.3175	14.0279	10.7687	11.3686	15.1727	11.0687	1.37078
MAPK3	MAPK signaling	11.1134	10.4671	5.5362	8.7524	10.7903	7.1443	1.51033
MAPK6	MAPK signaling	33.4423	34.8007	28.0393	19.9143	34.1215	23.9768	1.4231
MAPK8	MAPK signaling	8.381	9.7181	11.6516	11.452	9.04955	11.5518	0.783389
MAPK8IP2	MAPK signaling	39.5345	33.7636	17.4122	18.9408	36.6491	18.1765	2.01629
MAPKAPK3	MAPK signaling	11.2993	9.1928	8.7968	6.7163	10.2461	7.75655	1.32095
MET	MAPK signaling	2.8742	4.5317	14.1099	6.5517	3.70295	10.3308	0.358438
MYC	MAPK signaling	44.4595	53.6034	64.1727	70.3324	49.0314	67.2526	0.729065
MYD88	MAPK signaling	5.0594	5.0339	7.518	8.1326	5.04665	7.8253	0.644915
NFKB2	MAPK signaling	15.7835	16.3517	10.6711	10.1249	16.0676	10.398	1.54526
PAK1	MAPK signaling	9.3268	9.7669	13.9789	15.901	9.54685	14.9399	0.639015
PIK3R1	MAPK signaling	6.3076	5.7655	8.1324	9.2047	6.03655	8.66855	0.696374
PLA2G4A	MAPK signaling	3.4917	4.8165	8.3214	5.4381	4.1541	6.87975	0.603816
PPP2R5A	MAPK signaling	33.0302	30.4821	26.3718	17.8273	31.7561	22.0996	1.43696
PTPRA	MAPK signaling	18.3847	14.7935	22.5343	21.744	16.5891	22.1392	0.749311
RAC3	MAPK signaling	20.0382	15.2322	9.9976	13.0397	17.6352	11.5187	1.53101
RALA	MAPK signaling	28.7513	23.4904	34.924	30.5707	26.1209	32.7473	0.797648
RCE1	MAPK signaling	7.8253	8.9537	5.6091	6.753	8.3895	6.18105	1.35729
RGL3	MAPK signaling	20.2484	14.532	8.3912	10.6723	17.3902	9.53175	1.82445
RPS27A	MAPK signaling	375.097	365.883	587.456	437.134	370.49	512.295	0.723196
RPS6KA1	MAPK signaling	14.2147	14.8874	11.8769	8.8176	14.5511	10.3472	1.40627
RPS6KA3	MAPK signaling	11.495	11.0238	18.3345	16.6941	11.2594	17.5143	0.642869
RPS6KA4	MAPK signaling	8.3457	8.7267	6.5578	6.5593	8.5362	6.55855	1.30154
RRAS2	MAPK signaling	10.1701	9.4014	14.5685	11.6517	9.78575	13.1101	0.746428
SOS1	MAPK signaling	10.7613	9.8891	13.3857	12.5395	10.3252	12.9626	0.796538
SPTBN1	MAPK signaling	25.0494	24.7637	19.3584	13.0044	24.9065	16.1814	1.53921
SRC	MAPK signaling	4.797	5.8146	8.1096	8.5374	5.3058	8.3235	0.637448
TAB1	MAPK signaling	7.7009	6.6751	5.4368	5.3069	7.188	5.37185	1.33809
TAOK3	MAPK signaling	18.7815	14.5227	11.7693	9.9962	16.6521	10.8827	1.53014
ATF2	IL2 signaling	4.9111	5.709	5.4857	7.9505	5.31005	6.7181	0.790409
CCND1	IL2 signaling	1499.7	1310.54	1009.77	807.285	1405.12	908.53	1.54658
CCNH	IL2 signaling	12.578	15.2665	25.9366	22.87	13.9223	24.4033	0.570507
CDK2	IL2 signaling	101.197	114.321	75.8306	89.7617	107.759	82.7962	1.3015
CRKL	IL2 signaling	24.3019	30.5456	20.8644	21.0568	27.4237	20.9606	1.30835
E2F1	IL2 signaling	47.4715	44.9741	24.2457	30.9163	46.2228	27.581	1.67589
ETS2	IL2 signaling	1.5303	2.1529	20.0487	7.3225	1.8416	13.6856	0.134565
FOS	IL2 signaling	1.6359	2.4152	2.5154	33.1655	2.02555	17.8405	0.113537
HRAS	IL2 signaling	30.3216	34.7812	21.8235	25.9797	32.5514	23.9016	1.36189
HSP90AA1	IL2 signaling	514.763	543.664	850.266	639.546	529.214	744.906	0.710443
IRS2	IL2 signaling	5.7043	3.2338	17.8696	15.1172	4.46905	16.4934	0.27096
ITM2B	IL2 signaling	10.5572	7.768	7.7536	6.146	9.1626	6.9498	1.3184
JUN	IL2 signaling	7.6652	6.9476	6.882	29.0199	7.3064	17.9509	0.40702
MAPK1	IL2 signaling	24.2809	24.8376	18.2341	18.6295	24.5592	18.4318	1.33244
MAPK11	IL2 signaling	16.3175	14.0279	10.7687	11.3686	15.1727	11.0687	1.37078
MAPK3	IL2 signaling	11.1134	10.4671	5.5362	8.7524	10.7903	7.1443	1.51033
MAPK8	IL2 signaling	8.381	9.7181	11.6516	11.452	9.04955	11.5518	0.783389
MTOR	IL2 signaling	21.5109	20.3225	15.1903	14.7356	20.9167	14.9629	1.3979
MYC	IL2 signaling	44.4595	53.6034	64.1727	70.3324	49.0314	67.2526	0.729065
NR3C1	IL2 signaling	10.4255	7.944	6.3683	5.3495	9.18475	5.8589	1.56766
PIK3R1	IL2 signaling	6.3076	5.7655	8.1324	9.2047	6.03655	8.66855	0.696374
PIK3R3	IL2 signaling	14.2817	18.118	70.3161	68.646	16.1998	69.4811	0.233155
PLCB1	IL2 signaling	4.1649	3.8998	7.2364	6.2131	4.03235	6.72475	0.599628
PPIA	IL2 signaling	388.346	507.712	505.128	630.737	448.029	567.933	0.788877
PTPN6	IL2 signaling	9.8383	6.5008	12.2854	10.3882	8.16955	11.3368	0.720622
RPS6	IL2 signaling	312.849	309.171	512.482	439.297	311.01	475.89	0.653533
RPS6KB2	IL2 signaling	31.2101	29.5765	19.4426	21.2785	30.3933	20.3605	1.49275
SOS1	IL2 signaling	10.7613	9.8891	13.3857	12.5395	10.3252	12.9626	0.796538
STAT5B	IL2 signaling	13.2578	11.1108	8.3333	6.9323	12.1843	7.6328	1.59631
UGCG	IL2 signaling	10.6285	7.8572	14.3481	10.3655	9.24285	12.3568	0.747997
CRKL	Interferon Signaling	24.3019	30.5456	20.8644	21.0568	27.4237	20.9606	1.30835
DHX36	Interferon Signaling	23.0422	21.4157	29.6725	27.0324	22.229	28.3524	0.784022
EIF4B	Interferon Signaling	191.611	181.242	310.148	276.626	186.427	293.387	0.635429
IFNAR2	Interferon Signaling	6.316	5.8386	8.3572	8.0885	6.0773	8.22285	0.739075
IRS2	Interferon Signaling	5.7043	3.2338	17.8696	15.1172	4.46905	16.4934	0.27096
MTOR	Interferon Signaling	21.5109	20.3225	15.1903	14.7356	20.9167	14.9629	1.3979
MYD88	Interferon Signaling	5.0594	5.0339	7.518	8.1326	5.04665	7.8253	0.644915
NFKB2	Interferon Signaling	15.7835	16.3517	10.6711	10.1249	16.0676	10.398	1.54526
PIK3R1	Interferon Signaling	6.3076	5.7655	8.1324	9.2047	6.03655	8.66855	0.696374
PRMT1	Interferon Signaling	80.4827	104.711	105.431	131.481	92.5968	118.456	0.781699
PTPN6	Interferon Signaling	9.8383	6.5008	12.2854	10.3882	8.16955	11.3368	0.720622
RPS6	Interferon Signaling	312.849	309.171	512.482	439.297	311.01	475.89	0.653533
RPS6KA4	Interferon Signaling	8.3457	8.7267	6.5578	6.5593	8.5362	6.55855	1.30154
STAT2	Interferon Signaling	14.9949	9.0381	10.2104	7.9382	12.0165	9.0743	1.32423
